# Supplementary material for: An Epigenome-Wide DNA Methylation Map of Testis in Pigs for Study of Complex Traits
Source: Front Genet. 2019 Apr 30;10:405. doi: 10.3389/fgene.2019.00405 (PMC6502962; doi:10.3389/fgene.2019.00405)
Supplement: FILE S1 — Details of 12,738 DMCs with chromosomes, positions, P-values, Q-values, associated genes, genetic features and methylation levels. [file Data_Sheet_1.xlsx]

## Sheet: 12738 DMCs
Chromosome	Position	P-value	Q-value	NCBI Reference Sequence	Gene name	Genic feature	Genic feature start position	Genic feature end position	CpG island start position	CpG island end position	CpG island shore start position	CpG island shore end position	Coverage1	Num of Cs1	Num of Ts1	Coverage2	Num of Cs2	Num of Ts2	Coverage3	Num of Cs3	Num of Ts3	Coverage4	Num of Cs4	Num of Ts4	Coverage5	Num of Cs5	Num of Ts5	Coverage6	Num of Cs6	Num of Ts6	Coverage7	Num of Cs7	Num of Ts7	Coverage8	Num of Cs8	Num of Ts8	Coverage9	Num of Cs9	Num of Ts9
chr1	206681	3.3015e-06	0.00056065			Intergenic			206408	206910			27	11	16	157	39	118	84	39	45	111	33	78	51	20	31	117	54	63	140	78	62	150	69	81	25	12	13
chr1	206721	2.28459e-15	1.67184e-12			Intergenic			206408	206910			16	8	8	31	0	31	38	2	36	44	1	43	19	1	18	53	2	51	74	0	74	80	74	6	14	0	14
chr1	206722	4.83809e-10	1.7522e-07			Intergenic			206408	206910			28	13	15	54	0	54	47	0	47	33	0	33	26	0	26	106	0	106	93	0	93	65	59	6	15	0	15
chr1	226369	2.94972e-26	6.48335e-23			Intergenic			225765	226746			19	11	8	164	162	2	15	15	0	76	68	8	37	37	0	28	27	1	76	70	6	78	3	75	19	19	0
chr1	232721	4.07945e-14	2.58665e-11			Intergenic			232680	234567			16	5	11	53	0	53	29	0	29	64	0	64	48	0	48	76	0	76	46	0	46	45	38	7	14	0	14
chr1	233041	4.90994e-41	4.27145e-37			Intergenic			232680	234567			39	26	13	42	1	41	41	2	39	116	2	114	47	0	47	109	0	109	73	5	68	241	229	12	27	0	27
chr1	233063	2.53818e-38	1.68856e-34			Intergenic			232680	234567			39	28	11	42	0	42	41	0	41	116	2	114	47	0	47	109	0	109	73	0	73	240	224	16	27	0	27
chr1	242118	7.11089e-05	0.00750001			Intergenic							11	3	8	60	9	51	15	14	1	41	5	36	23	1	22	41	24	17	47	20	27	55	27	28	12	6	6
chr1	242168	7.96797e-18	7.66628e-15			Intergenic							10	5	5	119	110	9	20	19	1	65	58	7	31	29	2	30	28	2	61	56	5	66	3	63	10	10	0
chr1	298998	6.01184e-09	1.83624e-06			Intergenic			298970	299341			11	3	8	60	54	6	39	33	6	65	62	3	36	35	1	62	57	5	62	60	2	55	1	54	13	12	1
chr1	298999	1.95197e-13	1.13739e-10			Intergenic			298970	299341			31	13	18	102	94	8	70	65	5	124	111	13	44	38	6	87	78	9	106	91	15	94	1	93	41	40	1
chr1	301183	1.37442e-06	0.000259375			Intergenic					300578	301457	21	1	20	147	45	102	30	2	28	97	22	75	49	15	34	77	7	70	96	13	83	80	3	77	34	2	32
chr1	309277	1.49706e-06	0.000278804			Intergenic					307556	309619	31	7	24	99	7	92	20	0	20	77	2	75	46	2	44	42	4	38	95	6	89	85	42	43	18	0	18
chr1	321835	6.43303e-26	1.37982e-22			Intergenic							22	9	13	99	0	99	51	0	51	78	0	78	42	0	42	90	0	90	88	0	88	88	80	8	25	0	25
chr1	325849	2.56547e-06	0.000449768			Intergenic							30	14	16	77	54	23	50	40	10	78	66	12	35	21	14	75	58	17	90	64	26	134	43	91	15	10	5
chr1	345005	9.8116e-06	0.00143617			Intergenic					343046	345045	16	14	2	97	64	33	58	42	16	67	52	15	41	32	9	75	69	6	117	103	14	94	78	16	19	19	0
chr1	346846	6.34886e-08	1.60501e-05			Intergenic					345273	348883	13	8	5	100	48	52	10	3	7	54	0	54	38	18	20	31	0	31	54	24	30	56	1	55	10	0	10
chr1	348601	1.78189e-08	4.99606e-06			Intergenic					345273	348883	10	4	6	98	84	14	21	17	4	101	87	14	47	37	10	44	37	7	107	93	14	57	0	57	23	19	4
chr1	348602	3.78791e-06	0.00063151			Intergenic					345273	348883	16	8	8	103	85	18	15	11	4	103	79	24	39	30	9	55	42	13	85	65	20	52	2	50	23	20	3
chr1	354705	5.19025e-05	0.00580389			Intergenic					352627	356278	15	0	15	125	13	112	38	13	25	64	0	64	34	1	33	61	0	61	73	4	69	62	0	62	15	0	15
chr1	360408	6.65436e-06	0.00102938			Intergenic			359195	360744			11	5	6	77	25	52	16	10	6	79	26	53	48	13	35	51	37	14	59	24	35	53	43	10	15	7	8
chr1	361527	5.91536e-10	2.11101e-07			Intergenic					361425	361569	14	9	5	93	41	52	29	12	17	41	0	41	30	12	18	43	0	43	51	19	32	46	0	46	13	0	13
chr1	361528	3.19584e-12	1.60637e-09			Intergenic					361425	361569	19	11	8	168	66	102	53	23	30	102	0	102	39	14	25	93	0	93	86	36	50	88	0	88	12	0	12
chr1	375912	2.22306e-17	2.02756e-14			Intergenic			375686	377068			10	9	1	62	0	62	18	0	18	73	0	73	41	0	41	61	0	61	50	0	50	61	58	3	12	0	12
chr1	375913	2.21014e-19	2.57444e-16			Intergenic			375686	377068			30	14	16	125	0	125	19	0	19	94	0	94	45	0	45	74	0	74	68	0	68	74	69	5	18	0	18
chr1	375925	3.47104e-09	1.09932e-06			Intergenic			375686	377068			10	1	9	62	54	8	18	15	3	73	61	12	41	37	4	61	48	13	50	48	2	61	0	61	12	10	2
chr1	375926	2.34855e-08	6.41991e-06			Intergenic			375686	377068			30	16	14	125	105	20	19	15	4	94	80	14	45	38	7	74	67	7	68	65	3	74	1	73	18	16	2
chr1	376605	1.7724e-05	0.00237704			Intergenic			375686	377068			12	11	1	98	85	13	54	53	1	92	87	5	18	17	1	86	85	1	108	105	3	81	81	0	18	18	0
chr1	376658	2.0151e-10	7.74923e-08			Intergenic			375686	377068			15	4	11	97	8	89	54	3	51	91	6	85	17	0	17	86	4	82	110	4	106	141	68	73	19	1	18
chr1	387198	1.0871e-07	2.6245e-05			Intergenic					386847	387220	23	22	1	128	55	73	41	22	19	147	141	6	45	42	3	69	65	4	109	51	58	106	105	1	26	24	2
chr1	401682	4.22131e-07	8.9892e-05			Intergenic							22	8	14	44	0	44	38	0	38	36	0	36	26	0	26	70	1	69	85	0	85	53	39	14	16	0	16
chr1	402814	3.16467e-07	6.90578e-05			Intergenic							17	10	7	85	61	24	38	11	27	66	38	28	35	17	18	56	26	30	92	40	52	107	31	76	11	4	7
chr1	402946	2.2851e-06	0.000405878			Intergenic							23	20	3	106	92	14	34	31	3	102	92	10	47	34	13	67	55	12	79	64	15	89	52	37	18	14	4
chr1	405896	6.70505e-07	0.000136721			Intergenic							10	5	5	93	14	79	34	7	27	72	10	62	42	8	34	94	27	67	112	35	77	36	31	5	15	2	13
chr1	446715	4.16003e-07	8.87334e-05			Intergenic					446171	447685	24	1	23	92	5	87	39	21	18	95	14	81	36	1	35	62	30	32	68	23	45	66	27	39	13	1	12
chr1	453756	1.132e-07	2.71968e-05			Intergenic							17	5	12	116	74	42	54	24	30	112	51	61	69	27	42	123	51	72	149	60	89	65	7	58	19	6	13
chr1	455043	1.64987e-12	8.60233e-10			Intergenic							27	11	16	64	0	64	18	0	18	81	0	81	35	0	35	65	0	65	107	0	107	62	60	2	21	0	21
chr1	464234	5.40811e-06	0.000860459			Intergenic			461673	464321			22	6	16	55	2	53	33	3	30	67	5	62	40	1	39	49	4	45	72	4	68	114	47	67	15	0	15
chr1	464235	4.33319e-12	2.13239e-09			Intergenic			461673	464321			27	21	6	70	64	6	39	39	0	54	52	2	38	34	4	58	52	6	106	99	7	153	79	74	20	16	4
chr1	500256	1.96023e-10	7.55688e-08			Intergenic			499641	502750			34	33	1	106	100	6	79	74	5	103	2	101	55	54	1	120	0	120	153	72	81	113	106	7	22	0	22
chr1	500391	5.67076e-05	0.00624418			Intergenic			499641	502750			19	5	14	71	15	56	37	1	36	73	5	68	32	1	31	77	5	72	102	5	97	59	2	57	18	1	17
chr1	515873	1.14768e-10	4.60125e-08			Intergenic			515278	516523			14	0	14	106	7	99	20	6	14	67	11	56	51	1	50	74	8	66	96	19	77	96	45	51	11	3	8
chr1	515970	4.63928e-05	0.00529832			Intergenic			515278	516523			21	4	17	168	58	110	77	56	21	83	5	78	63	24	39	51	3	48	123	38	85	54	7	47	11	1	10
chr1	515971	4.98424e-05	0.00561903			Intergenic			515278	516523			21	15	6	150	106	44	49	15	34	67	64	3	64	51	13	70	68	2	119	80	39	51	49	2	11	11	0
chr1	516000	4.3477e-18	4.29605e-15			Intergenic			515278	516523			20	15	5	94	39	55	59	0	59	97	92	5	45	20	25	78	76	2	78	44	34	67	65	2	25	24	1
chr1	517494	4.95733e-10	1.78965e-07			Intergenic			517430	518584			38	20	18	98	96	2	55	52	3	106	101	5	41	41	0	102	99	3	121	117	4	68	3	65	20	19	1
chr1	571579	9.17553e-14	5.57089e-11			Intergenic			570490	571637			36	17	19	94	47	47	58	0	58	93	85	8	49	24	25	109	103	6	138	67	71	67	67	0	24	23	1
chr1	571580	5.20812e-14	3.25748e-11			Intergenic			570490	571637			18	10	8	71	33	38	54	1	53	94	82	12	36	15	21	117	115	2	105	58	47	70	63	7	20	18	2
chr1	592193	9.40853e-06	0.00138779			Intergenic			591580	593230			18	7	11	101	56	45	18	0	18	77	68	9	32	17	15	47	46	1	71	33	38	50	43	7	19	19	0
chr1	592194	2.4203e-07	5.42027e-05			Intergenic			591580	593230			19	10	9	106	55	51	24	0	24	100	93	7	28	13	15	69	61	8	90	46	44	76	69	7	20	19	1
chr1	602927	1.3806e-10	5.46635e-08			Intergenic			602925	603137			12	3	9	103	55	48	29	0	29	75	70	5	44	27	17	52	51	1	65	27	38	76	75	1	10	9	1
chr1	602932	1.41679e-09	4.77139e-07			Intergenic			602925	603137			12	3	9	103	54	49	29	0	29	75	71	4	44	28	16	51	50	1	65	28	37	76	70	6	10	10	0
chr1	638834	5.1443e-20	6.38695e-17			Intergenic			638761	639396			17	10	7	79	37	42	53	52	1	45	0	45	30	15	15	87	0	87	86	40	46	81	1	80	27	0	27
chr1	638835	9.92692e-08	2.41673e-05			Intergenic			638761	639396			26	20	6	153	129	24	68	67	1	82	35	47	36	23	13	126	64	62	120	97	23	95	51	44	23	11	12
chr1	647749	5.11566e-05	0.00573963			Intergenic					646911	648910	11	11	0	74	73	1	33	32	1	60	56	4	38	35	3	56	54	2	82	76	6	72	55	17	12	12	0
chr1	653535	1.83817e-17	1.69515e-14			Intergenic			653440	653701			13	10	3	55	53	2	19	17	2	41	40	1	16	13	3	44	44	0	73	68	5	66	1	65	17	17	0
chr1	653562	1.49356e-16	1.24201e-13			Intergenic			653440	653701			13	10	3	55	51	4	19	18	1	41	41	0	16	14	2	44	43	1	73	70	3	66	1	65	17	17	0
chr1	653563	5.93382e-11	2.47633e-08			Intergenic			653440	653701			20	11	9	80	77	3	26	25	1	69	65	4	44	41	3	69	67	2	74	74	0	58	3	55	19	18	1
chr1	686673	6.55816e-11	2.71864e-08			Intergenic			686484	686973			19	11	8	88	74	14	45	25	20	91	68	23	46	35	11	93	44	49	113	58	55	144	64	80	15	5	10
chr1	686729	7.04193e-12	3.36294e-09			Intergenic			686484	686973			26	10	16	128	21	107	47	21	26	105	29	76	48	14	34	133	50	83	142	58	84	134	89	45	25	10	15
chr1	692015	3.44177e-12	1.72164e-09			Intergenic			690192	693228			16	7	9	142	127	15	43	39	4	80	69	11	36	32	4	76	70	6	79	68	11	65	0	65	27	24	3
chr1	692334	1.70378e-14	1.12206e-11			Intergenic			690192	693228			13	7	6	100	53	47	50	1	49	101	96	5	36	17	19	80	77	3	94	59	35	94	86	8	14	14	0
chr1	692335	7.93421e-14	4.86951e-11			Intergenic			690192	693228			18	8	10	80	35	45	41	0	41	63	60	3	35	23	12	61	58	3	77	37	40	71	67	4	13	13	0
chr1	718843	8.68692e-08	2.13829e-05			Intergenic					718165	720164	18	3	15	109	16	93	63	20	43	79	20	59	43	2	41	123	46	77	112	46	66	81	34	47	19	9	10
chr1	720581	1.85901e-22	2.94985e-19			Intergenic			720165	720698			10	4	6	128	125	3	27	26	1	70	68	2	47	44	3	57	57	0	67	67	0	68	1	67	17	17	0
chr1	730668	5.49923e-13	3.03922e-10			Intergenic			729792	730788			18	10	8	91	87	4	25	25	0	68	64	4	23	19	4	70	63	7	69	65	4	59	3	56	18	18	0
chr1	764521	5.22092e-06	0.000834733			Intergenic					764167	766166	16	11	5	195	92	103	37	31	6	135	72	63	69	35	34	86	68	18	115	65	50	66	63	3	24	13	11
chr1	764545	2.99561e-18	3.01023e-15			Intergenic					764167	766166	14	10	4	93	89	4	32	27	5	74	66	8	43	40	3	75	73	2	62	61	1	67	0	67	14	14	0
chr1	764546	2.07805e-17	1.90226e-14			Intergenic					764167	766166	12	8	4	89	83	6	36	36	0	57	54	3	33	31	2	67	64	3	67	62	5	56	1	55	15	14	1
chr1	764598	9.09303e-08	2.23075e-05			Intergenic					764167	766166	16	3	13	92	6	86	32	0	32	74	5	69	42	0	42	75	7	68	62	3	59	103	38	65	14	2	12
chr1	778760	4.54967e-06	0.000740448			Intergenic			773861	779689			17	16	1	144	133	11	67	59	8	133	97	36	60	38	22	119	93	26	130	102	28	125	83	42	21	17	4
chr1	785259	5.67743e-06	0.000898367			Intergenic							12	4	8	92	12	80	14	0	14	76	5	71	44	2	42	21	1	20	60	12	48	73	36	37	10	0	10
chr1	812094	3.6867e-19	4.15813e-16			Intergenic			811957	812875			16	6	10	147	0	147	48	0	48	53	0	53	41	0	41	85	0	85	109	0	109	75	57	18	29	0	29
chr1	827014	5.10521e-12	2.4877e-09			Intergenic			826036	828929			10	4	6	94	9	85	17	2	15	74	1	73	36	2	34	47	0	47	63	6	57	60	50	10	12	0	12
chr1	827532	1.99956e-09	6.58429e-07			Intergenic			826036	828929			17	2	15	107	0	107	21	0	21	70	0	70	37	0	37	76	0	76	66	0	66	28	20	8	21	0	21
chr1	839707	1.1394e-08	3.31028e-06			Intergenic					837800	839986	32	6	26	93	10	83	27	7	20	126	11	115	42	3	39	61	8	53	110	20	90	130	62	68	21	3	18
chr1	843989	3.64359e-06	0.000611465			Intergenic					840304	844207	21	12	9	93	54	39	65	54	11	99	58	41	37	13	24	108	94	14	100	79	21	87	71	16	25	21	4
chr1	850994	6.47298e-08	1.63274e-05			Intergenic			848481	851787			25	12	13	88	86	2	20	17	3	65	62	3	23	23	0	82	78	4	77	69	8	57	6	51	20	20	0
chr1	853310	2.41071e-05	0.00308225			Intergenic					851788	855129	11	3	8	109	33	76	39	15	24	88	44	44	54	21	33	58	16	42	153	77	76	54	37	17	21	12	9
chr1	859935	1.45788e-08	4.15226e-06			Intergenic			859663	860994			28	14	14	109	108	1	46	42	4	135	133	2	49	46	3	132	129	3	116	113	3	148	81	67	32	30	2
chr1	860366	4.39085e-15	3.10188e-12			Intergenic			859663	860994			15	9	6	95	93	2	55	53	2	87	81	6	33	30	3	84	80	4	81	74	7	53	3	50	18	18	0
chr1	865985	4.19162e-23	7.18259e-20			Intergenic			863200	877356			31	20	11	147	146	1	49	45	4	101	93	8	45	44	1	92	88	4	98	92	6	85	4	81	26	25	1
chr1	865986	6.71992e-15	4.62127e-12			Intergenic			863200	877356			12	4	8	102	99	3	46	42	4	91	85	6	31	27	4	73	71	2	72	69	3	64	0	64	26	25	1
chr1	866056	2.46058e-05	0.00313442			Intergenic			863200	877356			27	9	18	102	97	5	53	50	3	112	100	12	26	22	4	133	130	3	130	123	7	68	5	63	25	25	0
chr1	867851	6.66114e-05	0.00712103			Intergenic			863200	877356			16	16	0	59	59	0	16	15	1	86	84	2	45	43	2	72	66	6	69	66	3	61	49	12	18	17	1
chr1	871967	8.56375e-14	5.22495e-11			Intergenic			863200	877356			11	6	5	106	93	13	16	16	0	62	52	10	24	23	1	37	30	7	55	47	8	59	3	56	10	9	1
chr1	872078	1.77666e-05	0.00238173			Intergenic			863200	877356			14	1	13	114	12	102	22	8	14	88	17	71	50	0	50	58	16	42	73	19	54	84	31	53	17	4	13
chr1	873460	2.5017e-08	6.80565e-06			Intergenic			863200	877356			14	5	9	142	134	8	36	34	2	88	79	9	35	34	1	60	55	5	74	69	5	49	6	43	17	17	0
chr1	887709	3.84452e-07	8.25893e-05			Intergenic							15	10	5	122	108	14	28	25	3	54	53	1	41	31	10	33	25	8	70	61	9	30	1	29	11	10	1
chr1	897422	2.17215e-14	1.42e-11			Intergenic			895513	918409			20	9	11	83	79	4	34	34	0	87	83	4	38	36	2	81	79	2	91	84	7	73	2	71	28	27	1
chr1	897423	2.14413e-11	9.58457e-09			Intergenic			895513	918409			16	4	12	102	101	1	24	23	1	76	68	8	32	31	1	55	53	2	91	85	6	55	4	51	14	11	3
chr1	897426	6.84885e-11	2.83253e-08			Intergenic			895513	918409			20	9	11	83	79	4	34	30	4	87	81	6	38	36	2	81	79	2	91	89	2	73	2	71	28	27	1
chr1	897427	2.77523e-11	1.21481e-08			Intergenic			895513	918409			16	5	11	102	101	1	24	23	1	76	72	4	32	32	0	55	53	2	91	87	4	55	4	51	13	13	0
chr1	897772	5.04492e-06	0.000811491			Intergenic			895513	918409			20	11	9	114	73	41	27	17	10	94	44	50	52	28	24	68	25	43	109	35	74	98	43	55	16	6	10
chr1	903683	5.89217e-11	2.46142e-08			Intergenic			895513	918409			15	4	11	112	86	26	65	19	46	91	49	42	50	28	22	105	30	75	100	31	69	39	11	28	16	3	13
chr1	905125	2.48752e-05	0.00316289			Intergenic			895513	918409			10	8	2	121	45	76	15	11	4	108	62	46	56	26	30	56	44	12	83	52	31	59	39	20	21	15	6
chr1	907153	3.83147e-07	8.23516e-05			Intergenic			895513	918409			17	7	10	173	71	102	18	13	5	123	62	61	69	31	38	49	37	12	101	66	35	10	6	4	21	17	4
chr1	908133	7.94898e-06	0.0012004			Intergenic			895513	918409			16	13	3	118	89	29	56	48	8	115	85	30	51	33	18	69	66	3	107	103	4	69	60	9	14	14	0
chr1	914090	2.03084e-13	1.18059e-10			Intergenic			895513	918409			11	9	2	153	38	115	18	17	1	98	22	76	51	3	48	48	41	7	105	53	52	63	58	5	15	6	9
chr1	914103	3.92509e-08	1.03147e-05			Intergenic			895513	918409			29	23	6	213	186	27	83	65	18	164	140	24	48	46	2	126	89	37	190	129	61	137	91	46	36	28	8
chr1	916197	2.67574e-08	7.23795e-06			Intergenic			895513	918409			16	6	10	130	11	119	14	11	3	94	24	70	42	2	40	44	28	16	105	47	58	59	22	37	23	9	14
chr1	917985	2.42552e-14	1.57487e-11			Intergenic			895513	918409			15	11	4	88	83	5	34	29	5	71	69	2	41	40	1	83	79	4	86	81	5	56	2	54	17	16	1
chr1	923765	3.96637e-17	3.51351e-14			Intergenic			923724	924400			10	6	4	128	121	7	19	18	1	55	51	4	43	41	2	54	50	4	63	61	2	60	3	57	16	15	1
chr1	923839	1.96428e-15	1.44766e-12			Intergenic			923724	924400			10	3	7	127	123	4	19	17	2	55	49	6	44	40	4	54	52	2	63	60	3	60	1	59	16	16	0
chr1	930251	4.09032e-17	3.60889e-14			Intergenic			929647	931508			17	6	11	56	55	1	21	21	0	36	35	1	23	23	0	42	40	2	29	29	0	79	4	75	13	13	0
chr1	931027	1.92877e-06	0.000349217			Intergenic			929647	931508			17	4	13	166	23	143	16	9	7	85	18	67	38	2	36	70	41	29	92	30	62	70	26	44	14	4	10
chr1	935254	1.6948e-07	3.93359e-05			Intergenic					934642	936641	18	7	11	100	4	96	36	6	30	82	7	75	39	0	39	33	4	29	65	6	59	124	52	72	10	0	10
chr1	970771	4.90472e-13	2.72609e-10			Intergenic			970705	972819			46	14	32	167	58	109	111	48	63	106	3	103	56	16	40	108	3	105	160	36	124	102	5	97	30	1	29
chr1	970772	6.52855e-08	1.64509e-05			Intergenic			970705	972819			18	11	7	138	74	64	106	46	60	53	50	3	46	27	19	54	51	3	124	71	53	64	59	5	15	14	1
chr1	971950	1.95189e-10	7.52941e-08			Intergenic			970705	972819			17	9	8	87	35	52	54	50	4	79	1	78	31	20	11	68	0	68	81	42	39	62	0	62	17	0	17
chr1	1024731	3.43504e-08	9.12326e-06			Intergenic					1024523	1026522	24	15	9	95	4	91	52	3	49	90	4	86	54	13	41	82	10	72	62	3	59	82	55	27	19	2	17
chr1	1057276	7.82811e-07	0.000156896			Intergenic					1054802	1057384	20	11	9	80	27	53	27	0	27	71	68	3	35	19	16	37	36	1	69	19	50	48	43	5	21	20	1
chr1	1057596	4.64169e-06	0.000753944			Intergenic			1057385	1058187			10	9	1	93	61	32	17	0	17	59	52	7	42	37	5	59	54	5	46	21	25	81	80	1	13	13	0
chr1	1058083	2.14585e-07	4.85987e-05			Intergenic			1057385	1058187			15	4	11	104	12	92	50	1	49	63	18	45	34	0	34	50	29	21	79	15	64	39	23	16	16	4	12
chr1	1058907	1.4751e-18	1.54079e-15			Intergenic			1058718	1059094			24	10	14	104	53	51	62	56	6	90	0	90	35	19	16	93	0	93	96	40	56	70	0	70	22	0	22
chr1	1058908	4.22034e-11	1.80113e-08			Intergenic			1058718	1059094			21	13	8	78	35	43	36	36	0	80	1	79	35	12	23	84	1	83	77	45	32	56	0	56	25	0	25
chr1	1107536	3.89449e-13	2.19724e-10			Intergenic					1106856	1107765	11	10	1	84	41	43	33	0	33	80	73	7	37	37	0	80	76	4	86	53	33	105	97	8	21	21	0
chr1	1117216	4.65654e-05	0.00531226			Intergenic					1116222	1117734	24	8	16	109	18	91	72	17	55	92	19	73	58	16	42	142	41	101	131	48	83	88	34	54	51	19	32
chr1	1165711	1.84937e-14	1.21537e-11			Intergenic			1165050	1165756			13	7	6	111	105	6	35	32	3	93	88	5	23	21	2	71	63	8	75	69	6	58	3	55	27	24	3
chr1	1165729	1.40865e-07	3.31271e-05			Intergenic			1165050	1165756			18	10	8	171	84	87	28	4	24	134	44	90	63	35	28	74	15	59	121	36	85	76	4	72	20	11	9
chr1	1181623	3.7559e-20	4.74848e-17			Intergenic			1179834	1183305			14	9	5	115	109	6	29	27	2	124	107	17	40	36	4	59	51	8	111	106	5	95	9	86	21	20	1
chr1	1181624	3.14722e-15	2.26448e-12			Intergenic			1179834	1183305			11	3	8	76	75	1	11	7	4	63	58	5	31	30	1	23	18	5	65	64	1	69	1	68	15	14	1
chr1	1184616	1.78782e-13	1.04714e-10			Intergenic			1184418	1189586			20	9	11	96	92	4	46	42	4	90	86	4	45	42	3	75	67	8	100	96	4	73	5	68	18	18	0
chr1	1203100	7.18926e-05	0.0075647			Intergenic			1200792	1203825			12	10	2	135	98	37	52	18	34	45	41	4	39	33	6	60	59	1	87	54	33	70	67	3	12	12	0
chr1	1221520	1.32933e-18	1.39674e-15			Intergenic			1219422	1223073			14	8	6	138	131	7	38	36	2	95	92	3	52	46	6	70	67	3	109	109	0	72	4	68	15	14	1
chr1	1224880	1.67312e-05	0.00225972			Intergenic			1224439	1225304			11	3	8	85	13	72	75	27	48	58	10	48	35	3	32	68	22	46	91	20	71	131	63	68	11	6	5
chr1	1228880	8.24555e-07	0.000164302			Intergenic			1228859	1229328			12	9	3	66	64	2	39	34	5	46	45	1	20	19	1	81	74	7	73	70	3	29	0	29	16	16	0
chr1	1228881	5.8996e-11	2.46287e-08			Intergenic			1228859	1229328			21	11	10	76	75	1	29	28	1	53	50	3	18	18	0	100	96	4	75	68	7	51	1	50	16	16	0
chr1	1234928	1.16525e-05	0.00166624			Intergenic			1234658	1234993			26	2	24	103	27	76	22	7	15	117	26	91	63	29	34	66	23	43	94	36	58	118	58	60	24	6	18
chr1	1238308	2.02433e-19	2.37133e-16			Intergenic			1237700	1240086			18	9	9	114	107	7	36	35	1	101	97	4	44	41	3	67	64	3	113	101	12	83	5	78	20	20	0
chr1	1238309	3.08729e-11	1.3415e-08			Intergenic			1237700	1240086			13	6	7	63	61	2	25	23	2	64	60	4	38	34	4	62	57	5	78	73	5	58	6	52	15	14	1
chr1	1238316	1.09803e-12	5.83262e-10			Intergenic			1237700	1240086			18	9	9	114	100	14	36	32	4	101	88	13	44	39	5	67	60	7	113	102	11	83	4	79	20	18	2
chr1	1238317	5.58311e-07	0.00011578			Intergenic			1237700	1240086			13	6	7	63	54	9	25	22	3	64	51	13	38	29	9	62	56	6	78	65	13	58	6	52	15	12	3
chr1	1238357	3.21269e-17	2.87121e-14			Intergenic			1237700	1240086			18	9	9	114	106	8	36	36	0	101	93	8	44	43	1	67	66	1	113	106	7	83	4	79	20	20	0
chr1	1238358	8.24561e-09	2.45757e-06			Intergenic			1237700	1240086			13	6	7	63	59	4	25	18	7	64	61	3	38	32	6	62	60	2	78	74	4	58	5	53	15	12	3
chr1	1238379	1.19987e-13	7.19368e-11			Intergenic			1237700	1240086			10	6	4	98	93	5	20	18	2	52	51	1	34	31	3	45	38	7	63	59	4	47	1	46	14	14	0
chr1	1247353	1.50366e-06	0.000279865			Intergenic			1245729	1247943			37	23	14	200	156	44	56	37	19	133	88	45	77	48	29	118	62	56	161	97	64	132	73	59	24	11	13
chr1	1250015	2.21109e-08	6.07216e-06			Intergenic			1249701	1250340			10	6	4	95	86	9	13	12	1	77	63	14	31	30	1	35	32	3	68	60	8	47	4	43	13	13	0
chr1	1250088	3.3558e-09	1.06526e-06			Intergenic			1249701	1250340			10	8	2	96	87	9	13	13	0	77	62	15	31	29	2	35	33	2	69	66	3	47	3	44	14	13	1
chr1	1250089	1.50163e-21	2.17726e-18			Intergenic			1249701	1250340			14	6	8	149	138	11	38	36	2	93	84	9	29	29	0	67	61	6	78	75	3	95	2	93	26	26	0
chr1	1265921	2.81276e-05	0.00349395			Intergenic			1265800	1266214			10	4	6	117	42	75	44	28	16	72	53	19	51	1	50	69	52	17	85	48	37	75	48	27	19	16	3
chr1	1290393	1.01805e-07	2.47461e-05			Intergenic			1290061	1290400			13	7	6	37	31	6	18	14	4	47	42	5	38	30	8	22	21	1	63	54	9	50	2	48	10	7	3
chr1	1299500	1.22241e-12	6.45195e-10			Intergenic					1298450	1301400	15	10	5	71	70	1	33	31	2	71	63	8	34	31	3	66	62	4	85	83	2	53	0	53	25	23	2
chr1	1304802	3.53578e-16	2.80885e-13			Intergenic			1304696	1305127			10	4	6	135	119	16	27	26	1	82	67	15	42	37	5	54	46	8	103	95	8	89	2	87	16	16	0
chr1	1340131	1.42976e-06	0.000268561			Promoter	1339263	1341263	1339935	1340260			12	7	5	125	90	35	11	2	9	69	49	20	61	37	24	24	11	13	50	27	23	67	22	45	13	6	7
chr1	1364592	2.36527e-05	0.0030331			Intergenic			1364315	1364964			11	7	4	52	38	14	28	9	19	52	35	17	46	35	11	59	26	33	80	39	41	80	26	54	12	6	6
chr1	1382078	3.27886e-18	3.27371e-15			Intergenic			1381565	1382398			15	7	8	60	0	60	34	1	33	87	3	84	41	0	41	76	1	75	68	1	67	62	58	4	14	0	14
chr1	1382079	1.64857e-21	2.37646e-18			Intergenic			1381565	1382398			13	7	6	103	0	103	47	0	47	107	0	107	37	0	37	93	0	93	115	0	115	70	60	10	19	0	19
chr1	1382207	3.34206e-13	1.89848e-10			Intergenic			1381565	1382398			10	4	6	41	0	41	19	0	19	52	0	52	20	0	20	36	0	36	40	0	40	39	36	3	11	0	11
chr1	1382208	1.30758e-17	1.22491e-14			Intergenic			1381565	1382398			16	10	6	96	0	96	32	2	30	104	0	104	35	0	35	76	0	76	123	2	121	69	66	3	22	1	21
chr1	1398831	3.99897e-05	0.00468445			Intergenic			1398711	1399242			28	8	20	202	115	87	84	20	64	147	57	90	81	39	42	126	33	93	145	45	100	127	47	80	36	8	28
chr1	1425856	4.50796e-13	2.52163e-10			Intergenic			1425782	1426276			20	5	15	148	133	15	42	39	3	89	76	13	36	29	7	76	66	10	87	81	6	84	1	83	17	17	0
chr1	1450612	2.40267e-13	1.38637e-10			Intergenic					1449639	1452459	19	9	10	80	69	11	50	45	5	99	80	19	40	36	4	102	83	19	106	95	11	87	2	85	24	18	6
chr1	1450613	2.20741e-08	6.06339e-06			Intergenic					1449639	1452459	28	11	17	125	113	12	47	45	2	110	103	7	47	42	5	123	112	11	147	138	9	81	1	80	34	34	0
chr1	1452581	2.78754e-06	0.000483521			Intergenic			1452460	1454377			15	13	2	76	1	75	32	0	32	43	0	43	25	0	25	77	0	77	53	0	53	47	41	6	16	1	15
chr1	1452586	3.51677e-08	9.32045e-06			Intergenic			1452460	1454377			15	11	4	76	0	76	32	0	32	43	0	43	25	0	25	77	0	77	53	0	53	47	42	5	16	0	16
chr1	1462655	6.42259e-05	0.00691174			Intergenic			1462552	1463062			20	19	1	118	74	44	67	53	14	114	76	38	23	13	10	107	87	20	133	103	30	87	80	7	31	27	4
chr1	1468156	1.37743e-06	0.000259792			Intergenic			1467945	1468497			16	5	11	82	16	66	16	5	11	77	11	66	41	13	28	41	8	33	61	12	49	114	71	43	17	1	16
chr1	1471671	3.30063e-17	2.94346e-14			Intergenic			1471601	1472157			15	12	3	108	0	108	50	0	50	116	6	110	44	18	26	108	0	108	117	0	117	84	81	3	26	1	25
chr1	1482498	2.1318e-20	2.75968e-17			Intergenic			1481835	1482740			10	6	4	102	1	101	25	0	25	65	0	65	22	1	21	55	0	55	57	0	57	72	57	15	10	0	10
chr1	1498987	1.98074e-05	0.00261769			Intergenic					1498776	1500775	18	14	4	135	15	120	30	4	26	116	21	95	52	22	30	76	11	65	102	15	87	83	56	27	14	2	12
chr1	1500966	3.15288e-06	0.000539451			Intergenic			1500776	1500996			34	26	8	80	73	7	28	27	1	105	96	9	54	34	20	83	72	11	71	67	4	145	85	60	17	15	2
chr1	1500967	9.63545e-06	0.00141555			Intergenic			1500776	1500996			25	16	9	61	4	57	24	4	20	64	3	61	46	12	34	35	5	30	56	4	52	135	78	57	15	0	15
chr1	1503615	2.25972e-07	5.09734e-05			Intergenic					1503090	1504818	15	13	2	95	0	95	14	0	14	108	0	108	42	15	27	46	0	46	97	0	97	70	53	17	25	0	25
chr1	1505486	7.93297e-17	6.74569e-14			Intergenic			1505416	1505640			14	14	0	98	1	97	47	0	47	79	0	79	35	17	18	85	1	84	88	0	88	108	90	18	21	0	21
chr1	1505932	4.09484e-12	2.02069e-09			Intergenic					1505641	1508342	13	12	1	115	1	114	61	1	60	92	1	91	18	0	18	75	1	74	97	1	96	62	56	6	25	0	25
chr1	1522395	4.27533e-05	0.00495269			Intergenic					1521967	1524240	11	11	0	160	130	30	48	40	8	106	100	6	31	30	1	79	77	2	90	85	5	63	58	5	15	15	0
chr1	1531363	3.2144e-07	7.0057e-05			Intergenic			1530866	1535259			22	21	1	90	1	89	32	0	32	79	3	76	36	17	19	45	1	44	53	0	53	61	58	3	19	0	19
chr1	1531613	4.29732e-09	1.34357e-06			Intergenic			1530866	1535259			26	6	20	91	8	83	44	4	40	117	9	108	31	1	30	86	8	78	64	3	61	147	65	82	24	3	21
chr1	1545134	7.79018e-09	2.33413e-06			Intergenic			1544898	1545223			20	12	8	137	32	105	132	70	62	143	46	97	60	14	46	155	72	83	175	95	80	64	56	8	49	22	27
chr1	1545135	5.69563e-08	1.45316e-05			Intergenic			1544898	1545223			21	11	10	107	82	25	103	52	51	114	79	35	42	29	13	144	81	63	163	84	79	73	14	59	25	14	11
chr1	1548764	2.90752e-12	1.47096e-09			Intergenic					1548258	1549409	19	18	1	98	0	98	33	0	33	97	1	96	29	0	29	67	0	67	83	1	82	79	71	8	23	0	23
chr1	1551202	1.47255e-06	0.000275264			Intergenic			1551015	1552194			15	15	0	88	1	87	51	0	51	86	0	86	31	13	18	95	0	95	86	0	86	57	47	10	11	0	11
chr1	1551203	1.02517e-14	6.90127e-12			Intergenic			1551015	1552194			24	22	2	106	0	106	50	0	50	129	0	129	40	17	23	72	0	72	122	1	121	102	90	12	18	0	18
chr1	1555745	2.6125e-08	7.07303e-06			Intergenic			1555066	1558772			10	10	0	92	0	92	38	0	38	85	0	85	35	16	19	84	0	84	100	0	100	46	44	2	16	0	16
chr1	1555752	8.15154e-20	9.98116e-17			Intergenic			1555066	1558772			10	3	7	92	0	92	38	0	38	85	0	85	35	0	35	84	0	84	100	0	100	46	41	5	16	0	16
chr1	1559353	1.82497e-08	5.10303e-06			Intergenic			1559235	1559479			17	11	6	83	77	6	27	24	3	63	58	5	34	31	3	61	58	3	66	63	3	115	56	59	15	13	2
chr1	1559395	5.13389e-21	7.07284e-18			Intergenic			1559235	1559479			12	5	7	84	0	84	29	0	29	66	0	66	33	1	32	61	0	61	66	0	66	61	54	7	15	0	15
chr1	1559431	5.80438e-19	6.33968e-16			Intergenic			1559235	1559479			12	6	6	84	0	84	28	2	26	66	0	66	33	1	32	61	5	56	66	4	62	61	55	6	15	0	15
chr1	1560372	6.36705e-13	3.494e-10			Intergenic					1559480	1560949	11	8	3	56	0	56	21	0	21	37	0	37	18	0	18	38	0	38	40	0	40	59	51	8	11	0	11
chr1	1569113	7.89508e-05	0.00813603			Intergenic			1568944	1572468			15	6	9	189	103	86	29	17	12	120	54	66	59	23	36	67	37	30	107	32	75	85	30	55	13	4	9
chr1	1607517	1.31151e-06	0.000248412			Intergenic			1607389	1608573			30	13	17	137	107	30	43	36	7	93	79	14	27	22	5	107	90	17	97	82	15	78	1	77	22	19	3
chr1	1608350	2.22784e-05	0.00288761			Intergenic			1607389	1608573			13	4	9	141	17	124	32	18	14	99	14	85	49	4	45	66	32	34	88	25	63	61	28	33	16	3	13
chr1	1635289	2.15492e-10	8.24867e-08			Intergenic			1634955	1636477			16	10	6	63	59	4	43	37	6	50	42	8	23	23	0	84	74	10	66	62	4	57	2	55	12	12	0
chr1	1635290	7.57291e-14	4.6685e-11			Intergenic			1634955	1636477			19	10	9	90	86	4	38	38	0	89	86	3	24	23	1	85	82	3	79	75	4	63	3	60	23	23	0
chr1	1636289	8.9636e-07	0.000176721			Intergenic			1634955	1636477			15	3	12	165	65	100	10	1	9	78	14	64	57	21	36	35	2	33	73	11	62	66	6	60	27	6	21
chr1	1636290	1.15819e-05	0.00165786			Intergenic			1634955	1636477			25	22	3	173	98	75	14	10	4	117	93	24	51	40	11	44	35	9	83	68	15	79	64	15	21	18	3
chr1	1668690	2.01014e-12	1.03677e-09			Intergenic					1668068	1668717	18	5	13	107	3	104	10	0	10	62	1	61	27	1	26	32	0	32	71	3	68	44	40	4	19	1	18
chr1	1670952	9.48242e-06	0.00139651			Intergenic					1669135	1671584	19	7	12	83	11	72	33	27	6	72	33	39	39	14	25	68	44	24	84	44	40	58	31	27	14	8	6
chr1	1677652	4.28131e-19	4.78969e-16			Intergenic			1677605	1678165			10	7	3	77	76	1	14	14	0	73	65	8	58	58	0	28	26	2	71	70	1	52	0	52	11	11	0
chr1	1679346	2.40299e-06	0.000424694			Intergenic					1678166	1680165	22	6	16	60	50	10	21	20	1	85	81	4	34	29	5	60	54	6	90	78	12	58	2	56	11	8	3
chr1	1679347	1.10583e-12	5.86654e-10			Intergenic					1678166	1680165	14	6	8	77	69	8	27	24	3	64	55	9	36	28	8	79	66	13	87	73	14	69	1	68	17	14	3
chr1	1684347	3.11408e-06	0.000534056			Intergenic			1684296	1685429			36	20	16	92	6	86	68	6	62	65	5	60	48	19	29	59	3	56	88	4	84	137	75	62	32	9	23
chr1	1684402	1.7211e-08	4.84089e-06			Intergenic			1684296	1685429			12	12	0	64	0	64	41	0	41	62	0	62	36	18	18	67	0	67	80	0	80	56	54	2	16	0	16
chr1	1684403	1.18125e-07	2.82399e-05			Intergenic			1684296	1685429			14	14	0	93	1	92	68	0	68	65	0	65	28	14	14	59	0	59	88	0	88	62	55	7	32	0	32
chr1	1712789	4.50619e-11	1.91132e-08			Intergenic					1711941	1713940	14	14	0	92	0	92	21	0	21	48	0	48	31	16	15	47	0	47	68	0	68	60	59	1	10	0	10
chr1	1715321	2.5634e-10	9.70475e-08			Intergenic					1714560	1716559	14	13	1	78	1	77	29	0	29	65	0	65	41	16	25	68	0	68	62	1	61	77	63	14	19	1	18
chr1	1719061	6.35966e-20	7.85669e-17			Intergenic			1718960	1719216			10	10	0	117	0	117	31	0	31	66	0	66	38	17	21	61	0	61	62	0	62	83	76	7	21	0	21
chr1	1719098	1.66041e-19	1.96352e-16			Intergenic			1718960	1719216			10	9	1	117	0	117	31	0	31	66	0	66	38	17	21	61	0	61	62	0	62	83	73	10	21	0	21
chr1	1720135	1.53652e-05	0.00210541			Intergenic			1720071	1720372			14	8	6	92	85	7	49	45	4	74	67	7	31	26	5	58	53	5	90	82	8	32	0	32	15	15	0
chr1	1737260	3.72726e-05	0.00441396			Intergenic			1736695	1737316			17	8	9	64	54	10	76	41	35	65	46	19	26	26	0	159	91	68	111	66	45	44	5	39	25	16	9
chr1	1739244	2.8839e-05	0.00357021			Intergenic			1738784	1739262			17	0	17	78	77	1	57	55	2	120	106	14	39	19	20	83	79	4	106	102	4	56	1	55	28	26	2
chr1	1745203	1.09916e-08	3.20386e-06			Intergenic			1744134	1745711			21	12	9	86	6	80	12	8	4	61	6	55	35	2	33	36	9	27	65	9	56	53	52	1	10	1	9
chr1	1752633	3.41613e-10	1.26407e-07			Intergenic			1752119	1752710			28	12	16	104	7	97	43	4	39	85	6	79	42	1	41	106	6	100	102	10	92	146	77	69	23	4	19
chr1	1779501	9.88886e-13	5.29353e-10			Intergenic			1779426	1779873			17	8	9	94	88	6	37	35	2	83	79	4	34	32	2	65	62	3	91	89	2	73	6	67	19	19	0
chr1	1783652	5.22398e-07	0.000109206			Intergenic					1780963	1784263	26	26	0	113	0	113	40	0	40	111	0	111	38	14	24	104	0	104	101	0	101	81	73	8	29	0	29
chr1	1792284	3.00858e-14	1.93727e-11			Intergenic			1792040	1792605			35	3	32	106	4	102	62	3	59	85	5	80	36	1	35	105	10	95	104	2	102	145	64	81	26	2	24
chr1	1804673	2.31547e-06	0.000410977			Intergenic			1804507	1804796			18	11	7	88	18	70	56	40	16	56	37	19	20	9	11	85	54	31	79	55	24	66	42	24	28	19	9
chr1	1806308	9.59095e-05	0.00950783			Intergenic					1804797	1808082	25	13	12	107	99	8	17	16	1	96	78	18	34	28	6	46	43	3	75	73	2	44	0	44	21	20	1
chr1	1806309	1.04781e-05	0.00152173			Intergenic					1804797	1808082	10	4	6	91	80	11	10	9	1	74	68	6	40	38	2	39	35	4	67	67	0	44	1	43	18	17	1
chr1	1815824	2.64531e-06	0.000461893			Intergenic							18	15	3	135	127	8	10	5	5	118	97	21	45	40	5	54	29	25	110	79	31	40	27	13	34	27	7
chr1	1815855	9.87611e-09	2.90319e-06			Intergenic							18	14	4	135	131	4	10	5	5	118	107	11	45	43	2	54	31	23	110	82	28	40	26	14	34	26	8
chr1	1815876	1.10463e-07	2.66267e-05			Intergenic							31	18	13	171	136	35	13	5	8	144	110	34	63	47	16	79	33	46	157	91	66	59	23	36	45	29	16
chr1	1837127	1.64891e-13	9.68515e-11			Intergenic					1834080	1837179	10	5	5	96	2	94	15	0	15	65	0	65	36	0	36	32	0	32	68	0	68	49	42	7	14	0	14
chr1	1841934	8.40692e-10	2.93698e-07			Intergenic							29	22	7	82	1	81	58	0	58	108	0	108	37	10	27	102	0	102	115	3	112	113	83	30	22	0	22
chr1	1841935	8.76176e-07	0.000173429			Intergenic							12	9	3	50	0	50	52	0	52	56	0	56	33	11	22	71	0	71	80	0	80	63	42	21	11	0	11
chr1	1881250	6.85855e-09	2.07095e-06			Intergenic							15	5	10	98	85	13	25	21	4	77	53	24	36	31	5	44	40	4	86	75	11	72	1	71	12	11	1
chr1	1908406	1.24566e-22	2.00214e-19			Intergenic			1908269	1908498			13	3	10	89	0	89	10	0	10	67	0	67	34	1	33	26	0	26	61	0	61	51	48	3	13	0	13
chr1	1908407	1.35493e-09	4.5717e-07			Intergenic			1908269	1908498			18	6	12	90	0	90	20	0	20	100	0	100	35	0	35	30	0	30	72	0	72	33	29	4	16	0	16
chr1	1929274	1.88123e-08	5.24502e-06			Intergenic					1927729	1929728	18	4	14	46	5	41	33	2	31	57	3	54	29	1	28	53	9	44	69	5	64	126	61	65	18	1	17
chr1	1932482	4.13563e-06	0.000680903			Intergenic							16	6	10	79	60	19	28	12	16	75	56	19	34	17	17	63	35	28	94	65	29	106	30	76	12	4	8
chr1	1932491	9.67967e-05	0.00957609			Intergenic							14	3	11	79	46	33	28	11	17	77	47	30	34	8	26	63	29	34	93	38	55	73	15	58	14	4	10
chr1	1932504	1.1994e-06	0.000229448			Intergenic							14	8	6	79	64	15	28	15	13	77	58	19	34	18	16	63	39	24	94	63	31	73	22	51	14	7	7
chr1	1946612	4.04323e-09	1.26827e-06			Intergenic					1946440	1948445	31	12	19	134	119	15	77	74	3	97	79	18	51	44	7	112	101	11	138	126	12	86	2	84	32	29	3
chr1	1946613	8.90399e-08	2.18826e-05			Intergenic					1946440	1948445	24	8	16	114	97	17	67	52	15	102	82	20	41	37	4	108	91	17	103	93	10	81	3	78	25	18	7
chr1	1969157	1.1693e-28	3.0682e-25			Intergenic							11	5	6	44	0	44	41	0	41	69	0	69	44	0	44	101	1	100	128	0	128	80	74	6	14	0	14
chr1	1972495	2.40838e-11	1.067e-08			Intergenic					1971054	1973053	16	9	7	88	86	2	41	41	0	92	83	9	40	36	4	76	70	6	116	113	3	52	2	50	15	15	0
chr1	1986698	2.78944e-05	0.00346845			Intergenic							19	4	15	95	54	41	25	12	13	96	38	58	47	16	31	67	28	39	136	44	92	77	8	69	24	12	12
chr1	2020759	7.86881e-07	0.00015761			Intergenic					2020387	2022386	18	14	4	95	86	9	59	25	34	60	40	20	54	33	21	121	60	61	131	72	59	100	54	46	15	7	8
chr1	2020760	1.03163e-05	0.00150198			Intergenic					2020387	2022386	15	7	8	67	13	54	60	34	26	65	15	50	54	19	35	84	51	33	107	67	40	102	45	57	11	9	2
chr1	2065928	3.80815e-11	1.63137e-08			Intergenic							13	12	1	118	102	16	36	35	1	54	45	9	45	38	7	51	41	10	57	51	6	43	1	42	11	11	0
chr1	2091809	5.20565e-05	0.00581659			Intergenic					2090165	2092164	10	10	0	80	63	17	15	11	4	92	59	33	62	38	24	44	40	4	81	73	8	54	53	1	15	15	0
chr1	2092240	3.54765e-05	0.00423392			Intergenic			2092165	2093295			21	5	16	95	7	88	22	17	5	101	13	88	46	4	42	54	24	30	125	21	104	92	50	42	16	0	16
chr1	2103994	5.16635e-05	0.00578262			Intergenic					2103578	2105577	20	17	3	118	107	11	20	7	13	133	116	17	47	40	7	46	25	21	118	87	31	127	84	43	28	24	4
chr1	2104056	1.10894e-08	3.22932e-06			Intergenic					2103578	2105577	13	3	10	114	12	102	16	11	5	55	2	53	50	7	43	41	10	31	105	32	73	90	46	44	16	4	12
chr1	2150778	2.74717e-23	4.74009e-20			Intergenic			2150760	2151008			12	8	4	19	0	19	48	0	48	65	0	65	18	0	18	64	0	64	68	0	68	85	80	5	11	0	11
chr1	2211241	2.67199e-27	6.36796e-24			Intergenic					2210703	2212702	14	6	8	124	0	124	49	0	49	99	0	99	39	0	39	74	0	74	111	0	111	73	65	8	18	0	18
chr1	2211258	5.42164e-07	0.000112883			Intergenic					2210703	2212702	33	19	14	168	55	113	117	64	53	192	94	98	87	43	44	177	101	76	267	156	111	172	106	66	46	28	18
chr1	2214431	4.86936e-07	0.000102516			Intergenic					2214309	2216308	17	16	1	83	80	3	36	32	4	54	51	3	30	27	3	71	64	7	92	83	9	87	50	37	28	28	0
chr1	2214432	1.03416e-05	0.00150366			Intergenic					2214309	2216308	19	1	18	99	8	91	40	2	38	64	3	61	41	2	39	101	6	95	102	9	93	120	38	82	21	0	21
chr1	2231565	3.58835e-06	0.000603633			Intergenic					2230792	2232722	36	1	35	220	22	198	120	9	111	143	6	137	78	2	76	244	29	215	237	15	222	193	53	140	32	4	28
chr1	2241763	5.06017e-08	1.30522e-05			Intergenic							11	4	7	89	87	2	13	12	1	66	57	9	39	36	3	56	50	6	61	59	2	43	5	38	10	10	0
chr1	2244502	8.02562e-05	0.00823644			Intergenic					2242568	2244567	14	5	9	78	65	13	32	27	5	61	47	14	21	18	3	48	42	6	62	51	11	35	0	35	11	7	4
chr1	2244589	5.35372e-06	0.000853333			Intergenic			2244568	2244903			15	13	2	76	73	3	61	59	2	78	72	6	33	31	2	106	101	5	104	97	7	72	49	23	23	18	5
chr1	2244590	6.81796e-07	0.000138819			Intergenic			2244568	2244903			19	14	5	100	64	36	71	65	6	116	74	42	26	8	18	114	81	33	114	64	50	79	27	52	21	11	10
chr1	2244639	1.752e-10	6.80265e-08			Intergenic			2244568	2244903			22	9	13	202	129	73	115	52	63	161	81	80	80	46	34	169	72	97	170	64	106	54	0	54	42	19	23
chr1	2247089	1.16044e-13	6.98084e-11			Intergenic					2246202	2248201	12	7	5	50	48	2	26	24	2	76	67	9	33	28	5	53	46	7	96	93	3	61	0	61	18	14	4
chr1	2247551	8.09382e-18	7.77534e-15			Intergenic					2246202	2248201	11	9	2	80	77	3	35	35	0	71	68	3	35	35	0	60	56	4	60	58	2	114	57	57	10	9	1
chr1	2291558	6.60503e-10	2.34368e-07			Intergenic					2290486	2292476	23	7	16	101	95	6	45	40	5	97	87	10	63	58	5	94	87	7	98	93	5	75	2	73	30	26	4
chr1	2291559	4.91965e-20	6.13252e-17			Intergenic					2290486	2292476	20	11	9	90	83	7	55	49	6	94	87	7	30	27	3	96	86	10	79	75	4	91	1	90	19	18	1
chr1	2291700	9.51231e-08	2.32199e-05			Intergenic					2290486	2292476	16	10	6	47	0	47	44	0	44	30	0	30	17	0	17	67	0	67	52	0	52	50	45	5	21	0	21
chr1	2302525	6.78102e-05	0.00721818			Intergenic							17	9	8	210	61	149	18	9	9	131	56	75	80	38	42	52	23	29	106	43	63	49	35	14	21	10	11
chr1	2308535	2.44358e-05	0.00311745			Intergenic			2308211	2309128			12	8	4	110	45	65	52	31	21	102	57	45	57	27	30	71	51	20	83	42	41	58	53	5	16	9	7
chr1	2308605	5.82681e-12	2.8107e-09			Intergenic			2308211	2309128			11	5	6	110	1	109	39	1	38	76	2	74	30	0	30	55	2	53	72	1	71	43	36	7	16	0	16
chr1	2339238	1.99986e-11	8.98161e-09			Intergenic			2339009	2339382			12	5	7	89	0	89	19	0	19	85	0	85	49	0	49	47	0	47	76	0	76	36	32	4	17	0	17
chr1	2339267	5.27764e-06	0.000842583			Intergenic			2339009	2339382			10	6	4	94	81	13	35	17	18	88	80	8	59	47	12	75	42	33	100	72	28	32	4	28	20	16	4
chr1	2350799	3.47593e-28	8.75346e-25			Intergenic			2350777	2351049			11	7	4	115	1	114	45	1	44	72	1	71	37	1	36	73	1	72	76	0	76	86	80	6	18	0	18
chr1	2350818	1.60186e-11	7.28916e-09			Intergenic			2350777	2351049			24	20	4	90	2	88	28	0	28	73	0	73	24	0	24	43	0	43	84	0	84	74	72	2	10	0	10
chr1	2350841	1.99597e-31	6.99458e-28			Intergenic			2350777	2351049			11	6	5	115	0	115	45	0	45	72	0	72	37	0	37	73	0	73	76	1	75	87	76	11	18	0	18
chr1	2403367	6.89281e-07	0.000140136			Intergenic					2403199	2404043	23	15	8	225	102	123	57	15	42	112	50	62	71	33	38	115	60	55	128	78	50	90	73	17	14	5	9
chr1	2405391	2.96141e-06	0.000510402			Intergenic			2404985	2405494			11	2	9	107	8	99	33	2	31	57	3	54	39	1	38	33	1	32	76	8	68	126	40	86	10	0	10
chr1	2405431	9.72625e-33	3.87817e-29			Intergenic			2404985	2405494			10	6	4	106	0	106	33	0	33	55	0	55	38	0	38	33	0	33	76	0	76	85	78	7	10	0	10
chr1	2405494	4.05027e-06	0.00066933			Intergenic			2404985	2405494			18	8	10	106	101	5	33	28	5	55	46	9	37	34	3	33	30	3	76	73	3	152	86	66	10	9	1
chr1	2407161	1.47685e-08	4.20041e-06			Intergenic			2407160	2407382			30	9	21	75	7	68	10	1	9	64	7	57	28	1	27	17	2	15	62	2	60	116	71	45	16	0	16
chr1	2418690	6.54122e-08	1.64761e-05			Intergenic			2418355	2419534			24	13	11	129	126	3	26	24	2	60	53	7	23	22	1	96	92	4	100	97	3	53	4	49	19	19	0
chr1	2418856	1.97677e-10	7.6136e-08			Intergenic			2418355	2419534			10	3	7	96	88	8	33	27	6	49	43	6	23	20	3	48	41	7	68	61	7	57	4	53	10	9	1
chr1	2422499	1.86822e-17	1.72159e-14			Intergenic					2422043	2422788	13	7	6	102	96	6	36	32	4	59	54	5	29	22	7	40	37	3	77	72	5	74	3	71	15	14	1
chr1	2439373	4.16697e-07	8.88565e-05			Intergenic					2436965	2439766	12	3	9	85	9	76	55	25	30	70	11	59	39	17	22	78	38	40	110	55	55	97	42	55	25	8	17
chr1	2439851	3.17214e-11	1.3744e-08			Intergenic			2439767	2440094			25	10	15	92	90	2	20	19	1	82	78	4	39	38	1	61	60	1	69	66	3	60	1	59	13	13	0
chr1	2459507	1.83507e-12	9.52402e-10			Intergenic					2457973	2459972	10	7	3	67	61	6	19	14	5	59	53	6	31	28	3	48	45	3	71	65	6	62	2	60	15	14	1
chr1	2459508	9.04181e-19	9.66357e-16			Intergenic					2457973	2459972	22	14	8	87	83	4	36	35	1	102	87	15	50	45	5	69	63	6	107	100	7	82	2	80	16	15	1
chr1	2467501	6.77423e-41	5.656e-37			Intergenic							12	11	1	117	117	0	63	61	2	125	121	4	44	44	0	113	105	8	116	111	5	80	2	78	26	24	2
chr1	2473902	1.35529e-05	0.00189421			Intergenic					2472518	2474517	11	4	7	62	43	19	23	13	10	43	37	6	36	21	15	56	35	21	58	39	19	56	1	55	10	9	1
chr1	2473990	1.88698e-05	0.00250907			Intergenic					2472518	2474517	11	5	6	62	42	20	23	14	9	43	33	10	36	22	14	56	36	20	58	39	19	56	0	56	11	10	1
chr1	2478931	2.40157e-07	5.3851e-05			Intergenic					2477476	2479475	19	16	3	131	127	4	56	55	1	71	66	5	51	48	3	76	73	3	95	93	2	110	74	36	13	13	0
chr1	2484147	4.70036e-12	2.30033e-09			Intergenic					2484041	2487716	11	7	4	102	89	13	56	10	46	52	36	16	41	24	17	80	13	67	103	43	60	84	29	55	16	6	10
chr1	2484853	2.68097e-06	0.000467552			Intergenic					2484041	2487716	12	2	10	129	7	122	37	13	24	91	17	74	66	16	50	50	15	35	112	28	84	97	35	62	16	3	13
chr1	2486199	1.01933e-07	2.47687e-05			Intergenic					2484041	2487716	12	4	8	147	120	27	45	33	12	81	68	13	35	32	3	103	85	18	86	74	12	70	3	67	11	11	0
chr1	2502584	2.52771e-10	9.58713e-08			Intergenic					2502109	2503907	16	8	8	124	121	3	62	58	4	101	98	3	43	42	1	130	124	6	120	115	5	48	2	46	32	30	2
chr1	2502585	4.77601e-27	1.10438e-23			Intergenic					2502109	2503907	15	10	5	140	132	8	75	71	4	131	121	10	39	39	0	119	112	7	139	135	4	99	2	97	26	25	1
chr1	2505623	7.99918e-05	0.00821656			Intergenic			2505622	2507517			12	7	5	48	8	40	15	12	3	73	48	25	27	0	27	61	53	8	90	70	20	33	7	26	20	16	4
chr1	2512746	4.62369e-05	0.00528537			Intergenic			2512345	2512830			18	11	7	48	39	9	24	21	3	56	45	11	37	27	10	47	43	4	53	43	10	112	48	64	14	12	2
chr1	2516836	6.66013e-05	0.00712056			Intergenic					2514756	2517832	15	4	11	93	12	81	37	23	14	95	20	75	43	0	43	58	45	13	68	24	44	63	24	39	20	8	12
chr1	2520078	1.97765e-09	6.51557e-07			Intergenic			2519461	2522548			15	7	8	183	56	127	44	33	11	124	58	66	62	28	34	105	64	41	131	61	70	75	68	7	16	7	9
chr1	2546340	3.61292e-12	1.79785e-09	NM_001244864	MPC1	Intron	2541700	2551154			2544936	2546935	12	4	8	76	73	3	48	44	4	90	83	7	32	30	2	91	87	4	75	70	5	56	1	55	17	16	1
chr1	2546341	2.17795e-19	2.54409e-16	NM_001244864	MPC1	Intron	2541700	2551154			2544936	2546935	18	9	9	93	86	7	36	36	0	95	87	8	40	35	5	70	67	3	91	84	7	80	1	79	19	16	3
chr1	2546344	6.86439e-16	5.28768e-13	NM_001244864	MPC1	Intron	2541700	2551154			2544936	2546935	18	9	9	93	76	17	36	33	3	96	84	12	40	32	8	70	60	10	91	68	23	80	0	80	19	15	4
chr1	2560173	3.06072e-24	5.72582e-21			Intergenic							13	5	8	101	0	101	25	0	25	60	0	60	53	0	53	47	0	47	62	0	62	65	56	9	13	0	13
chr1	2570986	5.49013e-05	0.00607431			Intergenic					2570553	2572552	14	4	10	57	5	52	23	19	4	69	4	65	42	5	37	42	25	17	65	21	44	45	21	24	17	8	9
chr1	2579922	4.85654e-06	0.000783827	NM_001244534	SFT2D1	Intron	2576955	2585688					13	0	13	81	0	81	73	0	73	81	0	81	37	0	37	126	0	126	100	0	100	11	8	3	32	0	32
chr1	2579968	5.88705e-05	0.00644358	NM_001244534	SFT2D1	Intron	2576955	2585688					15	2	13	81	8	73	74	7	67	81	3	78	37	2	35	128	8	120	100	10	90	43	29	14	32	2	30
chr1	2638281	2.90403e-18	2.92766e-15			Intergenic							12	7	5	113	0	113	46	0	46	55	0	55	51	0	51	61	0	61	88	0	88	84	56	28	14	0	14
chr1	2648268	5.40848e-09	1.66544e-06			Intergenic							33	19	14	78	1	77	10	0	10	60	0	60	38	0	38	51	1	50	113	0	113	92	79	13	21	0	21
chr1	3159532	5.63609e-05	0.00621259			Intergenic			3159291	3159629			14	7	7	52	46	6	40	15	25	59	50	9	21	16	5	103	29	74	62	27	35	75	46	29	12	4	8
chr1	3322320	4.08574e-05	0.00476812			Intergenic							16	0	16	81	0	81	34	0	34	60	49	11	36	12	24	84	76	8	102	42	60	65	1	64	19	8	11
chr1	3322349	1.96549e-05	0.00260039			Intergenic							16	5	11	81	41	40	34	16	18	60	54	6	36	22	14	82	78	4	102	76	26	65	45	20	19	12	7
chr1	3385006	9.16323e-09	2.71286e-06			Intergenic			3384266	3385122			21	0	21	134	1	133	59	2	57	91	90	1	32	18	14	81	80	1	103	51	52	67	1	66	16	3	13
chr1	3385007	4.04461e-10	1.48165e-07			Intergenic			3384266	3385122			14	0	14	138	0	138	33	0	33	90	84	6	37	15	22	83	83	0	84	40	44	72	4	68	12	7	5
chr1	3385018	4.6236e-09	1.44015e-06			Intergenic			3384266	3385122			21	0	21	134	0	134	59	0	59	91	89	2	32	18	14	81	78	3	103	50	53	67	1	66	16	3	13
chr1	3385019	8.44685e-10	2.94761e-07			Intergenic			3384266	3385122			14	0	14	138	1	137	33	0	33	90	85	5	37	14	23	83	82	1	84	39	45	72	4	68	12	8	4
chr1	3417428	1.6193e-09	5.41237e-07			Intergenic							10	7	3	68	57	11	36	30	6	64	37	27	38	22	16	59	31	28	95	53	42	120	46	74	19	12	7
chr1	3580935	4.35319e-08	1.13486e-05			Intergenic							30	26	4	89	75	14	52	48	4	30	0	30	41	12	29	84	0	84	81	26	55	87	70	17	29	16	13
chr1	4545548	2.76375e-17	2.49328e-14			Intergenic							14	2	12	168	1	167	60	0	60	54	47	7	49	12	37	39	35	4	90	31	59	94	36	58	14	6	8
chr1	4546188	2.15394e-08	5.93225e-06			Intergenic							13	7	6	77	6	71	20	0	20	79	64	15	68	23	45	57	37	20	53	29	24	69	43	26	13	6	7
chr1	4546189	1.46956e-07	3.44681e-05			Intergenic							16	15	1	239	233	6	89	84	5	137	70	67	88	61	27	115	58	57	152	95	57	120	119	1	25	17	8
chr1	4938727	5.07509e-05	0.00570285			Intergenic							10	9	1	112	107	5	11	10	1	106	94	12	22	21	1	50	45	5	88	80	8	76	55	21	26	20	6
chr1	5285552	6.1924e-08	1.56928e-05			Intergenic							20	9	11	110	1	109	41	17	24	63	30	33	37	36	1	97	94	3	85	46	39	57	1	56	10	4	6
chr1	5797410	4.08536e-06	0.000673606	NM_001044603	PRKN	Intron	5698674	5858869					20	15	5	61	59	2	31	15	16	77	29	48	46	21	25	70	69	1	93	86	7	101	89	12	18	16	2
chr1	6302059	6.95463e-05	0.00736893	NM_001044603	PRKN	Intron	6291290	6511281					17	5	12	93	17	76	18	3	15	56	2	54	42	3	39	25	0	25	75	9	66	55	1	54	23	0	23
chr1	6302118	5.92025e-05	0.00647306	NM_001044603	PRKN	Intron	6291290	6511281					18	15	3	93	90	3	18	16	2	57	19	38	42	23	19	25	1	24	75	52	23	55	41	14	23	13	10
chr1	6644786	5.54773e-08	1.41892e-05	NM_001044603	PRKN	Intron	6525253	6692614					20	5	15	89	58	31	47	0	47	92	32	60	44	0	44	70	0	70	82	24	58	84	17	67	23	3	20
chr1	6648421	4.12896e-12	2.03591e-09	NM_001044603	PRKN	Intron	6525253	6692614					15	10	5	85	76	9	25	0	25	98	80	18	27	0	27	54	1	53	97	45	52	50	14	36	18	13	5
chr1	6674983	7.82744e-06	0.0011842	NM_001044603	PRKN	Intron	6525253	6692614					26	12	14	81	42	39	21	0	21	92	48	44	41	24	17	88	78	10	106	89	17	85	48	37	25	12	13
chr1	6674984	6.74344e-06	0.00104187	NM_001044603	PRKN	Intron	6525253	6692614					11	5	6	102	46	56	36	0	36	91	43	48	32	13	19	82	76	6	103	91	12	72	22	50	24	11	13
chr1	6679460	1.96879e-10	7.58756e-08	NM_001044603	PRKN	Intron	6525253	6692614					32	14	18	75	33	42	62	58	4	81	33	48	36	20	16	98	0	98	111	0	111	104	48	56	27	12	15
chr1	6703177	3.89555e-12	1.93077e-09	NM_001044603	PRKN	Intron	6692699	6724332					12	0	12	80	43	37	17	0	17	61	27	34	49	20	29	35	34	1	69	34	35	43	41	2	23	23	0
chr1	6732890	2.11984e-18	2.17768e-15			Intergenic							16	14	2	104	60	44	50	41	9	52	42	10	48	15	33	58	0	58	72	24	48	78	20	58	12	3	9
chr1	6747346	4.79805e-07	0.000101066			Intergenic							17	8	9	46	28	18	21	14	7	25	17	8	62	17	45	106	15	91	93	29	64	78	23	55	18	5	13
chr1	6860992	1.30236e-09	4.40988e-07	NM_001143697	AGPAT4	Intron	6807980	6864826					13	9	4	135	129	6	45	30	15	67	49	18	55	38	17	84	50	34	106	73	33	93	53	40	17	11	6
chr1	6860993	6.65318e-06	0.00102933	NM_001143697	AGPAT4	Intron	6807980	6864826					13	9	4	40	13	27	31	20	11	31	18	13	61	26	35	64	53	11	71	59	12	85	57	28	15	13	2
chr1	6883959	2.02496e-07	4.61211e-05			Intergenic			6883621	6884602			15	9	6	154	53	101	27	20	7	143	72	71	65	30	35	45	31	14	150	91	59	94	65	29	26	16	10
chr1	6905452	9.05381e-08	2.222e-05			Intergenic			6905351	6905631			23	10	13	99	7	92	35	27	8	63	36	27	32	4	28	84	49	35	85	45	40	37	21	16	24	14	10
chr1	6919231	7.96588e-06	0.00120237			Intergenic							15	0	15	84	0	84	45	0	45	72	0	72	26	12	14	93	90	3	85	0	85	73	0	73	13	3	10
chr1	6919232	6.70567e-06	0.00103655			Intergenic							17	0	17	69	0	69	45	0	45	54	0	54	37	16	21	64	62	2	73	0	73	65	0	65	16	8	8
chr1	7049499	9.10511e-05	0.00910909			Intergenic			7049197	7049872			15	0	15	68	0	68	20	0	20	36	0	36	14	0	14	66	0	66	43	0	43	31	2	29	13	2	11
chr1	7382102	1.97943e-05	0.00261661	NM_001244473	IGF2R	Intron	7381445	7382164	7382093	7382520			20	16	4	104	97	7	47	32	15	72	58	14	47	28	19	80	56	24	90	59	31	104	75	29	13	6	7
chr1	7382103	4.94108e-09	1.53099e-06	NM_001244473	IGF2R	Intron	7381445	7382164	7382093	7382520			31	7	24	122	20	102	35	25	10	69	15	54	57	14	43	62	28	34	96	53	43	95	47	48	19	9	10
chr1	7430593	2.18462e-08	6.00742e-06	NM_001244473	IGF2R	Intron	7429840	7430656	7430428	7431535			12	4	8	87	43	44	25	25	0	72	38	34	33	33	0	53	53	0	57	25	32	56	55	1	10	10	0
chr1	7436516	1.34351e-10	5.32795e-08	NM_001244473	IGF2R	Intron	7435906	7437106			7434424	7437078	11	4	7	54	50	4	20	15	5	75	55	20	58	33	25	69	30	39	83	37	46	87	32	55	13	9	4
chr1	7440252	7.7009e-06	0.00116761	NM_001244473	IGF2R	Intron	7437240	7441990			7437517	7441514	24	4	20	104	50	54	51	6	45	111	42	69	78	30	48	77	14	63	113	22	91	100	16	84	21	4	17
chr1	7447579	3.2425e-06	0.000552501	NM_001244473	IGF2R	Intron	7444064	7452879	7446389	7448785			24	5	19	73	24	49	66	15	51	85	37	48	37	5	32	90	13	77	103	5	98	71	12	59	28	4	24
chr1	7447581	2.14576e-05	0.00279901	NM_001244473	IGF2R	Intron	7444064	7452879	7446389	7448785			24	5	19	73	24	49	65	11	54	85	42	43	36	5	31	90	11	79	103	6	97	71	14	57	28	4	24
chr1	7447585	4.77611e-06	0.000772451	NM_001244473	IGF2R	Intron	7444064	7452879	7446389	7448785			24	5	19	73	25	48	66	15	51	85	40	45	37	5	32	90	11	79	103	5	98	71	15	56	28	4	24
chr1	7447594	3.00999e-06	0.000518062	NM_001244473	IGF2R	Intron	7444064	7452879	7446389	7448785			24	5	19	73	25	48	66	14	52	85	37	48	37	4	33	90	11	79	103	5	98	71	13	58	28	4	24
chr1	7447607	1.85938e-05	0.00247767	NM_001244473	IGF2R	Intron	7444064	7452879	7446389	7448785			24	5	19	73	24	49	66	14	52	85	39	46	37	5	32	90	10	80	103	5	98	71	13	58	28	6	22
chr1	7447609	8.75018e-06	0.00130632	NM_001244473	IGF2R	Intron	7444064	7452879	7446389	7448785			24	5	19	73	24	49	66	14	52	85	36	49	37	5	32	90	11	79	103	5	98	71	12	59	28	5	23
chr1	7447613	4.8257e-05	0.00546955	NM_001244473	IGF2R	Intron	7444064	7452879	7446389	7448785			24	5	19	73	23	50	66	14	52	85	37	48	37	5	32	90	11	79	103	5	98	71	14	57	28	5	23
chr1	7447616	9.61683e-05	0.00952831	NM_001244473	IGF2R	Intron	7444064	7452879	7446389	7448785			24	5	19	73	25	48	66	17	49	85	42	43	37	6	31	89	15	74	103	5	98	70	16	54	28	7	21
chr1	7544602	2.39536e-06	0.000423526			Intergenic							19	8	11	64	19	45	66	0	66	99	44	55	42	1	41	101	0	101	102	29	73	75	0	75	17	0	17
chr1	7544603	4.97338e-07	0.000104512			Intergenic							20	12	8	82	28	54	56	0	56	83	32	51	42	0	42	64	0	64	89	33	56	72	0	72	25	0	25
chr1	7608165	6.93104e-05	0.00734769			Intergenic							18	10	8	94	78	16	48	39	9	122	82	40	51	23	28	99	58	41	113	64	49	136	82	54	20	11	9
chr1	7896040	2.30776e-05	0.00297292			Intergenic					7895711	7897710	21	10	11	84	51	33	90	65	25	96	66	30	40	30	10	173	117	56	91	1	90	68	35	33	35	24	11
chr1	7919947	2.58499e-05	0.00326315			Intergenic							19	12	7	27	15	12	14	13	1	74	71	3	34	33	1	33	29	4	45	0	45	41	18	23	18	18	0
chr1	8167025	7.11784e-05	0.00750479			Intergenic							14	5	9	40	26	14	29	7	22	38	20	18	29	12	17	46	9	37	54	7	47	42	15	27	11	2	9
chr1	8167030	5.14113e-06	0.0008242			Intergenic							14	5	9	40	27	13	29	4	25	37	20	17	29	10	19	46	7	39	54	8	46	42	12	30	11	1	10
chr1	8167060	9.82585e-05	0.0096868			Intergenic							13	5	8	40	21	19	29	3	26	38	16	22	29	10	19	46	3	43	53	9	44	42	5	37	10	4	6
chr1	8217504	7.43584e-05	0.0077644	NM_001243543	TAGAP	Exon	8216705	8217993	8215314	8218708			12	3	9	76	51	25	31	9	22	60	41	19	48	26	22	61	24	37	96	33	63	87	32	55	14	5	9
chr1	8217660	2.23673e-07	5.05283e-05	NM_001243543	TAGAP	Exon	8216705	8217993	8215314	8218708			28	6	22	145	57	88	56	22	34	78	27	51	55	13	42	151	37	114	113	16	97	104	14	90	34	8	26
chr1	8479706	2.55111e-05	0.00322681			Intergenic							22	0	22	96	87	9	39	36	3	85	40	45	46	43	3	97	46	51	93	40	53	67	28	39	14	14	0
chr1	8513338	2.62366e-05	0.00330058			Intergenic							17	17	0	79	31	48	30	0	30	75	31	44	55	0	55	68	26	42	76	40	36	70	65	5	27	10	17
chr1	8575188	4.05901e-06	0.000670417			Intergenic					8573947	8575946	16	0	16	136	66	70	11	11	0	83	40	43	47	45	2	38	17	21	72	25	47	75	1	74	13	5	8
chr1	8635996	5.92716e-05	0.0064789			Intergenic			8635026	8636014			13	0	13	50	0	50	45	0	45	51	1	50	36	0	36	64	0	64	82	1	81	63	9	54	10	0	10
chr1	8696509	2.88933e-06	0.000498952			Intergenic			8696344	8696717			34	33	1	108	52	56	67	0	67	92	45	47	45	0	45	107	54	53	125	67	58	97	91	6	38	19	19
chr1	8741800	3.62786e-06	0.000609351			Intergenic			8741598	8741900			15	2	13	89	15	74	36	2	34	107	15	92	31	4	27	77	3	74	110	0	110	91	3	88	17	1	16
chr1	9035072	1.81903e-06	0.000331616			Intergenic					9033220	9035219	23	12	11	105	85	20	29	23	6	123	86	37	57	33	24	68	54	14	124	66	58	122	56	66	26	18	8
chr1	9060770	9.34184e-05	0.009307			Intergenic			9060652	9060874			23	3	20	65	4	61	39	29	10	97	13	84	51	3	48	87	61	26	68	32	36	102	36	66	21	2	19
chr1	9083355	3.55157e-09	1.12339e-06			Intergenic			9082613	9083366			17	15	2	106	38	68	35	0	35	76	33	43	37	15	22	68	33	35	109	52	57	63	56	7	13	13	0
chr1	9083356	1.97932e-07	4.5214e-05			Intergenic			9082613	9083366			11	8	3	83	40	43	25	0	25	57	36	21	33	21	12	48	25	23	71	38	33	66	59	7	17	16	1
chr1	9099605	4.80939e-05	0.00545598			Intergenic							28	0	28	95	44	51	35	33	2	73	29	44	46	19	27	92	44	48	88	42	46	73	0	73	18	0	18
chr1	9099606	2.42977e-12	1.24239e-09			Intergenic							11	0	11	86	44	42	29	28	1	94	50	44	39	18	21	69	39	30	87	28	59	71	1	70	21	1	20
chr1	9340880	2.00274e-07	4.56902e-05			Intergenic							24	18	6	159	138	21	46	24	22	87	62	25	46	28	18	101	67	34	154	83	71	135	80	55	24	17	7
chr1	9351936	1.63324e-10	6.37533e-08			Intergenic							27	26	1	100	88	12	75	0	75	106	44	62	40	19	21	123	57	66	108	102	6	107	100	7	33	30	3
chr1	9524848	5.39207e-06	0.000858455			Intergenic			9524611	9525037			12	11	1	85	79	6	32	31	1	85	75	10	35	33	2	70	57	13	79	54	25	54	43	11	16	12	4
chr1	9524948	3.51517e-07	7.60261e-05			Intergenic			9524611	9525037			18	17	1	93	90	3	29	27	2	76	71	5	36	30	6	56	46	10	85	75	10	81	62	19	18	11	7
chr1	9524990	5.55218e-05	0.00613152			Intergenic			9524611	9525037			18	13	5	93	80	13	29	28	1	76	64	12	36	29	7	56	36	20	85	62	23	81	53	28	18	12	6
chr1	9524996	2.0083e-05	0.00264774			Intergenic			9524611	9525037			18	16	2	93	89	4	29	29	0	76	71	5	36	33	3	56	51	5	85	71	14	81	66	15	18	13	5
chr1	9525005	3.2741e-05	0.00395795			Intergenic			9524611	9525037			18	17	1	92	91	1	29	29	0	76	69	7	36	32	4	56	52	4	85	78	7	81	68	13	17	12	5
chr1	9596445	1.9731e-18	2.03197e-15			Intergenic							19	0	19	84	33	51	47	0	47	91	40	51	25	0	25	82	39	43	94	48	46	89	79	10	12	6	6
chr1	9620216	0.000101763	0.0099515			Intergenic			9619043	9621873			21	1	20	159	11	148	82	1	81	117	3	114	82	0	82	146	3	143	142	0	142	140	0	140	30	1	29
chr1	9648356	2.26142e-10	8.62713e-08			Intergenic							12	9	3	109	102	7	46	41	5	66	31	35	38	34	4	65	40	25	86	75	11	67	20	47	14	8	6
chr1	9648357	1.75037e-09	5.81453e-07			Intergenic							18	17	1	108	107	1	62	57	5	83	31	52	34	33	1	75	36	39	102	96	6	109	56	53	21	12	9
chr1	9779272	2.39249e-05	0.00306242			Intergenic					9778309	9780308	11	10	1	43	41	2	42	38	4	115	77	38	37	36	1	96	62	34	33	33	0	76	48	28	28	14	14
chr1	9809630	7.66149e-21	1.04395e-17			Intergenic							20	18	2	141	133	8	41	39	2	94	43	51	40	36	4	102	61	41	134	129	5	88	4	84	15	6	9
chr1	9935192	2.86055e-06	0.000494601			Intergenic							11	11	0	102	94	8	29	22	7	60	47	13	31	12	19	47	20	27	61	59	2	34	13	21	19	14	5
chr1	10301629	1.25227e-05	0.00177253			Intergenic							14	0	14	78	1	77	11	0	11	62	0	62	39	19	20	16	7	9	60	0	60	24	15	9	18	0	18
chr1	11572676	1.34454e-06	0.000254128	NM_001128475	TFB1M	Intron	11569233	11584816					12	0	12	50	0	50	14	0	14	39	0	39	33	16	17	28	9	19	46	0	46	50	23	27	12	0	12
chr1	11664966	1.32126e-10	5.24643e-08			Intergenic							17	0	17	88	1	87	32	0	32	49	0	49	41	21	20	48	25	23	59	0	59	62	30	32	16	0	16
chr1	11675007	3.93348e-10	1.44476e-07			Intergenic							10	0	10	65	3	62	37	1	36	61	4	57	39	21	18	42	23	19	71	11	60	43	27	16	13	0	13
chr1	12561302	1.23923e-07	2.95054e-05			Intergenic							28	17	11	75	72	3	29	29	0	86	79	7	38	19	19	82	5	77	75	74	1	76	36	40	17	17	0
chr1	14103717	6.52949e-06	0.00101297			Intergenic							13	0	13	54	52	2	41	40	1	69	66	3	37	17	20	59	25	34	65	34	31	36	21	15	13	12	1
chr1	14912456	2.42283e-05	0.00309552			Intergenic			14910298	14912886			14	2	12	106	52	54	39	3	36	91	40	51	44	14	30	69	5	64	110	20	90	75	17	58	13	5	8
chr1	14912490	8.10522e-10	2.84275e-07			Intergenic			14910298	14912886			13	2	11	92	52	40	37	7	30	79	46	33	30	14	16	68	6	62	102	20	82	69	11	58	12	4	8
chr1	14912495	3.00616e-10	1.12577e-07			Intergenic			14910298	14912886			13	2	11	92	52	40	40	6	34	79	45	34	30	14	16	68	7	61	102	19	83	69	10	59	12	3	9
chr1	14912501	2.31841e-08	6.34449e-06			Intergenic			14910298	14912886			13	2	11	92	55	37	40	6	34	79	48	31	30	15	15	68	10	58	102	24	78	69	13	56	12	4	8
chr1	15349139	4.93337e-06	0.000795196			Intergenic							19	17	2	74	1	73	33	0	33	60	32	28	31	19	12	65	31	34	71	39	32	57	40	17	22	0	22
chr1	15609613	2.7961e-06	0.000484871			Intergenic							22	21	1	87	2	85	15	11	4	60	33	27	37	15	22	66	32	34	103	48	55	61	57	4	16	0	16
chr1	16128137	3.1659e-05	0.00385411			Intergenic			16127475	16128219			21	0	21	64	6	58	48	5	43	79	6	73	26	4	22	78	11	67	86	11	75	57	19	38	24	6	18
chr1	16497457	1.87353e-05	0.00249385			Intergenic			16497292	16497876			26	2	24	93	22	71	44	5	39	75	32	43	40	8	32	68	9	59	78	20	58	60	41	19	10	3	7
chr1	16497469	5.05212e-05	0.00568027			Intergenic			16497292	16497876			26	2	24	93	15	78	44	4	40	76	26	50	39	6	33	68	6	62	78	24	54	60	29	31	10	2	8
chr1	17438457	4.59533e-11	1.94647e-08			Intergenic							13	1	12	93	16	77	20	10	10	79	17	62	74	27	47	37	29	8	58	35	23	33	12	21	35	21	14
chr1	20833277	6.94245e-06	0.00106811			Intergenic							23	7	16	83	1	82	10	10	0	80	33	47	42	14	28	42	21	21	101	56	45	70	31	39	19	0	19
chr1	21986407	3.65436e-05	0.00434293			Intergenic							11	10	1	87	44	43	30	28	2	55	51	4	34	32	2	46	22	24	57	19	38	74	34	40	14	8	6
chr1	22678304	1.01405e-12	5.42357e-10			Intergenic							14	2	12	77	29	48	27	7	20	102	61	41	48	24	24	33	7	26	67	62	5	48	45	3	20	9	11
chr1	22678338	1.69305e-05	0.00228218			Intergenic							13	11	2	87	77	10	48	44	4	78	59	19	58	41	17	52	48	4	95	69	26	94	55	39	12	11	1
chr1	25223406	4.16602e-05	0.00484572			Intergenic							28	24	4	74	32	42	33	31	2	68	55	13	38	31	7	67	64	3	105	37	68	71	37	34	23	7	16
chr1	26492231	6.08211e-06	0.000953382			Intergenic							24	10	14	94	52	42	32	15	17	76	0	76	42	24	18	84	81	3	107	0	107	84	4	80	25	15	10
chr1	27553343	1.06076e-14	7.13312e-12			Intergenic							15	13	2	69	38	31	28	22	6	26	2	24	37	34	3	75	73	2	75	65	10	77	76	1	14	14	0
chr1	27553359	8.89978e-17	7.52665e-14			Intergenic							13	13	0	68	38	30	28	22	6	26	0	26	37	37	0	74	73	1	74	71	3	77	75	2	14	14	0
chr1	27684015	2.38117e-06	0.000421316			Intergenic							14	12	2	49	35	14	15	8	7	44	21	23	40	33	7	34	23	11	48	18	30	40	18	22	13	0	13
chr1	28480113	2.10122e-36	1.18281e-32			Intergenic							15	1	14	87	0	87	14	0	14	82	1	81	39	0	39	60	0	60	96	36	60	71	35	36	15	12	3
chr1	29114591	5.45797e-18	5.34221e-15			Intergenic							14	9	5	90	90	0	42	37	5	46	45	1	47	45	2	23	21	2	77	34	43	34	11	23	12	12	0
chr1	29154626	1.92602e-13	1.1228e-10			Intergenic							24	10	14	80	38	42	17	16	1	42	40	2	42	0	42	77	34	43	117	109	8	77	74	3	16	15	1
chr1	29643963	5.77902e-09	1.77034e-06			Intergenic							15	1	14	73	8	65	17	0	17	69	3	66	44	1	43	81	46	35	78	30	48	68	23	45	21	2	19
chr1	30843023	3.00627e-16	2.40664e-13			Intergenic							13	11	2	69	37	32	35	0	35	45	21	24	43	35	8	64	57	7	68	61	7	47	43	4	14	12	2
chr1	30907561	1.22989e-25	2.60209e-22			Intergenic							15	11	4	127	56	71	41	0	41	99	32	67	42	28	14	87	78	9	98	85	13	109	87	22	24	20	4
chr1	30907562	5.57164e-20	6.89688e-17			Intergenic							10	7	3	80	36	44	24	0	24	49	15	34	23	20	3	40	34	6	62	54	8	75	69	6	10	8	2
chr1	31009948	1.89129e-37	1.16478e-33	NM_214133	VNN1	Intron	31005455	31015432					19	0	19	84	0	84	17	0	17	78	1	77	37	0	37	54	49	5	112	58	54	69	33	36	16	11	5
chr1	31164985	1.15465e-06	0.000221603			Intergenic							15	0	15	62	23	39	21	19	2	34	11	23	38	0	38	41	19	22	51	50	1	39	23	16	11	5	6
chr1	31796460	4.75367e-05	0.00540169			Intergenic			31796141	31797056			21	0	21	157	4	153	71	1	70	126	1	125	56	1	55	130	4	126	148	2	146	126	15	111	35	4	31
chr1	32974412	3.22903e-08	8.61106e-06			Intergenic							21	1	20	131	17	114	18	2	16	78	7	71	37	0	37	70	13	57	136	58	78	79	17	62	33	10	23
chr1	36619632	2.36452e-07	5.31352e-05			Intergenic							11	2	9	59	41	18	16	8	8	32	20	12	36	22	14	55	33	22	69	63	6	76	68	8	11	9	2
chr1	36619663	6.02709e-06	0.000946234			Intergenic							11	3	8	59	40	19	16	9	7	32	23	9	36	21	15	55	34	21	69	64	5	76	65	11	11	9	2
chr1	37193995	2.09231e-05	0.00274108			Intergenic			37193281	37194311			44	3	41	129	10	119	94	4	90	120	6	114	57	0	57	145	2	143	132	1	131	122	0	122	33	1	32
chr1	37717285	3.12417e-14	2.0065e-11			Intergenic							11	7	4	116	55	61	55	53	2	53	46	7	40	35	5	72	0	72	89	1	88	93	43	50	14	6	8
chr1	37737935	6.54326e-06	0.00101485			Intergenic							12	3	9	63	63	0	10	8	2	81	74	7	41	35	6	44	16	28	31	0	31	28	27	1	10	10	0
chr1	38586077	3.47355e-10	1.28379e-07			Intergenic							16	7	9	74	37	37	13	0	13	69	0	69	46	21	25	29	13	16	81	0	81	54	1	53	10	3	7
chr1	40909125	7.70136e-08	1.91617e-05			Intergenic							20	10	10	72	71	1	23	22	1	46	25	21	36	34	2	52	16	36	100	57	43	51	22	29	16	15	1
chr1	46905442	8.53654e-14	5.21091e-11			Intergenic							14	6	8	76	73	3	20	18	2	66	61	5	32	28	4	51	46	5	100	44	56	87	39	48	15	15	0
chr1	51041229	4.15405e-06	0.000683664			Intergenic			51040040	51041845			25	0	25	86	0	86	56	0	56	67	0	67	44	0	44	97	0	97	89	0	89	66	7	59	22	1	21
chr1	51356774	1.9691e-16	1.61693e-13			Intergenic							10	4	6	66	63	3	46	43	3	52	48	4	26	1	25	85	75	10	86	40	46	31	13	18	13	0	13
chr1	53358016	1.88509e-09	6.23207e-07			Intergenic							26	0	26	97	44	53	29	0	29	109	48	61	32	0	32	81	38	43	119	0	119	71	5	66	20	0	20
chr1	53444890	3.29079e-05	0.00397194			Intergenic							20	10	10	53	16	37	50	34	16	46	20	26	58	23	35	62	38	24	115	78	37	82	51	31	17	14	3
chr1	56069824	6.40194e-05	0.00689728			Promoter	56068582	56070582	56069203	56070356			17	0	17	71	1	70	41	0	41	52	3	49	29	1	28	92	1	91	88	7	81	53	6	47	17	4	13
chr1	57074951	6.73151e-15	4.62668e-12			Intergenic							20	20	0	80	77	3	37	32	5	83	80	3	30	28	2	51	25	26	92	57	35	61	40	21	13	10	3
chr1	57074952	2.6405e-16	2.13028e-13			Intergenic							10	10	0	42	40	2	11	11	0	28	25	3	33	31	2	38	15	23	41	20	21	48	22	26	15	6	9
chr1	57077365	1.55503e-05	0.00212655			Intergenic							15	6	9	122	105	17	12	9	3	96	57	39	74	37	37	23	13	10	89	51	38	108	59	49	10	5	5
chr1	57275257	2.56809e-07	5.71931e-05			Intergenic							14	10	4	14	13	1	16	13	3	47	30	17	12	7	5	84	42	42	49	17	32	36	15	21	26	9	17
chr1	60337366	1.46691e-06	0.000274462			Intergenic							26	7	19	85	28	57	22	0	22	59	29	30	30	0	30	55	52	3	60	22	38	49	25	24	13	11	2
chr1	60337386	2.4055e-09	7.81344e-07			Intergenic							26	19	7	85	72	13	22	14	8	61	57	4	30	28	2	55	24	31	60	34	26	49	22	27	13	7	6
chr1	61095819	9.42116e-09	2.78128e-06			Intergenic							16	15	1	257	235	22	95	90	5	116	104	12	60	56	4	146	81	65	277	216	61	189	157	32	43	34	9
chr1	61095831	9.77271e-07	0.000191038			Intergenic							16	16	0	257	203	54	95	91	4	116	107	9	60	58	2	146	113	33	277	262	15	189	186	3	43	39	4
chr1	61412810	2.3743e-07	5.33069e-05			Intergenic							18	0	18	76	0	76	25	0	25	84	33	51	32	0	32	53	44	9	96	0	96	76	31	45	15	7	8
chr1	62340910	4.00847e-06	0.00066295			Intergenic			62340577	62340953			36	19	17	77	61	16	34	11	23	121	25	96	51	38	13	58	1	57	150	63	87	57	18	39	36	10	26
chr1	65845693	6.34638e-05	0.00685107			Intergenic			65845486	65845749			13	1	12	95	14	81	26	1	25	46	0	46	27	0	27	38	0	38	69	0	69	30	2	28	13	0	13
chr1	66535526	8.52678e-05	0.00863666			Intergenic			66535218	66536000			16	0	16	119	1	118	31	0	31	72	0	72	30	0	30	48	0	48	68	0	68	45	9	36	19	0	19
chr1	66545326	7.30315e-05	0.00765733			Intergenic			66544736	66546420			10	0	10	97	8	89	39	0	39	61	1	60	36	0	36	66	0	66	46	0	46	72	0	72	10	0	10
chr1	67066522	4.53993e-06	0.000739056			Intergenic							15	8	7	137	102	35	27	13	14	71	58	13	51	31	20	52	17	35	99	59	40	88	39	49	15	8	7
chr1	67066532	1.59435e-05	0.00217125			Intergenic							15	9	6	137	110	27	27	18	9	71	60	11	51	37	14	52	18	34	99	63	36	88	53	35	15	8	7
chr1	67802581	2.63367e-09	8.48588e-07			Intergenic							11	10	1	126	1	125	68	0	68	118	0	118	51	0	51	101	0	101	136	55	81	82	0	82	32	12	20
chr1	68486126	3.30061e-11	1.42375e-08			Intergenic							20	16	4	71	41	30	18	17	1	86	81	5	40	37	3	68	64	4	112	105	7	75	73	2	22	21	1
chr1	68999211	7.3214e-09	2.20057e-06			Intergenic							23	22	1	88	44	44	60	55	5	86	73	13	31	29	2	98	92	6	103	94	9	72	63	9	16	16	0
chr1	70021511	6.1377e-07	0.000126187			Intergenic							18	11	7	72	49	23	29	13	16	71	55	16	47	29	18	73	41	32	81	21	60	72	30	42	19	9	10
chr1	72006798	1.90518e-07	4.37259e-05			Intergenic							24	11	13	82	21	61	15	1	14	76	17	59	38	4	34	60	5	55	79	12	67	64	3	61	22	0	22
chr1	72331433	6.50784e-05	0.00698656			Intergenic			72330694	72331444			13	2	11	89	45	44	43	9	34	78	44	34	50	18	32	73	13	60	94	19	75	71	21	50	22	5	17
chr1	72349581	2.73358e-15	1.9806e-12			Intergenic							25	22	3	81	79	2	20	16	4	84	76	8	48	45	3	39	37	2	88	43	45	81	42	39	23	21	2
chr1	72887124	1.86647e-08	5.20973e-06			Intergenic							31	12	19	111	58	53	53	23	30	116	51	65	43	22	21	93	37	56	139	15	124	98	28	70	30	10	20
chr1	72887126	2.54049e-06	0.0004459			Intergenic							31	13	18	111	54	57	53	21	32	116	51	65	43	20	23	93	45	48	139	17	122	98	25	73	30	13	17
chr1	72887140	1.77378e-05	0.00237863			Intergenic							31	9	22	111	50	61	53	16	37	115	58	57	43	20	23	93	41	52	139	16	123	98	22	76	30	12	18
chr1	72887157	1.35028e-07	3.1893e-05			Intergenic							31	11	20	110	60	50	53	22	31	116	54	62	43	21	22	93	43	50	139	20	119	97	26	71	30	11	19
chr1	72998398	2.07596e-09	6.80845e-07			Intergenic							25	3	22	129	63	66	63	15	48	145	39	106	79	25	54	131	14	117	189	35	154	94	7	87	28	9	19
chr1	73100441	4.16391e-17	3.67122e-14			Intergenic							24	23	1	71	66	5	20	18	2	84	75	9	45	43	2	69	67	2	119	52	67	76	42	34	16	15	1
chr1	73184225	7.85445e-14	4.82294e-11			Intergenic							11	11	0	101	97	4	29	28	1	40	37	3	36	36	0	42	39	3	75	36	39	65	42	23	15	15	0
chr1	73418195	7.9918e-06	0.0012054	NM_001167653	PDSS2	Intron	73403311	73509966					29	18	11	170	113	57	66	11	55	139	85	54	79	36	43	99	29	70	144	68	76	125	49	76	38	15	23
chr1	73676299	4.73088e-05	0.0053807			Intergenic							12	11	1	85	59	26	39	32	7	46	38	8	37	32	5	53	51	2	74	28	46	55	24	31	12	12	0
chr1	74466799	2.93765e-06	0.000506874			Intergenic							17	10	7	103	82	21	50	38	12	55	46	9	40	27	13	86	64	22	76	26	50	33	17	16	13	10	3
chr1	74737157	2.09555e-07	4.75548e-05	NM_001135959	FOXO3	Exon	74737037	74738437	74737143	74737950			16	10	6	35	32	3	17	5	12	55	47	8	33	20	13	53	32	21	102	46	56	85	32	53	14	10	4
chr1	74737535	4.3339e-07	9.20533e-05	NM_001135959	FOXO3	Exon	74737037	74738437	74737143	74737950			14	3	11	100	13	87	53	47	6	80	12	68	47	2	45	65	49	16	84	44	40	52	28	24	16	6	10
chr1	74737621	1.275e-08	3.6742e-06	NM_001135959	FOXO3	Exon	74737037	74738437	74737143	74737950			14	14	0	101	97	4	53	49	4	80	76	4	46	43	3	66	63	3	84	56	28	52	37	15	16	16	0
chr1	74737628	2.71248e-06	0.000472347	NM_001135959	FOXO3	Exon	74737037	74738437	74737143	74737950			16	13	3	105	102	3	55	51	4	80	75	5	48	39	9	69	63	6	102	85	17	69	47	22	18	16	2
chr1	75009533	6.0317e-22	9.15085e-19			Intergenic							26	26	0	97	92	5	76	71	5	85	70	15	47	44	3	97	94	3	107	49	58	109	55	54	20	20	0
chr1	75009534	1.01806e-08	2.98634e-06			Intergenic							14	14	0	63	60	3	44	40	4	65	51	14	43	38	5	60	57	3	68	29	39	51	32	19	20	19	1
chr1	77601952	4.65609e-05	0.00531226	NM_001080206	FYN	Intron	77596824	77616792					10	9	1	20	14	6	77	50	27	43	33	10	35	16	19	69	49	20	86	43	43	92	34	58	15	12	3
chr1	81317100	2.20797e-09	7.20948e-07			Intergenic							11	0	11	46	2	44	30	0	30	36	0	36	34	14	20	48	0	48	47	20	27	52	23	29	13	0	13
chr1	82923863	2.47314e-05	0.00314751			Intergenic							17	15	2	67	30	37	16	0	16	88	41	47	44	43	1	34	16	18	87	28	59	39	1	38	17	6	11
chr1	86466415	1.98305e-06	0.000357899			Intergenic							16	6	10	78	66	12	46	43	3	75	70	5	40	19	21	74	67	7	82	38	44	64	32	32	16	14	2
chr1	87807247	3.13679e-05	0.00382721			Intergenic					87806146	87808145	15	11	4	53	44	9	27	26	1	48	37	11	33	15	18	54	41	13	78	37	41	54	31	23	17	13	4
chr1	88543884	1.33711e-05	0.00187175			Intergenic							25	25	0	76	73	3	32	28	4	85	80	5	49	45	4	62	61	1	91	80	11	79	60	19	27	22	5
chr1	94661492	5.61308e-05	0.00618997			Intergenic							24	1	23	76	45	31	30	1	29	72	43	29	41	20	21	62	4	58	97	22	75	56	16	40	23	3	20
chr1	94661527	4.19395e-05	0.00487339			Intergenic							24	1	23	76	43	33	30	2	28	72	43	29	41	20	21	62	3	59	96	21	75	56	15	41	23	3	20
chr1	95960197	9.34184e-06	0.00137959			Intergenic							22	16	6	144	83	61	68	62	6	110	69	41	64	38	26	84	67	17	98	80	18	72	61	11	26	23	3
chr1	96150872	2.20435e-06	0.000392937			Intergenic							30	14	16	77	34	43	16	16	0	86	28	58	28	13	15	62	30	32	83	43	40	73	71	2	16	8	8
chr1	96305418	9.3822e-05	0.00933892			Intergenic							14	2	12	131	10	121	49	9	40	69	5	64	43	9	34	102	22	80	96	23	73	90	19	71	20	6	14
chr1	97125439	7.23405e-07	0.000146381			Intergenic							15	5	10	71	55	16	17	10	7	47	39	8	36	15	21	52	14	38	66	48	18	68	16	52	13	5	8
chr1	97125440	8.03643e-13	4.34304e-10			Intergenic							14	9	5	66	52	14	28	22	6	55	41	14	39	17	22	52	17	35	77	54	23	77	14	63	17	5	12
chr1	97390874	2.48133e-05	0.003156			Intergenic							11	7	4	107	96	11	48	38	10	65	43	22	59	33	26	45	27	18	87	58	29	47	30	17	13	7	6
chr1	98377271	8.12293e-08	2.011e-05			Intergenic							14	14	0	104	97	7	27	27	0	75	72	3	41	38	3	46	36	10	59	53	6	75	49	26	14	13	1
chr1	100004114	1.2187e-08	3.5283e-06			Intergenic							10	8	2	106	54	52	10	9	1	61	51	10	35	23	12	23	15	8	55	54	1	50	43	7	15	13	2
chr1	101231407	4.62713e-05	0.00528736			Intergenic							16	0	16	71	1	70	34	19	15	75	8	67	51	1	50	68	14	54	95	22	73	66	24	42	18	4	14
chr1	103930649	3.35092e-05	0.0040324			Intergenic							11	7	4	97	60	37	29	16	13	65	41	24	43	24	19	53	14	39	77	23	54	63	33	30	15	5	10
chr1	104963736	3.19137e-06	0.000545508			Intergenic							17	10	7	45	45	0	31	28	3	49	46	3	32	19	13	51	51	0	106	61	45	55	28	27	23	22	1
chr1	106409075	1.45279e-10	5.73028e-08			Intergenic			106408870	106409151			19	13	6	176	167	9	80	55	25	111	89	22	66	60	6	181	96	85	175	124	51	139	92	47	23	15	8
chr1	107532392	4.08707e-08	1.07019e-05			Intergenic							14	13	1	79	77	2	20	20	0	64	63	1	47	23	24	26	25	1	66	41	25	35	18	17	26	26	0
chr1	107707756	5.75658e-05	0.00632467			Intergenic							15	12	3	48	47	1	14	7	7	38	32	6	46	36	10	29	9	20	61	30	31	45	38	7	15	8	7
chr1	107878451	2.2207e-28	5.68445e-25			Intergenic							27	0	27	100	2	98	87	0	87	125	0	125	41	23	18	145	0	145	127	72	55	97	43	54	33	0	33
chr1	108245098	8.33021e-08	2.05791e-05			Intergenic							13	5	8	56	36	20	22	15	7	59	53	6	35	18	17	53	49	4	96	94	2	65	64	1	17	7	10
chr1	108469612	8.7381e-07	0.000173016			Intergenic							22	22	0	76	71	5	29	28	1	81	80	1	43	41	2	65	57	8	89	77	12	34	31	3	15	6	9
chr1	108515252	6.023e-05	0.00656348			Intergenic			108514583	108515849			19	9	10	134	120	14	64	42	22	95	77	18	55	33	22	114	58	56	127	72	55	96	68	28	27	20	7
chr1	109209309	4.13267e-09	1.29469e-06			Intergenic							16	0	16	69	68	1	54	29	25	76	25	51	40	23	17	81	1	80	84	41	43	50	24	26	18	0	18
chr1	109580593	6.81248e-07	0.00013873			Intergenic							12	3	9	59	46	13	46	32	14	55	25	30	23	10	13	52	0	52	76	37	39	74	35	39	20	1	19
chr1	111876067	1.10998e-07	2.67297e-05			Intergenic							14	0	14	40	38	2	22	9	13	36	0	36	38	19	19	44	9	35	10	8	2	30	0	30	14	1	13
chr1	115055921	4.26315e-05	0.00494134			Intergenic			115055206	115056930			20	3	17	74	1	73	34	0	34	32	0	32	23	0	23	82	0	82	57	0	57	44	0	44	11	0	11
chr1	116301359	2.97353e-13	1.69688e-10			Intergenic							12	12	0	91	85	6	21	19	2	78	66	12	46	44	2	57	53	4	92	42	50	71	43	28	14	13	1
chr1	116301373	1.56383e-14	1.03482e-11			Intergenic							12	12	0	91	88	3	21	19	2	78	64	14	46	43	3	56	52	4	91	39	52	72	45	27	14	13	1
chr1	116357021	2.16422e-10	8.27917e-08			Intergenic							21	19	2	85	38	47	16	15	1	77	71	6	39	20	19	58	54	4	95	91	4	76	64	12	18	18	0
chr1	119712237	8.48236e-17	7.1883e-14			Intergenic							24	23	1	72	71	1	14	14	0	75	64	11	39	36	3	31	27	4	58	25	33	50	22	28	19	17	2
chr1	122165339	1.61119e-05	0.00218868			Intergenic			122164900	122165463			21	19	2	85	79	6	10	6	4	80	71	9	39	31	8	50	37	13	97	62	35	53	45	8	19	12	7
chr1	127886294	8.84914e-05	0.00890457			Intergenic							11	1	10	88	6	82	37	8	29	60	5	55	40	4	36	67	18	49	86	23	63	75	21	54	18	2	16
chr1	129370312	2.10199e-06	0.00037696			Intergenic							21	10	11	92	89	3	25	12	13	66	26	40	25	12	13	81	76	5	112	109	3	69	60	9	19	18	1
chr1	129502743	2.29165e-05	0.00295492			Intergenic							13	10	3	46	28	18	11	10	1	38	38	0	42	39	3	30	27	3	57	49	8	30	30	0	12	12	0
chr1	129829078	7.56013e-05	0.00786514			Intergenic					129828826	129830825	10	2	8	69	0	69	40	0	40	68	0	68	28	0	28	94	0	94	72	0	72	52	0	52	19	0	19
chr1	131043564	3.97261e-05	0.00466026			Intergenic							10	7	3	28	26	2	38	26	12	32	24	8	22	14	8	78	49	29	91	57	34	84	36	48	19	13	6
chr1	131066087	4.74043e-06	0.000767178			Intergenic			131066062	131066878			12	0	12	69	0	69	55	0	55	71	0	71	47	0	47	64	0	64	94	0	94	48	0	48	16	3	13
chr1	131074720	2.33439e-05	0.00300039			Intergenic							15	2	13	80	24	56	56	36	20	137	45	92	63	31	32	99	50	49	160	94	66	132	77	55	35	12	23
chr1	134018989	9.8934e-06	0.00144743			Intergenic					134018950	134020949	14	3	11	141	52	89	74	16	58	118	21	97	55	13	42	135	22	113	138	20	118	105	14	91	35	7	28
chr1	134370896	4.48852e-05	0.00515764			Intergenic							15	6	9	81	37	44	32	11	21	30	15	15	56	24	32	54	26	28	85	51	34	139	93	46	10	6	4
chr1	135000806	1.58016e-12	8.25614e-10			Intergenic							18	7	11	74	66	8	61	17	44	75	38	37	32	15	17	91	82	9	121	107	14	72	63	9	23	22	1
chr1	135000807	8.94385e-08	2.19718e-05			Intergenic							16	6	10	53	46	7	38	12	26	43	23	20	34	17	17	56	46	10	74	66	8	67	58	9	19	17	2
chr1	138965964	2.05367e-06	0.000369091			Intergenic							20	8	12	78	77	1	20	14	6	73	34	39	33	20	13	62	59	3	75	72	3	62	58	4	27	26	1
chr1	139715394	8.85538e-16	6.75029e-13			Intergenic							13	9	4	54	7	47	18	1	17	45	3	42	37	3	34	70	37	33	84	45	39	96	52	44	30	26	4
chr1	139715429	2.53818e-53	7.17638e-49			Intergenic							12	4	8	48	1	47	10	0	10	69	0	69	30	0	30	37	21	16	65	38	27	70	68	2	20	20	0
chr1	139804966	8.81448e-05	0.00887974			Promoter	139803458	139805458	139804149	139805547			12	2	10	82	0	82	61	0	61	81	0	81	53	0	53	79	0	79	69	0	69	60	0	60	17	0	17
chr1	142452144	3.30849e-05	0.00399021			Intergenic							25	5	20	104	5	99	42	1	41	72	1	71	51	3	48	84	1	83	85	0	85	61	0	61	23	0	23
chr1	144889332	8.15661e-35	3.84363e-31			Intergenic							18	3	15	72	0	72	31	0	31	52	0	52	28	9	19	97	52	45	108	54	54	99	62	37	12	9	3
chr1	144889333	7.41785e-29	1.98882e-25			Intergenic							23	8	15	99	1	98	43	0	43	82	0	82	46	14	32	76	37	39	120	55	65	69	47	22	29	10	19
chr1	145865072	4.35172e-11	1.85211e-08			Intergenic							13	8	5	20	2	18	21	0	21	59	1	58	29	12	17	77	66	11	80	64	16	63	36	27	15	0	15
chr1	146681064	5.8728e-12	2.83069e-09			Intergenic							25	0	25	97	24	73	57	0	57	76	19	57	41	0	41	90	0	90	121	0	121	68	0	68	35	0	35
chr1	146707891	1.06643e-06	0.000206199			Intergenic							25	19	6	171	122	49	71	69	2	134	94	40	73	42	31	89	76	13	119	111	8	108	97	11	31	30	1
chr1	148281881	2.0502e-05	0.00269242			Intergenic							16	14	2	59	47	12	23	16	7	59	50	9	33	25	8	47	25	22	78	43	35	63	37	26	10	7	3
chr1	148281931	9.23467e-07	0.000181662			Intergenic							16	14	2	59	53	6	23	18	5	60	49	11	33	28	5	47	36	11	78	45	33	63	37	26	10	8	2
chr1	148908723	9.04556e-06	0.00134349			Intergenic					148907365	148908868	14	10	4	116	73	43	17	13	4	88	59	29	32	16	16	43	34	9	76	70	6	48	44	4	15	10	5
chr1	149303954	6.07014e-21	8.335e-18			Intergenic							27	27	0	32	29	3	49	47	2	60	56	4	31	29	2	109	105	4	124	73	51	101	47	54	14	14	0
chr1	156187225	3.82279e-08	1.00565e-05			Intergenic							16	0	16	81	36	45	19	1	18	63	0	63	41	11	30	48	14	34	81	2	79	40	0	40	18	0	18
chr1	158164764	7.28424e-05	0.00764137			Intergenic							12	8	4	39	30	9	17	11	6	42	28	14	29	17	12	28	24	4	34	34	0	42	41	1	10	8	2
chr1	158807839	8.42126e-05	0.00855497			Intergenic							11	10	1	102	100	2	28	25	3	58	55	3	42	38	4	42	38	4	74	64	10	77	61	16	11	10	1
chr1	158827946	1.44118e-07	3.3841e-05			Intergenic							12	1	11	94	31	63	55	15	40	92	13	79	46	7	39	50	5	45	57	0	57	49	6	43	24	1	23
chr1	159659551	9.99707e-05	0.00981903			Intergenic							11	11	0	85	84	1	12	12	0	62	61	1	20	18	2	44	42	2	88	70	18	62	56	6	15	15	0
chr1	159659610	4.91205e-10	1.77485e-07			Intergenic							11	0	11	85	39	46	12	0	12	62	0	62	20	19	1	44	14	30	88	1	87	62	1	61	15	0	15
chr1	159989487	4.31991e-10	1.57622e-07			Intergenic							15	14	1	45	42	3	13	12	1	50	44	6	30	26	4	55	49	6	57	35	22	50	24	26	11	8	3
chr1	162689711	5.90235e-14	3.67139e-11			Intergenic							15	13	2	132	47	85	28	13	15	78	72	6	49	25	24	64	29	35	64	58	6	75	70	5	11	9	2
chr1	162985053	7.72286e-09	2.31619e-06			Intergenic							21	20	1	93	46	47	31	10	21	65	58	7	45	24	21	71	33	38	117	111	6	41	36	5	18	18	0
chr1	162985080	1.47974e-06	0.000276199			Intergenic							21	19	2	93	43	50	31	10	21	65	54	11	45	25	20	71	32	39	117	103	14	41	34	7	18	15	3
chr1	163407476	1.25302e-13	7.49069e-11			Intergenic							14	12	2	117	58	59	28	9	19	90	82	8	24	14	10	57	27	30	81	80	1	70	66	4	11	11	0
chr1	163511729	1.68132e-05	0.00226858			Intergenic							21	18	3	28	26	2	16	16	0	78	71	7	20	19	1	27	27	0	133	104	29	125	88	37	25	21	4
chr1	163901704	7.71927e-05	0.00799746			Intergenic							14	5	9	118	72	46	50	32	18	91	65	26	66	49	17	75	42	33	75	55	20	81	70	11	18	15	3
chr1	163943780	5.5264e-08	1.41404e-05			Intergenic							15	0	15	93	38	55	24	7	17	53	2	51	46	18	28	41	13	28	67	0	67	45	1	44	12	0	12
chr1	164135129	5.92918e-09	1.81277e-06			Intergenic							19	0	19	111	49	62	31	16	15	86	0	86	37	19	18	94	43	51	95	3	92	58	0	58	27	0	27
chr1	164142914	5.37345e-15	3.74079e-12			Intergenic							17	0	17	142	67	75	41	24	17	59	0	59	41	20	21	78	33	45	100	0	100	73	3	70	17	0	17
chr1	164421958	4.98569e-10	1.79884e-07	NM_001143716	MAP2K1	Intron	164420656	164422472					17	17	0	76	31	45	42	14	28	70	69	1	37	19	18	63	30	33	65	61	4	68	62	6	22	21	1
chr1	164636579	4.27423e-05	0.00495187			Intergenic							24	20	4	88	69	19	39	29	10	127	94	33	38	25	13	87	59	28	108	74	34	94	49	45	26	16	10
chr1	164862276	1.74326e-09	5.79245e-07			Intergenic							27	15	12	67	36	31	55	51	4	66	33	33	50	41	9	99	92	7	129	73	56	63	2	61	26	0	26
chr1	165749989	9.7544e-05	0.00963508			Intergenic					165748952	165750951	12	0	12	71	0	71	49	0	49	77	0	77	34	1	33	78	0	78	78	2	76	43	6	37	12	0	12
chr1	165751448	7.99079e-06	0.00120539			Intergenic					165751438	165751701	17	3	14	70	0	70	38	0	38	53	0	53	35	0	35	64	0	64	79	0	79	54	0	54	21	0	21
chr1	165754974	1.38873e-05	0.00193183			Intergenic			165753169	165758120			19	2	17	148	17	131	48	1	47	63	3	60	70	1	69	102	0	102	92	1	91	89	3	86	13	0	13
chr1	166199014	5.20363e-06	0.000832181			Intergenic							26	18	8	94	56	38	24	14	10	88	38	50	42	20	22	36	4	32	78	32	46	81	31	50	16	4	12
chr1	166251177	4.86208e-06	0.000784518			Intergenic							13	3	10	69	37	32	21	20	1	50	22	28	37	37	0	21	21	0	39	0	39	45	11	34	10	0	10
chr1	166597042	7.35093e-06	0.00112262			Intergenic							21	19	2	105	102	3	35	33	2	110	93	17	31	29	2	87	79	8	97	92	5	76	40	36	29	29	0
chr1	166597043	8.52e-06	0.0012761			Intergenic							19	17	2	106	95	11	50	50	0	118	103	15	36	35	1	123	117	6	112	108	4	105	56	49	32	31	1
chr1	166602028	1.18399e-09	4.04876e-07			Intergenic							10	9	1	125	113	12	48	43	5	70	62	8	48	44	4	111	92	19	125	112	13	87	33	54	22	21	1
chr1	166602075	2.8643e-07	6.32353e-05			Intergenic							10	10	0	125	63	62	48	21	27	70	64	6	48	21	27	111	54	57	125	107	18	87	69	18	22	21	1
chr1	166609793	3.40094e-21	4.75383e-18			Intergenic							13	6	7	88	47	41	29	0	29	57	21	36	36	0	36	51	29	22	64	61	3	77	73	4	16	16	0
chr1	167220483	1.94639e-06	0.000352048			Intergenic							17	13	4	101	93	8	17	9	8	62	57	5	44	28	16	60	37	23	84	57	27	88	57	31	12	8	4
chr1	167821356	1.15459e-05	0.00165327			Intergenic			167821324	167821623			24	20	4	105	83	22	36	30	6	112	86	26	36	24	12	78	66	12	105	66	39	66	29	37	16	13	3
chr1	167853427	4.03379e-05	0.00471947			Intergenic					167851523	167853522	18	3	15	110	47	63	44	4	40	90	12	78	41	11	30	66	8	58	55	10	45	66	8	58	17	2	15
chr1	167853454	4.01291e-05	0.00469813			Intergenic					167851523	167853522	18	1	17	112	38	74	46	2	44	90	6	84	41	8	33	66	3	63	55	5	50	66	5	61	16	2	14
chr1	168000684	6.3247e-13	3.47382e-10			Intergenic							15	6	9	64	35	29	51	42	9	64	29	35	43	37	6	51	20	31	76	1	75	44	16	28	13	0	13
chr1	168212926	4.40255e-05	0.00507361			Intergenic							13	8	5	88	67	21	18	7	11	53	18	35	38	28	10	41	22	19	61	28	33	57	14	43	19	13	6
chr1	168882456	5.95612e-05	0.00650314			Intergenic							17	12	5	43	37	6	22	19	3	74	59	15	26	22	4	58	47	11	74	68	6	58	15	43	12	10	2
chr1	175191906	1.55165e-05	0.00212401			Intergenic							10	8	2	62	58	4	14	12	2	55	45	10	30	26	4	14	13	1	58	51	7	29	11	18	14	8	6
chr1	180061547	2.60048e-07	5.78732e-05			Intergenic							14	13	1	93	87	6	32	32	0	41	33	8	44	44	0	42	41	1	71	69	2	59	26	33	11	11	0
chr1	180952822	1.79974e-05	0.00240877			Intergenic							10	7	3	103	95	8	14	11	3	78	70	8	36	29	7	43	40	3	82	56	26	58	38	20	15	12	3
chr1	181407266	2.22865e-11	9.91962e-09			Intergenic							26	9	17	158	19	139	113	59	54	104	26	78	68	23	45	148	79	69	172	72	100	140	73	67	26	16	10
chr1	181882137	7.82074e-05	0.00807749			Intergenic							20	6	14	69	43	26	19	1	18	49	29	20	40	23	17	33	8	25	60	14	46	36	13	23	12	0	12
chr1	183862915	7.2547e-05	0.0076181	NM_001244461	GMFB	Intron	183858518	183863254	183862759	183863505			18	1	17	102	11	91	42	1	41	65	1	64	65	1	64	63	0	63	99	3	96	101	0	101	20	0	20
chr1	189632520	2.12055e-05	0.00277281			Intergenic			189631970	189632975			15	0	15	86	9	77	45	1	44	84	0	84	50	0	50	71	1	70	75	0	75	91	0	91	13	0	13
chr1	194500153	6.90281e-09	2.08381e-06			Intergenic							22	11	11	71	17	54	32	30	2	88	28	60	37	1	36	71	55	16	69	49	20	61	44	17	15	9	6
chr1	205986654	5.72499e-12	2.7648e-09			Intergenic							25	22	3	84	39	45	26	9	17	74	68	6	40	22	18	79	37	42	98	96	2	70	69	1	21	20	1
chr1	208296794	2.16397e-06	0.000386689			Intergenic			208296767	208297040			13	3	10	124	42	82	35	7	28	74	39	35	66	11	55	70	13	57	92	18	74	108	13	95	13	1	12
chr1	212598626	1.00729e-12	5.38974e-10			Intergenic							15	15	0	68	30	38	13	12	1	67	60	7	20	18	2	59	58	1	53	52	1	51	46	5	17	17	0
chr1	212598675	5.27845e-11	2.2222e-08			Intergenic							15	15	0	68	32	36	13	13	0	67	58	9	20	20	0	59	54	5	53	52	1	51	48	3	17	16	1
chr1	214783454	2.27723e-06	0.000404711			Intergenic							16	6	10	115	36	79	33	10	23	36	0	36	64	18	46	33	2	31	57	0	57	46	6	40	15	3	12
chr1	215311871	4.8201e-08	1.24847e-05			Intergenic							11	11	0	83	83	0	12	7	5	69	40	29	32	30	2	32	31	1	60	29	31	33	16	17	11	11	0
chr1	216774432	1.1595e-05	0.00165934			Intergenic							15	14	1	59	57	2	41	36	5	48	40	8	29	26	3	66	64	2	68	36	32	67	61	6	10	3	7
chr1	218456192	7.55801e-07	0.000152119			Intergenic							22	20	2	127	87	40	37	35	2	80	70	10	37	35	2	94	87	7	110	102	8	66	59	7	18	18	0
chr1	218456256	8.74633e-11	3.57334e-08			Intergenic							22	22	0	127	89	38	37	35	2	80	77	3	37	35	2	94	90	4	110	106	4	66	66	0	18	17	1
chr1	222578177	4.69754e-05	0.00535159	NM_001206404	TJP2	Exon	222577761	222578340	222577819	222578307			21	0	21	73	22	51	38	1	37	52	35	17	41	0	41	94	0	94	70	19	51	98	0	98	13	3	10
chr1	223797676	1.60574e-05	0.00218318			Intergenic							12	0	12	94	4	90	23	3	20	48	0	48	34	0	34	41	2	39	59	8	51	53	12	41	17	4	13
chr1	225722661	1.66975e-05	0.00225615			Intergenic							15	15	0	89	40	49	26	12	14	71	64	7	53	19	34	59	30	29	83	41	42	71	31	40	26	0	26
chr1	230545269	8.51655e-07	0.000168925			Promoter	230544123	230546123	230544669	230546091			30	4	26	214	19	195	62	2	60	110	2	108	85	2	83	123	1	122	151	2	149	117	2	115	16	0	16
chr1	234041485	1.77931e-14	1.17119e-11			Intergenic							13	0	13	69	0	69	28	0	28	60	0	60	35	0	35	57	0	57	73	1	72	77	0	77	18	10	8
chr1	236678085	2.01413e-05	0.0026543			Intergenic							21	14	7	94	43	51	39	20	19	125	84	41	76	38	38	90	65	25	138	107	31	138	93	45	24	18	6
chr1	237558626	7.10254e-07	0.000144024			Intergenic							14	9	5	65	36	29	43	25	18	59	18	41	34	12	22	76	45	31	70	23	47	83	12	71	12	4	8
chr1	238156783	1.01783e-06	0.000198094			Intergenic							18	18	0	118	114	4	47	43	4	80	74	6	32	17	15	47	36	11	99	91	8	59	40	19	13	10	3
chr1	238156935	3.02152e-06	0.000519832			Intergenic							10	0	10	72	1	71	46	2	44	54	5	49	39	14	25	84	12	72	65	4	61	101	27	74	18	4	14
chr1	238157016	2.10474e-06	0.000377344			Intergenic							13	10	3	140	71	69	51	45	6	98	51	47	65	25	40	85	71	14	83	64	19	97	78	19	18	13	5
chr1	238790538	7.42854e-06	0.00113322			Intergenic							14	5	9	56	0	56	27	15	12	50	25	25	46	19	27	41	41	0	40	38	2	69	25	44	11	0	11
chr1	239375678	8.32577e-05	0.00847873			Intergenic			239374932	239376108			17	4	13	76	10	66	26	5	21	45	1	44	24	0	24	60	3	57	48	0	48	39	1	38	17	1	16
chr1	239415725	5.44491e-05	0.00603154			Intergenic							24	23	1	75	68	7	26	23	3	64	62	2	32	16	16	55	31	24	91	83	8	54	29	25	16	16	0
chr1	239501032	3.64789e-15	2.60663e-12			Intergenic							14	14	0	130	127	3	28	26	2	64	62	2	37	14	23	47	22	25	58	55	3	70	32	38	12	12	0
chr1	239782006	5.2138e-05	0.005824	NM_001243624	TRMO	Intron	239779412	239786824					26	25	1	86	84	2	37	31	6	94	45	49	26	23	3	58	57	1	117	114	3	69	69	0	23	23	0
chr1	239841564	8.95277e-05	0.00898994			Intergenic			239841469	239844092			15	0	15	60	0	60	50	1	49	70	0	70	32	0	32	69	0	69	61	0	61	65	9	56	11	0	11
chr1	240016461	1.2528e-06	0.000238857			Intergenic							19	16	3	77	65	12	92	54	38	66	55	11	52	39	13	132	78	54	150	98	52	121	63	58	28	13	15
chr1	240199769	5.8204e-08	1.48074e-05			Intergenic							31	30	1	71	58	13	26	8	18	84	29	55	25	17	8	30	0	30	96	2	94	46	39	7	19	17	2
chr1	240362451	5.75819e-06	0.000909066			Intergenic							18	17	1	83	81	2	10	9	1	72	65	7	39	17	22	46	23	23	85	75	10	54	30	24	19	19	0
chr1	247100344	6.31583e-06	0.000984484			Intergenic							20	18	2	110	99	11	25	19	6	74	71	3	42	40	2	65	59	6	93	85	8	69	33	36	17	15	2
chr1	248096549	1.33858e-07	3.16648e-05			Intergenic					248096057	248097461	12	3	9	100	18	82	24	15	9	54	6	48	43	15	28	46	23	23	94	36	58	66	41	25	13	5	8
chr1	248177138	3.98489e-07	8.52955e-05			Intergenic							35	24	11	217	95	122	95	62	33	133	75	58	76	35	41	158	102	56	174	126	48	184	112	72	54	46	8
chr1	248589260	3.47324e-05	0.00415827			Intergenic			248589087	248589618			31	6	25	136	18	118	68	6	62	77	2	75	58	2	56	143	12	131	142	3	139	109	1	108	28	3	25
chr1	248589575	2.79766e-08	7.54642e-06			Intergenic			248589087	248589618			14	0	14	76	3	73	38	2	36	63	8	55	55	3	52	61	6	55	95	13	82	75	30	45	11	0	11
chr1	249103178	0.000100257	0.00984017			Intergenic			249103101	249103587			14	8	6	121	71	50	21	8	13	101	54	47	69	34	35	78	34	44	107	39	68	65	27	38	25	7	18
chr1	250354471	3.11537e-11	1.35229e-08			Intergenic							24	21	3	134	101	33	52	45	7	63	36	27	43	17	26	72	38	34	71	29	42	64	26	38	15	11	4
chr1	252749635	3.19373e-10	1.18814e-07			Intergenic							15	1	14	106	5	101	47	1	46	107	22	85	60	14	46	60	6	54	119	4	115	160	67	93	32	8	24
chr1	253036803	1.29142e-15	9.70743e-13	NM_001077215	PTBP3	Intron	253034302	253038526					11	11	0	85	84	1	14	14	0	75	32	43	40	22	18	60	58	2	113	110	3	89	0	89	18	12	6
chr1	253552032	1.06834e-06	0.000206471			Intergenic					253550328	253552327	17	10	7	108	76	32	44	26	18	81	51	30	76	39	37	78	44	34	135	60	75	131	56	75	16	7	9
chr1	253705500	6.27851e-14	3.89175e-11			Intergenic							16	15	1	35	27	8	36	31	5	27	9	18	40	18	22	46	40	6	67	32	35	45	0	45	19	6	13
chr1	254208178	1.46217e-05	0.00201864			Intergenic			254208151	254208371			10	1	9	129	1	128	36	0	36	74	35	39	35	9	26	55	0	55	81	0	81	60	22	38	12	9	3
chr1	254224450	7.56882e-18	7.30483e-15			Intergenic							35	29	6	106	95	11	53	46	7	111	106	5	55	47	8	130	111	19	120	111	9	84	2	82	26	25	1
chr1	254227534	5.77893e-13	3.18531e-10			Intergenic							28	0	28	131	7	124	39	2	37	92	39	53	49	19	30	80	0	80	120	3	117	56	55	1	12	6	6
chr1	254618193	1.0663e-09	3.66544e-07			Intergenic							39	12	27	148	79	69	62	17	45	68	6	62	60	22	38	112	40	72	102	17	85	82	9	73	23	3	20
chr1	254711877	0.000101807	0.00995437			Intergenic							23	9	14	151	94	57	57	34	23	145	66	79	55	24	31	96	46	50	169	87	82	53	6	47	24	10	14
chr1	254847088	1.7724e-27	4.27314e-24			Intergenic							14	0	14	67	1	66	26	0	26	60	0	60	51	0	51	47	2	45	94	3	91	58	47	11	12	0	12
chr1	254909218	1.48393e-09	4.98401e-07			Intergenic							13	12	1	89	82	7	16	16	0	41	32	9	39	35	4	38	37	1	48	46	2	38	2	36	11	11	0
chr1	254910887	1.19377e-06	0.000228407			Intergenic							27	8	19	142	33	109	40	11	29	104	21	83	60	27	33	84	19	65	136	41	95	49	45	4	22	7	15
chr1	254921026	1.0139e-09	3.49304e-07			Intergenic							20	20	0	83	82	1	18	18	0	59	58	1	43	41	2	60	58	2	56	56	0	81	57	24	15	14	1
chr1	254921027	2.53397e-08	6.8859e-06			Intergenic							17	2	15	73	5	68	40	7	33	65	2	63	35	1	34	65	7	58	83	12	71	109	44	65	14	2	12
chr1	254921041	4.95221e-29	1.34514e-25			Intergenic							20	0	20	83	2	81	19	0	19	59	0	59	43	0	43	60	0	60	56	0	56	58	52	6	15	0	15
chr1	254921042	5.94234e-42	5.55829e-38			Intergenic							17	0	17	74	1	73	40	0	40	65	0	65	35	0	35	65	0	65	83	0	83	74	68	6	14	0	14
chr1	254945133	4.99204e-15	3.4909e-12			Intergenic					254943257	254945256	11	0	11	63	2	61	16	0	16	67	4	63	43	1	42	25	3	22	25	1	24	105	46	59	11	1	10
chr1	255510488	5.38864e-07	0.000112252			Intergenic							18	4	14	105	11	94	41	38	3	74	7	67	46	3	43	80	55	25	88	34	54	86	40	46	19	9	10
chr1	260460224	3.17892e-05	0.00386731			Intergenic							14	3	11	133	18	115	38	2	36	71	8	63	51	0	51	68	1	67	75	2	73	62	3	59	13	0	13
chr1	261114215	4.85153e-10	1.75557e-07			Intergenic							16	0	16	98	0	98	60	10	50	74	0	74	34	1	33	69	2	67	170	34	136	101	16	85	22	9	13
chr1	261334776	9.14384e-05	0.00914048			Intergenic							18	15	3	79	58	21	49	32	17	85	71	14	46	31	15	63	48	15	104	67	37	96	50	46	20	10	10
chr1	261835356	4.88705e-05	0.005527			Intergenic			261835040	261835555			12	6	6	109	12	97	39	36	3	122	15	107	42	5	37	90	59	31	93	29	64	61	28	33	16	7	9
chr1	261851463	5.99656e-07	0.000123632			Intergenic							19	13	6	136	120	16	45	22	23	87	69	18	62	46	16	82	49	33	154	100	54	148	83	65	19	13	6
chr1	261898935	4.95385e-05	0.00559137			Intergenic							25	19	6	97	30	67	55	35	20	110	48	62	64	27	37	100	63	37	138	83	55	124	74	50	20	18	2
chr1	264325553	6.44815e-05	0.00693206			Intergenic							17	13	4	83	68	15	77	64	13	96	81	15	59	46	13	116	74	42	145	96	49	124	81	43	22	18	4
chr1	264325554	8.96324e-06	0.00133301			Intergenic							18	7	11	79	9	70	59	30	29	107	19	88	43	8	35	130	51	79	143	64	79	133	64	69	26	5	21
chr1	265275034	7.64829e-06	0.00116077			Intergenic							18	9	9	100	15	85	59	41	18	78	34	44	44	2	42	90	65	25	102	54	48	56	29	27	15	8	7
chr1	266092009	2.28444e-05	0.00294777			Intergenic							13	2	11	69	6	63	42	2	40	77	3	74	36	4	32	81	6	75	67	7	60	84	32	52	18	0	18
chr1	267283564	5.53433e-05	0.00611451	NM_001258424	LMX1B	Exon	267283457	267283638					27	7	20	149	43	106	17	8	9	116	31	85	63	23	40	49	22	27	97	37	60	95	44	51	20	14	6
chr1	267913418	1.53204e-05	0.00210042			Intergenic							30	9	21	117	20	97	20	4	16	142	28	114	79	33	46	72	20	52	158	52	106	94	44	50	41	13	28
chr1	267942077	8.183e-05	0.00836512			Intergenic			267941737	267942184			11	1	10	59	4	55	38	0	38	48	0	48	40	0	40	69	0	69	69	0	69	56	0	56	11	0	11
chr1	268008416	2.09874e-05	0.00274834			Intergenic			268007991	268008458			15	5	10	127	80	47	16	5	11	68	42	26	52	36	16	48	4	44	110	33	77	91	46	45	23	7	16
chr1	268248932	3.94213e-06	0.000653456			Intergenic					268248879	268250878	14	5	9	106	19	87	23	17	6	98	14	84	37	3	34	66	45	21	50	18	32	68	35	33	12	3	9
chr1	268593547	8.57405e-05	0.00867617			Intergenic					268592166	268594165	17	2	15	132	10	122	54	43	11	82	10	72	39	3	36	64	26	38	80	32	48	82	28	54	10	4	6
chr1	268630836	4.50318e-06	0.000734131			Intergenic							19	8	11	102	100	2	11	10	1	97	44	53	42	20	22	42	38	4	94	93	1	55	55	0	16	16	0
chr1	268777208	4.19207e-06	0.0006891			Intergenic			268777182	268777749			19	7	12	75	71	4	23	23	0	84	36	48	44	19	25	58	57	1	73	71	2	67	60	7	18	18	0
chr1	268805934	6.25664e-05	0.00677241	NM_001243487	URM1	Intron	268802981	268811703					28	15	13	96	82	14	45	25	20	87	65	22	80	45	35	82	52	30	93	54	39	129	66	63	14	9	5
chr1	269065682	1.69006e-05	0.00227939			Intergenic							10	2	8	65	48	17	11	11	0	43	18	25	31	15	16	43	38	5	62	60	2	65	51	14	12	11	1
chr1	269104694	7.1303e-06	0.00109336	NM_001244486	ZER1	Intron	269104460	269104778			269103408	269104796	19	4	15	83	40	43	31	1	30	107	55	52	43	14	29	78	21	57	114	19	95	126	26	100	19	5	14
chr1	269140276	6.88102e-07	0.000139942			Intergenic					269140172	269142171	15	14	1	93	70	23	32	24	8	21	20	1	70	41	29	56	28	28	87	41	46	38	20	18	15	10	5
chr1	269146375	2.2113e-07	4.99629e-05			Intergenic			269145906	269146386			24	24	0	16	16	0	36	31	5	88	38	50	33	31	2	88	86	2	84	82	2	61	60	1	17	17	0
chr1	269231093	1.11824e-11	5.21223e-09			Intergenic					269231041	269233040	14	8	6	87	83	4	25	24	1	68	0	68	36	32	4	43	43	0	65	64	1	83	0	83	13	5	8
chr1	269332122	4.70086e-05	0.00535426			Intergenic			269331856	269332595			28	2	26	131	17	114	65	3	62	94	9	85	52	1	51	113	8	105	122	3	119	102	1	101	30	0	30
chr1	269340718	1.28371e-05	0.00180839			Intergenic					269339575	269342000	19	1	18	76	13	63	74	17	57	83	10	73	57	8	49	112	30	82	113	40	73	124	44	80	32	7	25
chr1	269340719	5.04425e-05	0.00567435			Intergenic					269339575	269342000	17	12	5	38	31	7	46	26	20	59	46	13	41	28	13	75	47	28	99	55	44	96	41	55	16	11	5
chr1	269361339	2.43925e-13	1.40618e-10			Intergenic					269360106	269362751	20	7	13	175	90	85	49	5	44	107	23	84	80	29	51	97	12	85	143	19	124	109	22	87	31	3	28
chr1	269361594	4.48873e-05	0.00515764			Intergenic					269360106	269362751	15	1	14	80	7	73	18	14	4	65	6	59	39	5	34	33	16	17	48	14	34	38	20	18	13	1	12
chr1	269362219	4.06043e-06	0.000670495			Intergenic					269360106	269362751	14	8	6	141	68	73	18	16	2	71	44	27	62	34	28	55	26	29	95	70	25	54	49	5	10	7	3
chr1	269378357	1.8138e-07	4.1817e-05			Intergenic							23	0	23	95	93	2	11	11	0	147	71	76	55	21	34	23	10	13	93	90	3	77	2	75	39	15	24
chr1	269381370	3.6134e-05	0.00430083			Intergenic							34	11	23	117	24	93	96	40	56	164	50	114	61	27	34	123	37	86	183	81	102	176	78	98	41	20	21
chr1	269381371	5.67294e-05	0.00624602			Intergenic							20	12	8	80	62	18	62	30	32	88	59	29	46	21	25	85	47	38	126	51	75	124	62	62	14	8	6
chr1	269381445	1.51773e-07	3.55245e-05			Intergenic							20	8	12	92	71	21	54	9	45	74	29	45	74	43	31	41	5	36	125	43	82	114	33	81	28	9	19
chr1	269387399	4.20247e-07	8.95215e-05			Intergenic					269385974	269387973	16	1	15	55	35	20	31	18	13	79	40	39	53	35	18	38	11	27	110	26	84	127	36	91	17	5	12
chr1	269710734	8.6779e-05	0.00876629			Intergenic					269708753	269710752	33	9	24	103	41	62	75	22	53	111	63	48	43	10	33	96	30	66	123	20	103	116	33	83	22	2	20
chr1	269710760	9.93097e-06	0.00145143			Intergenic			269710753	269711833			33	9	24	103	31	72	75	16	59	111	53	58	43	7	36	96	17	79	123	12	111	116	21	95	22	3	19
chr1	269710763	9.95266e-05	0.00978545			Intergenic			269710753	269711833			33	9	24	103	44	59	75	19	56	111	61	50	43	11	32	96	30	66	123	18	105	116	31	85	22	5	17
chr1	269828082	1.16072e-09	3.97572e-07	NM_001243457	NTMT1	Exon	269827907	269828832	269827842	269828406			15	14	1	91	89	2	46	43	3	98	95	3	28	28	0	68	66	2	97	39	58	72	70	2	14	14	0
chr1	269837512	4.32871e-06	0.000708286			Intergenic							12	0	12	99	0	99	11	0	11	51	0	51	42	0	42	45	23	22	65	23	42	70	0	70	12	0	12
chr1	269860123	1.5143e-13	8.9452e-11			Intergenic							15	2	13	25	1	24	41	1	40	50	49	1	11	0	11	63	0	63	85	57	28	60	58	2	16	6	10
chr1	270190654	1.88011e-05	0.00250153			Intergenic			270190175	270190671			16	0	16	42	0	42	35	0	35	42	0	42	18	0	18	66	0	66	80	0	80	53	0	53	19	3	16
chr1	270263301	4.47935e-05	0.00514924			Intergenic							28	0	28	66	0	66	58	0	58	23	3	20	21	0	21	96	0	96	66	26	40	59	0	59	16	0	16
chr1	270290854	2.36719e-05	0.00303502			Intergenic							16	6	10	94	25	69	41	28	13	47	17	30	40	5	35	56	37	19	36	15	21	56	41	15	10	4	6
chr1	270466101	2.60116e-08	7.04695e-06			Intergenic							19	6	13	111	24	87	36	27	9	82	27	55	67	27	40	79	46	33	128	62	66	105	64	41	30	18	12
chr1	270500658	3.83393e-05	0.00452006			Intergenic							15	14	1	89	88	1	62	61	1	89	81	8	35	34	1	91	84	7	76	71	5	64	48	16	17	16	1
chr1	270520619	1.2091e-05	0.00172083			Intergenic					270520370	270522369	12	3	9	102	36	66	11	8	3	47	12	35	60	30	30	35	29	6	55	24	31	72	50	22	11	4	7
chr1	270574232	9.09978e-07	0.000179235			Intergenic					270572897	270574896	12	4	8	53	0	53	37	23	14	36	1	35	32	0	32	87	56	31	63	31	32	55	20	35	16	8	8
chr1	270600787	5.83486e-05	0.00639826			Intergenic							27	8	19	102	27	75	63	11	52	105	33	72	75	27	48	101	31	70	176	67	109	156	64	92	27	16	11
chr1	270667811	2.36544e-07	5.31463e-05	NM_001244285	FUBP3	Intron	270664596	270675177					25	14	11	141	114	27	74	29	45	119	76	43	67	39	28	150	80	70	134	68	66	110	43	67	17	10	7
chr1	270703792	4.29659e-06	0.000703494			Intergenic					270703483	270705482	10	5	5	52	37	15	37	15	22	95	50	45	48	21	27	70	22	48	113	39	74	82	28	54	12	4	8
chr1	270917975	1.13531e-05	0.00163129			Intergenic							11	1	10	47	8	39	21	16	5	63	0	63	26	0	26	56	46	10	59	50	9	47	0	47	11	6	5
chr1	271060598	2.10761e-10	8.08496e-08			Intergenic							13	0	13	122	7	115	17	14	3	83	14	69	47	2	45	54	25	29	86	39	47	59	28	31	22	2	20
chr1	271131945	1.92685e-10	7.43742e-08			Intergenic			271131792	271132030			13	6	7	60	12	48	25	20	5	40	14	26	17	5	12	58	42	16	72	50	22	52	42	10	19	12	7
chr1	271181450	5.10293e-06	0.00081892			Intergenic			271180563	271182055			37	21	16	203	109	94	87	40	47	180	66	114	63	16	47	181	64	117	192	61	131	141	49	92	51	21	30
chr1	271256211	4.79144e-09	1.48796e-06			Intergenic					271255212	271257211	19	8	11	103	14	89	30	19	11	92	20	72	39	3	36	47	31	16	91	40	51	61	40	21	19	7	12
chr1	271282647	7.60567e-05	0.0078993			Intergenic			271282288	271282788			10	0	10	97	0	97	22	10	12	56	36	20	30	0	30	60	0	60	72	0	72	69	0	69	11	0	11
chr1	271282648	1.46821e-06	0.000274581			Intergenic			271282288	271282788			12	0	12	104	2	102	33	20	13	85	40	45	41	0	41	82	2	80	77	2	75	95	0	95	11	1	10
chr1	271283892	8.09196e-10	2.8389e-07			Intergenic					271282789	271284788	29	0	29	107	0	107	59	33	26	108	44	64	30	0	30	118	0	118	104	0	104	90	0	90	27	0	27
chr1	271409619	2.11581e-05	0.00276778			Intergenic			271408923	271410200			12	11	1	72	70	2	34	30	4	34	33	1	17	16	1	39	33	6	55	41	14	33	25	8	14	11	3
chr1	271450485	7.84543e-05	0.0081003			Intergenic			271448464	271453916			13	0	13	70	3	67	23	9	14	77	32	45	20	0	20	49	0	49	61	1	60	53	0	53	11	0	11
chr1	271531346	5.22574e-05	0.00583472			Intergenic			271528760	271531443			18	0	18	163	79	84	53	52	1	105	99	6	43	0	43	102	101	1	107	52	55	79	2	77	21	8	13
chr1	271549783	8.11655e-08	2.01022e-05			Intergenic			271549451	271549840			11	6	5	71	60	11	22	15	7	43	36	7	45	29	16	48	32	16	71	39	32	56	23	33	16	7	9
chr1	271560749	3.15738e-08	8.43624e-06			Intergenic					271559766	271561765	39	35	4	130	55	75	35	0	35	85	0	85	45	45	0	81	0	81	103	57	46	99	98	1	17	10	7
chr1	271581668	1.0931e-05	0.00157903			Intergenic					271580241	271583261	10	1	9	106	10	96	30	21	9	97	17	80	37	0	37	42	17	25	66	26	40	54	21	33	10	4	6
chr1	271605634	3.2306e-05	0.00391715			Intergenic					271605549	271608955	14	14	0	89	76	13	18	17	1	70	62	8	35	28	7	29	23	6	69	49	20	58	40	18	18	12	6
chr1	271720769	7.86679e-06	0.00118943			Intergenic					271719030	271721029	17	13	4	93	58	35	26	21	5	74	58	16	30	21	9	55	48	7	86	64	22	75	73	2	13	12	1
chr1	271735802	1.18266e-05	0.00168685	NM_001001644	MED27	Intron	271727450	271741985	271735556	271737109			12	0	12	95	1	94	36	16	20	73	39	34	33	0	33	57	0	57	70	0	70	58	0	58	17	0	17
chr1	271736019	6.95412e-07	0.000141221	NM_001001644	MED27	Intron	271727450	271741985	271735556	271737109			14	14	0	96	93	3	24	21	3	98	36	62	48	44	4	93	92	1	117	116	1	81	80	1	24	23	1
chr1	271765445	2.16614e-05	0.00282175	NM_001001644	MED27	Intron	271751822	271796562					10	6	4	81	11	70	33	25	8	51	5	46	34	2	32	71	45	26	80	36	44	63	37	26	19	5	14
chr1	271765483	6.52423e-05	0.00700053	NM_001001644	MED27	Intron	271751822	271796562					30	30	0	101	101	0	58	56	2	63	60	3	25	22	3	120	112	8	120	108	12	51	44	7	29	27	2
chr1	271886394	9.42955e-06	0.00139072	NM_001001644	MED27	Intron	271862273	271925507			271884750	271888718	18	3	15	118	30	88	29	5	24	86	22	64	47	15	32	48	19	29	78	34	44	65	34	31	10	2	8
chr1	271917833	7.32972e-05	0.00768002	NM_001001644	MED27	Intron	271862273	271925507					10	2	8	72	12	60	40	7	33	80	13	67	54	17	37	78	19	59	84	27	57	65	31	34	11	1	10
chr1	272038561	1.43537e-08	4.09648e-06			Intergenic			272037917	272038793			10	1	9	117	50	67	45	3	42	60	17	43	60	16	44	78	6	72	89	6	83	76	11	65	17	2	15
chr1	272066776	2.41026e-05	0.00308199			Intergenic					272066180	272068179	14	7	7	103	0	103	53	47	6	81	72	9	39	1	38	83	72	11	71	41	30	88	32	56	19	16	3
chr1	272090774	2.03676e-07	4.63644e-05			Intergenic					272090565	272092564	29	26	3	98	95	3	41	22	19	84	42	42	65	57	8	111	1	110	85	46	39	87	84	3	31	10	21
chr1	272095854	2.34013e-13	1.3528e-10			Intergenic			272095806	272096519			18	7	11	120	3	117	11	11	0	84	77	7	33	0	33	43	42	1	90	42	48	64	36	28	17	16	1
chr1	272095941	1.66626e-07	3.87386e-05			Intergenic			272095806	272096519			38	20	18	134	57	77	52	33	19	102	60	42	67	33	34	106	91	15	123	93	30	126	78	48	27	20	7
chr1	272120619	4.65308e-05	0.00531067			Intergenic			272120490	272120850			11	4	7	76	1	75	12	12	0	33	33	0	37	0	37	19	18	1	59	21	38	35	12	23	11	11	0
chr1	272172032	5.10059e-06	0.000818755			Intergenic			272171907	272172208			10	3	7	54	5	49	36	7	29	58	9	49	24	0	24	66	24	42	76	22	54	58	31	27	25	5	20
chr1	272355067	8.50394e-08	2.0974e-05			Intergenic							12	4	8	89	1	88	30	28	2	59	57	2	31	0	31	48	45	3	73	29	44	67	39	28	12	11	1
chr1	272474456	2.12319e-05	0.00277481			Intergenic			272474089	272474840			16	0	16	65	38	27	41	40	1	47	46	1	24	0	24	100	97	3	76	39	37	40	4	36	21	0	21
chr1	272513609	3.85796e-06	0.000641211			Intergenic					272513223	272515222	27	22	5	146	97	49	35	13	22	112	76	36	71	37	34	63	32	31	106	47	59	107	48	59	19	10	9
chr1	272557143	7.86079e-05	0.00811145			Intergenic			272557072	272557427			23	12	11	125	9	116	64	18	46	100	14	86	40	0	40	93	34	59	99	29	70	84	28	56	19	7	12
chr1	272614044	7.29811e-06	0.0011162			Intergenic							18	16	2	97	89	8	40	40	0	68	64	4	56	43	13	88	82	6	105	88	17	108	81	27	18	12	6
chr1	272630833	2.66708e-07	5.91964e-05			Intergenic					272629212	272631211	10	6	4	64	53	11	17	8	9	50	38	12	36	27	9	59	24	35	83	47	36	77	36	41	11	2	9
chr1	272777667	7.63183e-06	0.00115912			Intergenic					272775915	272777914	13	7	6	152	40	112	35	31	4	69	25	44	56	7	49	77	62	15	77	33	44	93	58	35	15	6	9
chr1	272781504	7.1041e-05	0.00749411			Intergenic			272781371	272781717			47	29	18	167	88	79	96	72	24	194	103	91	91	53	38	159	122	37	183	135	48	130	86	44	25	19	6
chr1	272813519	6.30082e-05	0.00681193			Intergenic							16	7	9	74	70	4	30	28	2	51	29	22	34	33	1	66	34	32	55	50	5	53	24	29	11	6	5
chr1	272950358	8.77007e-07	0.000173538			Intergenic			272949767	272951275			10	1	9	86	44	42	17	0	17	29	12	17	56	20	36	49	5	44	49	6	43	30	5	25	11	1	10
chr1	273102459	7.78975e-05	0.0080515			Intergenic					273100487	273102486	13	8	5	116	78	38	17	9	8	73	63	10	31	18	13	70	58	12	66	51	15	54	48	6	17	17	0
chr1	273102486	5.70647e-06	0.000901949			Intergenic					273100487	273102486	13	5	8	145	48	97	25	9	16	117	68	49	33	11	22	107	43	64	101	53	48	54	41	13	23	15	8
chr1	273156629	3.90266e-05	0.00458892			Intergenic					273155371	273158160	17	16	1	66	54	12	41	35	6	41	33	8	29	19	10	89	69	20	78	53	25	82	48	34	20	14	6
chr1	273260274	1.81651e-11	8.22049e-09	NM_001253922	SARDH	Intron	273259387	273261123			273259407	273261406	17	8	9	154	144	10	22	2	20	83	59	24	39	32	7	51	20	31	94	57	37	78	32	46	16	10	6
chr1	273280134	0.000100656	0.00987153	NM_001253922	SARDH	Intron	273279673	273280836					15	12	3	61	53	8	40	14	26	75	50	25	40	34	6	73	69	4	71	61	10	76	66	10	12	11	1
chr1	273326125	5.05544e-08	1.30427e-05			Intergenic			273325567	273327110			14	4	10	137	66	71	20	18	2	68	32	36	55	25	30	62	49	13	85	62	23	89	69	20	13	8	5
chr1	273366129	8.71203e-05	0.00879504			Intergenic			273364871	273366351			20	9	11	95	10	85	24	19	5	67	14	53	46	1	45	50	31	19	80	38	42	75	24	51	14	9	5
chr1	273369305	1.11333e-05	0.00160311			Intergenic					273366352	273369638	20	16	4	139	106	33	10	5	5	96	79	17	42	31	11	43	25	18	70	42	28	64	31	33	17	11	6
chr1	273371786	4.90023e-05	0.00553889			Intergenic			273370574	273372217			12	8	4	161	122	39	22	17	5	123	65	58	78	31	47	40	19	21	118	61	57	94	55	39	29	14	15
chr1	273374969	1.11882e-06	0.000215424			Intergenic			273374225	273375297			18	16	2	110	84	26	15	9	6	75	57	18	36	18	18	31	15	16	51	31	20	50	23	27	13	6	7
chr1	273375062	1.42985e-08	4.08422e-06			Intergenic			273374225	273375297			23	16	7	155	91	64	28	11	17	123	69	54	73	22	51	70	23	47	103	32	71	100	28	72	17	12	5
chr1	273383601	3.67243e-06	0.000615888			Intergenic			273383105	273383743			40	3	37	127	10	117	25	17	8	126	13	113	35	2	33	84	35	49	119	29	90	78	25	53	31	7	24
chr1	273385988	1.48897e-07	3.48905e-05			Intergenic					273383744	273386382	14	6	8	73	27	46	62	41	21	65	30	35	44	17	27	86	61	25	88	62	26	75	57	18	21	14	7
chr1	273395246	1.25413e-06	0.000239074			Intergenic			273395082	273395432			16	5	11	90	10	80	23	18	5	89	9	80	53	4	49	45	32	13	74	21	53	53	24	29	17	10	7
chr1	273397079	2.73528e-06	0.000475427			Intergenic					273395433	273397854	14	0	14	46	1	45	24	5	19	55	1	54	39	5	34	42	3	39	45	8	37	69	21	48	11	2	9
chr1	273401214	6.00671e-07	0.000123785			Intergenic			273401117	273401412			26	10	16	114	13	101	17	14	3	93	17	76	45	3	42	49	35	14	78	33	45	77	33	44	30	12	18
chr1	273419761	1.43182e-09	4.81809e-07			Intergenic			273419531	273419994			12	1	11	120	15	105	29	26	3	64	7	57	32	3	29	49	39	10	69	28	41	69	39	30	13	3	10
chr1	273445897	1.82556e-05	0.00243992			Intergenic					273444902	273446901	11	4	7	111	9	102	66	42	24	95	18	77	37	1	36	99	54	45	77	29	48	83	30	53	14	9	5
chr1	273460892	4.03629e-05	0.0047215			Intergenic					273460228	273463806	10	1	9	93	9	84	22	13	9	67	7	60	48	4	44	57	25	32	64	15	49	44	19	25	10	3	7
chr1	273501795	6.43277e-05	0.0069215			Intergenic					273501068	273503067	27	22	5	93	68	25	59	49	10	93	61	32	55	44	11	77	67	10	111	102	9	77	66	11	17	17	0
chr1	273507401	3.53797e-05	0.0042248			Intergenic					273507020	273508669	37	28	9	173	81	92	68	60	8	160	103	57	88	55	33	102	93	9	130	93	37	82	60	22	23	16	7
chr1	273512060	3.28418e-05	0.00396666			Intergenic			273510746	273512198			15	11	4	81	57	24	21	17	4	72	69	3	38	31	7	68	59	9	64	53	11	67	66	1	11	11	0
chr1	273568350	2.68605e-07	5.95751e-05			Intergenic			273567544	273569759			14	6	8	148	0	148	34	16	18	95	30	65	36	0	36	57	18	39	58	0	58	85	48	37	13	0	13
chr1	273571544	7.7835e-06	0.00117841			Intergenic			273570669	273571622			28	9	19	104	100	4	71	38	33	151	58	93	42	40	2	120	113	7	124	121	3	91	47	44	38	38	0
chr1	273587622	7.99426e-05	0.00821374			Intergenic					273586971	273588970	24	23	1	92	85	7	33	29	4	107	88	19	49	38	11	58	39	19	106	82	24	74	54	20	11	10	1
chr1	273595707	2.86712e-08	7.71872e-06			Intergenic					273594259	273596493	13	5	8	81	8	73	20	0	20	61	1	60	47	17	30	63	29	34	84	27	57	75	28	47	14	6	8
chr1	273595878	5.74075e-06	0.000906427			Intergenic					273594259	273596493	13	11	2	83	80	3	80	32	48	61	52	9	26	26	0	104	49	55	81	44	37	91	51	40	18	13	5
chr1	273596534	2.32703e-05	0.00299249			Intergenic			273596494	273596804			23	11	12	59	46	13	39	8	31	71	33	38	45	41	4	70	50	20	79	62	17	48	37	11	23	18	5
chr1	273596539	9.49905e-05	0.00943265			Intergenic			273596494	273596804			24	13	11	60	41	19	39	9	30	73	20	53	45	42	3	71	50	21	82	61	21	47	29	18	22	17	5
chr1	273596546	7.61047e-07	0.000152977			Intergenic			273596494	273596804			24	11	13	60	40	20	39	8	31	73	21	52	45	35	10	71	46	25	82	64	18	47	32	15	23	18	5
chr1	273596584	7.51195e-09	2.25566e-06			Intergenic			273596494	273596804			24	10	14	61	36	25	39	5	34	73	16	57	45	35	10	71	44	27	83	62	21	47	30	17	23	19	4
chr1	273630288	2.26335e-05	0.0029251			Intergenic							17	5	12	114	80	34	33	13	20	98	32	66	52	26	26	79	30	49	104	36	68	73	23	50	16	8	8
chr1	273667527	7.71994e-05	0.00799746			Intergenic							11	3	8	91	51	40	11	3	8	70	30	40	59	21	38	18	10	8	46	13	33	65	13	52	11	4	7
chr1	273742906	2.50944e-07	5.60275e-05			Intergenic					273742055	273743151	11	3	8	113	9	104	18	15	3	76	8	68	41	5	36	29	16	13	51	19	32	72	32	40	10	2	8
chr1	273743692	2.62611e-06	0.000459364			Intergenic			273743152	273743900			16	16	0	153	148	5	70	26	44	104	96	8	37	37	0	62	62	0	90	87	3	86	84	2	13	13	0
chr1	273749551	0.000100924	0.00988853			Intergenic							34	25	9	117	101	16	39	32	7	145	110	35	46	35	11	112	79	33	167	107	60	111	76	35	37	26	11
chr1	273754460	5.46368e-05	0.00605043			Intergenic			273754283	273754624			13	1	12	70	4	66	38	0	38	84	4	80	26	3	23	52	8	44	76	10	66	64	14	50	22	4	18
chr1	273783598	3.7189e-05	0.00440616			Intergenic					273783067	273785066	16	8	8	137	76	61	18	3	15	108	64	44	63	30	33	24	3	21	66	30	36	68	15	53	12	5	7
chr1	273784918	3.10361e-05	0.00379372			Intergenic					273783067	273785066	23	7	16	125	25	100	52	44	8	92	25	67	27	2	25	82	57	25	82	35	47	68	39	29	21	8	13
chr1	273796469	1.31083e-11	6.0375e-09			Intergenic			273795995	273797359			14	4	10	86	27	59	10	8	2	113	55	58	43	5	38	42	37	5	62	51	11	56	35	21	14	12	2
chr1	273848738	3.8386e-06	0.000638534			Intergenic							12	3	9	98	77	21	51	22	29	79	53	26	57	35	22	94	30	64	133	51	82	80	42	38	19	9	10
chr1	273878471	1.40191e-06	0.000263888			Intergenic			273878327	273878558			10	7	3	66	54	12	58	29	29	80	69	11	39	24	15	91	48	43	87	43	44	97	48	49	19	10	9
chr1	273916734	5.94101e-05	0.00648948			Intergenic					273915177	273917688	15	6	9	65	14	51	42	20	22	50	12	38	50	10	40	67	27	40	103	48	55	102	52	50	14	8	6
chr1	273960246	1.17316e-06	0.000224808	NM_001014971	COL5A1	Intron	273934341	273972337					12	3	9	105	68	37	36	15	21	51	43	8	65	35	30	70	21	49	93	41	52	58	16	42	16	5	11
chr1	273988144	1.68614e-05	0.00227434	NM_001014971	COL5A1	Intron	273979721	273997870	273987960	273988684			13	8	5	147	114	33	13	7	6	88	58	30	37	35	2	40	21	19	89	53	36	83	36	47	14	11	3
chr1	274000832	6.30475e-06	0.000983126	NM_001014971	COL5A1	Exon	274000762	274000929	273998935	274001980			20	17	3	84	75	9	74	50	24	88	81	7	54	37	17	103	74	29	133	87	46	89	54	35	25	19	6
chr1	274014565	4.35873e-05	0.00503617	NM_001014971	COL5A1	Intron	274014371	274015192			274013559	274016143	11	6	5	78	41	37	11	0	11	75	34	41	20	0	20	72	25	47	56	15	41	44	8	36	10	3	7
chr1	274015434	2.73869e-07	6.06667e-05	NM_001014971	COL5A1	Intron	274015247	274015582			274013559	274016143	21	6	15	119	23	96	25	19	6	76	15	61	42	1	41	20	15	5	72	30	42	66	41	25	15	6	9
chr1	274015614	8.65374e-07	0.000171509	NM_001014971	COL5A1	Exon	274015583	274015636			274013559	274016143	16	15	1	137	128	9	20	14	6	86	73	13	46	33	13	55	41	14	98	81	17	74	43	31	16	14	2
chr1	274054272	8.39708e-05	0.00853407	NM_001014971	COL5A1	Intron	274053588	274054752	274054190	274054421			11	6	5	71	66	5	48	46	2	20	16	4	65	61	4	45	44	1	78	78	0	73	71	2	15	15	0
chr1	274056892	4.95465e-06	0.000798317	NM_001014971	COL5A1	Intron	274054861	274057002	274056590	274056893			25	3	22	122	27	95	53	4	49	109	17	92	53	14	39	79	4	75	101	7	94	81	0	81	13	1	12
chr1	274061681	1.54841e-05	0.00211983	NM_001014971	COL5A1	Intron	274061522	274062055					12	2	10	111	13	98	12	5	7	93	12	81	35	1	34	47	11	36	51	14	37	65	28	37	12	2	10
chr1	274083171	7.17017e-07	0.00014523	NM_001014971	COL5A1	Exon	274082762	274083264	274082628	274083218			34	25	9	118	71	47	29	16	13	118	93	25	50	31	19	77	61	16	99	79	20	77	71	6	33	28	5
chr1	274083174	2.31927e-05	0.00298374	NM_001014971	COL5A1	Exon	274082762	274083264	274082628	274083218			34	24	10	118	77	41	29	17	12	118	97	21	50	29	21	76	59	17	99	78	21	77	72	5	33	28	5
chr1	274095864	6.98093e-05	0.0073905			Intergenic			274095106	274096177			31	27	4	130	120	10	67	55	12	132	117	15	45	33	12	139	123	16	133	99	34	106	79	27	33	26	7
chr1	274106651	6.16497e-06	0.000964351	NM_213868	FCN2	Intron	274106373	274106711					33	20	13	128	97	31	55	27	28	88	59	29	99	75	24	104	30	74	120	71	49	114	56	58	26	12	14
chr1	274224509	4.5329e-06	0.000738201			Intergenic			274224255	274224836			15	0	15	68	0	68	48	0	48	71	0	71	37	0	37	76	0	76	76	0	76	72	1	71	14	3	11
chr10	500956	4.7031e-09	1.46272e-06			Intergenic							20	8	12	167	73	94	43	4	39	110	39	71	52	22	30	65	2	63	136	42	94	76	3	73	16	1	15
chr10	568008	3.11233e-06	0.00053383			Intergenic							28	12	16	143	36	107	31	9	22	141	51	90	69	26	43	78	33	45	190	99	91	123	59	64	44	19	25
chr10	589705	5.22334e-06	0.000835011			Intergenic							14	0	14	71	39	32	17	2	15	41	0	41	20	9	11	30	10	20	41	41	0	48	39	9	17	0	17
chr10	690790	6.2055e-07	0.000127412			Intergenic							26	17	9	258	139	119	32	20	12	172	84	88	96	38	58	91	84	7	139	94	45	109	86	23	22	12	10
chr10	715540	3.11051e-05	0.00380044			Intergenic							14	14	0	65	65	0	25	25	0	83	83	0	40	40	0	65	63	2	65	54	11	66	63	3	14	13	1
chr10	740500	7.77979e-07	0.000156028	NM_001123210	UCHL5	Intron	736548	745612	740444	740987			29	2	27	103	26	77	49	21	28	108	75	33	44	24	20	104	49	55	130	62	68	116	71	45	31	17	14
chr10	1037401	4.31086e-25	8.73436e-22			Intergenic					1035627	1037626	22	9	13	90	45	45	43	40	3	114	109	5	42	40	2	95	85	10	106	105	1	78	74	4	29	29	0
chr10	1065771	4.60215e-06	0.000748206			Intergenic			1065727	1065999			14	2	12	74	38	36	26	2	24	19	12	7	48	14	34	38	7	31	46	5	41	39	6	33	13	1	12
chr10	1065785	6.00688e-07	0.000123785			Intergenic			1065727	1065999			14	2	12	74	46	28	26	1	25	19	14	5	48	15	33	38	5	33	46	6	40	39	7	32	13	3	10
chr10	1065791	2.03223e-05	0.00267334			Intergenic			1065727	1065999			14	2	12	74	43	31	26	1	25	19	14	5	48	15	33	38	7	31	46	11	35	39	7	32	13	1	12
chr10	1065797	6.52248e-07	0.000133305			Intergenic			1065727	1065999			14	4	10	74	42	32	26	1	25	19	10	9	48	15	33	38	7	31	46	5	41	39	8	31	13	1	12
chr10	1065800	1.51462e-05	0.0020809			Intergenic			1065727	1065999			14	2	12	74	40	34	26	1	25	19	14	5	48	15	33	38	5	33	46	7	39	39	8	31	13	1	12
chr10	1065802	2.11936e-06	0.000379527			Intergenic			1065727	1065999			14	2	12	74	38	36	26	1	25	20	15	5	48	16	32	38	5	33	46	6	40	39	5	34	13	1	12
chr10	1065829	8.87745e-05	0.00892656			Intergenic			1065727	1065999			14	2	12	74	37	37	26	1	25	19	15	4	48	15	33	38	6	32	46	8	38	39	7	32	13	1	12
chr10	1065837	1.7283e-06	0.000316701			Intergenic			1065727	1065999			14	2	12	74	40	34	26	1	25	19	15	4	48	15	33	38	5	33	46	8	38	39	5	34	13	1	12
chr10	1065859	1.22214e-05	0.0017372			Intergenic			1065727	1065999			14	2	12	74	36	38	26	1	25	20	12	8	48	13	35	38	4	34	46	4	42	39	6	33	13	2	11
chr10	1234667	2.65028e-05	0.00332802			Intergenic							10	6	4	58	6	52	18	6	12	54	9	45	50	17	33	25	6	19	79	38	41	83	40	43	15	3	12
chr10	1380626	3.99554e-11	1.70929e-08			Intergenic							12	0	12	111	57	54	18	6	12	69	23	46	37	0	37	65	25	40	69	66	3	69	69	0	16	0	16
chr10	1380684	1.70259e-07	3.94947e-05			Intergenic							12	0	12	111	54	57	18	6	12	69	25	44	37	0	37	65	24	41	69	63	6	69	58	11	16	0	16
chr10	3522935	6.26384e-06	0.000977972			Intergenic			3522159	3522994			10	1	9	71	1	70	19	0	19	42	25	17	27	2	25	36	11	25	40	22	18	53	14	39	13	4	9
chr10	3522952	1.54136e-06	0.000286069			Intergenic			3522159	3522994			19	1	18	98	2	96	36	1	35	70	22	48	42	6	36	71	11	60	84	26	58	73	22	51	15	0	15
chr10	4148915	8.04208e-05	0.00824994			Intergenic							15	15	0	72	39	33	13	0	13	61	57	4	36	32	4	42	40	2	78	68	10	73	66	7	18	9	9
chr10	4165737	1.59698e-06	0.000295202			Intergenic							30	0	30	64	44	20	18	13	5	51	0	51	30	1	29	48	22	26	75	71	4	55	30	25	13	6	7
chr10	4350334	2.41346e-05	0.00308481			Intergenic							22	0	22	89	42	47	56	48	8	61	0	61	34	0	34	132	53	79	114	101	13	70	35	35	26	12	14
chr10	5433872	1.54147e-09	5.16332e-07			Intergenic							13	5	8	34	26	8	11	0	11	23	0	23	24	14	10	40	27	13	82	73	9	87	79	8	14	7	7
chr10	5556507	1.07496e-11	5.01612e-09			Intergenic							20	18	2	143	135	8	53	52	1	64	58	6	44	43	1	60	24	36	75	69	6	95	56	39	16	16	0
chr10	5913655	1.49504e-07	3.50262e-05			Intergenic							16	12	4	80	69	11	23	16	7	39	29	10	37	12	25	29	14	15	56	23	33	35	13	22	15	14	1
chr10	6810076	5.17274e-06	0.000828413			Intergenic							21	13	8	69	42	27	55	7	48	47	21	26	63	26	37	87	21	66	120	39	81	106	23	83	19	5	14
chr10	7003250	2.455e-05	0.00312826			Intergenic							16	4	12	109	10	99	30	6	24	58	4	54	52	21	31	77	18	59	94	15	79	96	39	57	14	3	11
chr10	7024534	1.01793e-11	4.7679e-09			Intergenic							20	9	11	117	75	42	44	35	9	41	33	8	21	7	14	44	44	0	105	103	2	112	93	19	19	19	0
chr10	7024537	2.25982e-09	7.36912e-07			Intergenic							20	8	12	116	61	55	44	30	14	41	36	5	21	5	16	44	44	0	105	100	5	113	78	35	19	17	2
chr10	7024543	3.9734e-08	1.04351e-05			Intergenic							20	12	8	116	57	59	44	28	16	41	37	4	21	8	13	44	42	2	105	98	7	113	75	38	19	18	1
chr10	7024568	3.96709e-09	1.24595e-06			Intergenic							20	9	11	116	56	60	44	27	17	43	33	10	21	2	19	44	43	1	105	98	7	113	71	42	19	18	1
chr10	7024570	2.34483e-12	1.20192e-09			Intergenic							20	8	12	116	50	66	44	22	22	43	38	5	21	4	17	44	44	0	105	97	8	113	71	42	19	19	0
chr10	7024575	4.74441e-09	1.47446e-06			Intergenic							20	9	11	116	54	62	44	27	17	43	38	5	21	5	16	44	44	0	105	96	9	113	70	43	19	19	0
chr10	7119772	6.23099e-08	1.57746e-05			Intergenic							14	1	13	74	33	41	11	6	5	57	0	57	35	1	34	25	16	9	70	43	27	44	37	7	20	7	13
chr10	9263386	2.86461e-06	0.000495026			Intergenic							14	12	2	104	97	7	25	25	0	64	55	9	29	28	1	74	69	5	110	83	27	77	56	21	11	8	3
chr10	9516791	9.67995e-18	9.18557e-15			Intergenic							13	5	8	84	78	6	11	11	0	74	35	39	26	0	26	28	10	18	46	0	46	50	27	23	13	0	13
chr10	9567084	2.04847e-06	0.000368263			Intergenic					9565245	9567244	15	1	14	43	3	40	44	22	22	57	14	43	61	19	42	63	34	29	129	68	61	87	43	44	17	2	15
chr10	9588111	9.7342e-12	4.56972e-09			Intergenic							15	6	9	52	29	23	37	16	21	73	67	6	35	34	1	75	39	36	84	80	4	56	55	1	11	11	0
chr10	10313620	8.02098e-07	0.000160296			Intergenic							21	19	2	100	47	53	10	5	5	97	27	70	45	42	3	47	43	4	78	70	8	47	24	23	12	11	1
chr10	10964900	2.05098e-07	4.66369e-05			Intergenic							11	0	11	115	0	115	14	0	14	113	0	113	47	18	29	23	0	23	108	0	108	45	22	23	25	0	25
chr10	12350867	8.73158e-07	0.000172914			Intergenic							16	7	9	60	20	40	29	6	23	73	27	46	31	6	25	50	1	49	93	76	17	67	41	26	20	7	13
chr10	12839598	8.35776e-05	0.00850505			Intergenic							11	2	9	64	52	12	34	18	16	72	52	20	46	28	18	42	22	20	126	62	64	116	54	62	18	9	9
chr10	13233504	1.88782e-10	7.30036e-08			Intergenic							13	13	0	77	74	3	33	32	1	76	32	44	33	26	7	65	64	1	92	1	91	74	65	9	18	10	8
chr10	13413299	2.7455e-20	3.49951e-17			Intergenic							24	0	24	132	1	131	40	0	40	84	14	70	52	0	52	63	1	62	79	73	6	82	2	80	17	8	9
chr10	13609659	4.89478e-05	0.00553423			Intergenic			13608756	13610264			20	0	20	71	0	71	44	0	44	79	0	79	36	0	36	70	0	70	97	0	97	86	7	79	12	0	12
chr10	14115982	5.21807e-08	1.34316e-05			Intergenic							18	0	18	65	0	65	30	0	30	83	47	36	36	0	36	59	0	59	104	98	6	82	0	82	23	9	14
chr10	14224101	5.60648e-06	0.000889016			Intergenic							27	26	1	76	45	31	76	40	36	97	89	8	40	20	20	101	99	2	106	100	6	82	1	81	24	9	15
chr10	14235939	3.18483e-14	2.04336e-11			Intergenic							10	0	10	104	2	102	25	0	25	39	15	24	37	0	37	48	0	48	55	46	9	38	4	34	12	6	6
chr10	14352234	2.17636e-20	2.81151e-17			Intergenic							28	27	1	112	109	3	72	66	6	93	52	41	54	52	2	108	97	11	126	0	126	94	88	6	40	21	19
chr10	14379672	2.69961e-06	0.000470315			Intergenic							32	15	17	113	21	92	26	7	19	143	43	100	65	23	42	85	31	54	165	85	80	131	56	75	38	17	21
chr10	14426906	1.86588e-09	6.1735e-07			Intergenic							11	0	11	84	0	84	16	0	16	47	16	31	41	0	41	34	0	34	57	49	8	59	0	59	11	5	6
chr10	14427291	5.6963e-11	2.38681e-08			Intergenic							23	0	23	86	1	85	45	0	45	138	55	83	37	0	37	69	0	69	78	73	5	74	0	74	23	13	10
chr10	14427292	1.34519e-15	1.00873e-12			Intergenic							28	0	28	70	0	70	39	0	39	97	36	61	37	0	37	97	0	97	97	92	5	73	3	70	11	7	4
chr10	14573760	5.07558e-09	1.57032e-06			Intergenic							12	0	12	80	0	80	24	0	24	65	23	42	25	0	25	63	0	63	76	56	20	48	0	48	15	5	10
chr10	14638896	1.48055e-06	0.000276307			Intergenic					14636977	14638976	14	0	14	73	6	67	23	2	21	79	26	53	41	1	40	57	6	51	132	62	70	45	7	38	15	5	10
chr10	14641128	3.23138e-06	0.000551211			Intergenic					14640182	14642217	15	14	1	68	56	12	51	27	24	70	57	13	37	29	8	93	48	45	148	84	64	92	46	46	22	16	6
chr10	14891627	6.81039e-15	4.67831e-12			Intergenic							28	0	28	57	0	57	20	0	20	94	44	50	35	0	35	70	0	70	118	114	4	65	1	64	23	13	10
chr10	15011012	1.30715e-05	0.0018358			Intergenic							11	8	3	103	84	19	52	42	10	67	26	41	36	31	5	67	61	6	84	0	84	89	67	22	20	14	6
chr10	15096074	7.62188e-22	1.13847e-18			Intergenic							22	0	22	82	39	43	28	8	20	76	23	53	41	0	41	69	0	69	91	0	91	61	0	61	19	0	19
chr10	15587716	4.66473e-05	0.00531909			Intergenic							14	4	10	94	88	6	32	16	16	56	18	38	41	36	5	70	63	7	96	89	7	70	63	7	12	8	4
chr10	16919115	3.05326e-12	1.5403e-09			Intergenic			16918997	16919535			10	2	8	119	67	52	23	1	22	39	25	14	30	14	16	36	0	36	37	6	31	23	1	22	14	0	14
chr10	16919162	2.64254e-12	1.344e-09			Intergenic			16918997	16919535			10	2	8	119	73	46	23	2	21	39	26	13	30	14	16	36	0	36	37	5	32	23	1	22	14	3	11
chr10	16919189	8.05066e-12	3.81974e-09			Intergenic			16918997	16919535			10	2	8	119	72	47	23	0	23	39	25	14	30	14	16	36	2	34	37	5	32	23	1	22	14	2	12
chr10	16919197	1.54207e-10	6.05365e-08			Intergenic			16918997	16919535			10	2	8	119	74	45	23	0	23	39	24	15	30	15	15	36	2	34	37	6	31	23	3	20	14	2	12
chr10	16919199	2.14392e-10	8.2097e-08			Intergenic			16918997	16919535			10	3	7	119	68	51	23	0	23	39	26	13	30	14	16	36	0	36	37	6	31	23	1	22	14	3	11
chr10	16919208	2.3443e-13	1.35458e-10			Intergenic			16918997	16919535			10	2	8	119	75	44	23	0	23	39	26	13	30	13	17	36	1	35	37	5	32	23	1	22	14	2	12
chr10	16919215	1.24251e-11	5.73983e-09			Intergenic			16918997	16919535			10	2	8	118	74	44	23	0	23	39	24	15	30	14	16	36	1	35	37	5	32	23	3	20	14	2	12
chr10	16919225	9.48737e-13	5.09176e-10			Intergenic			16918997	16919535			13	2	11	130	75	55	27	4	23	39	24	15	54	13	41	37	1	36	38	6	32	29	1	28	16	3	13
chr10	16947529	3.17705e-05	0.00386617			Intergenic							16	8	8	128	42	86	45	0	45	75	3	72	39	9	30	70	56	14	81	0	81	82	0	82	21	0	21
chr10	17006744	7.59737e-18	7.32671e-15			Intergenic							22	12	10	114	107	7	33	32	1	65	1	64	38	34	4	67	65	2	95	1	94	91	35	56	19	13	6
chr10	17067883	7.86568e-05	0.00811447			Intergenic			17067796	17068010			14	12	2	125	114	11	35	31	4	78	67	11	68	36	32	83	76	7	80	57	23	95	70	25	18	12	6
chr10	17660097	2.68769e-05	0.00336548			Intergenic							16	1	15	64	5	59	42	15	27	49	7	42	43	5	38	93	28	65	105	15	90	106	41	65	22	10	12
chr10	17880569	3.83879e-11	1.64337e-08			Intergenic							20	11	9	64	31	33	40	39	1	59	33	26	16	16	0	62	0	62	75	0	75	63	32	31	12	4	8
chr10	18220573	2.81097e-11	1.22916e-08			Intergenic							18	0	18	125	0	125	39	0	39	75	0	75	50	19	31	61	0	61	92	0	92	81	31	50	12	0	12
chr10	18771121	3.81801e-05	0.00450471	NM_001160092	SMYD3	Intron	18463779	18829548					18	10	8	62	29	33	53	30	23	70	47	23	52	17	35	82	60	22	105	77	28	82	55	27	24	21	3
chr10	19400161	2.42864e-10	9.23672e-08	NM_001348771	TLR5	Intron	19392779	19409961					12	10	2	96	70	26	35	26	9	72	53	19	41	22	19	61	41	20	62	42	20	62	1	61	14	12	2
chr10	19401828	6.15788e-06	0.000963363	NM_001348771	TLR5	Intron	19392779	19409961					12	9	3	15	10	5	64	43	21	16	10	6	14	4	10	79	40	39	78	51	27	41	1	40	12	5	7
chr10	19403197	1.37811e-30	4.40726e-27	NM_001348771	TLR5	Intron	19392779	19409961					16	14	2	102	93	9	34	29	5	79	65	14	49	28	21	49	41	8	51	46	5	100	0	100	11	10	1
chr10	19703566	9.41622e-05	0.00936535			Intergenic							25	12	13	67	62	5	16	3	13	30	30	0	44	40	4	10	8	2	14	14	0	19	17	2	13	13	0
chr10	19794079	2.52854e-16	2.04526e-13	NM_001100188	CAPN2	Intron	19793040	19794378			19792262	19794261	22	22	0	86	86	0	64	61	3	94	77	17	38	14	24	111	104	7	118	115	3	71	3	68	32	31	1
chr10	19794387	4.05547e-12	2.00364e-09	NM_001100188	CAPN2	Exon	19794379	19794462	19794262	19794477			10	7	3	89	84	5	39	37	2	54	49	5	34	15	19	54	51	3	53	40	13	30	0	30	10	9	1
chr10	19801125	6.86404e-15	4.71256e-12	NM_001100188	CAPN2	Intron	19800639	19801588			19800886	19802885	14	12	2	89	87	2	39	23	16	52	51	1	34	17	17	50	46	4	69	67	2	64	1	63	11	11	0
chr10	21414434	2.88677e-05	0.00357304			Intergenic							22	7	15	104	22	82	27	10	17	116	18	98	59	21	38	51	15	36	93	44	49	68	31	37	15	4	11
chr10	22735558	1.57353e-06	0.00029117	NM_001267893	NR5A2	Intron	22728190	22742780	22734681	22735560			13	1	12	123	10	113	35	2	33	101	7	94	33	4	29	70	10	60	77	10	67	79	27	52	11	2	9
chr10	22748253	6.95603e-07	0.000141237	NM_001267893	NR5A2	Intron	22748222	22806070					16	10	6	26	1	25	35	28	7	40	26	14	36	26	10	111	105	6	107	91	16	49	30	19	23	19	4
chr10	22756946	2.18883e-18	2.23931e-15	NM_001267893	NR5A2	Intron	22748222	22806070					12	5	7	84	0	84	22	8	14	57	29	28	41	17	24	62	51	11	63	57	6	56	16	40	15	14	1
chr10	22778291	4.3322e-20	5.43839e-17	NM_001267893	NR5A2	Intron	22748222	22806070					22	10	12	105	77	28	25	13	12	77	30	47	45	20	25	32	0	32	98	0	98	36	21	15	13	0	13
chr10	22834689	7.00144e-23	1.16728e-19	NM_001267893	NR5A2	Intron	22812592	22863472					16	7	9	81	70	11	16	6	10	64	27	37	32	15	17	60	24	36	105	0	105	65	29	36	33	0	33
chr10	22878677	6.54746e-05	0.00701941			Intergenic			22878454	22878688			12	0	12	66	1	65	56	1	55	62	9	53	42	5	37	93	4	89	111	1	110	85	27	58	22	1	21
chr10	23122741	1.0611e-10	4.2748e-08			Intergenic					23121136	23123135	14	0	14	132	126	6	24	21	3	112	53	59	64	34	30	49	0	49	107	0	107	105	94	11	16	6	10
chr10	23122789	4.83445e-10	1.75139e-07			Intergenic					23121136	23123135	14	0	14	132	127	5	24	22	2	112	44	68	64	33	31	49	0	49	105	0	105	105	94	11	16	6	10
chr10	23362738	1.29662e-06	0.000246005			Intergenic							42	12	30	112	69	43	78	60	18	90	19	71	49	17	32	123	44	79	108	0	108	98	48	50	28	14	14
chr10	23433650	1.56503e-08	4.42994e-06			Intergenic			23433515	23433735			13	6	7	86	16	70	54	42	12	103	31	72	34	3	31	52	36	16	102	52	50	94	67	27	24	13	11
chr10	23490667	1.60964e-05	0.00218729			Intergenic			23490626	23491418			16	0	16	67	0	67	53	0	53	72	0	72	50	1	49	84	0	84	90	0	90	74	8	66	19	1	18
chr10	23519541	1.8981e-07	4.35909e-05			Intergenic							15	10	5	52	52	0	19	4	15	41	38	3	39	35	4	69	23	46	86	46	40	56	30	26	13	9	4
chr10	23519572	2.94973e-08	7.92398e-06			Intergenic							15	11	4	52	50	2	19	7	12	41	40	1	39	35	4	69	24	45	86	44	42	56	29	27	13	11	2
chr10	23519575	4.159e-06	0.000684388			Intergenic							15	10	5	52	48	4	19	10	9	42	39	3	41	39	2	67	30	37	86	47	39	55	31	24	13	11	2
chr10	23641825	6.29285e-07	0.000129057			Intergenic							19	11	8	112	89	23	50	13	37	92	50	42	57	31	26	97	44	53	164	78	86	107	42	65	26	9	17
chr10	23734720	4.07523e-07	8.70494e-05			Intergenic							14	1	13	116	15	101	14	9	5	91	12	79	49	4	45	45	24	21	58	22	36	60	28	32	12	0	12
chr10	23747089	1.88636e-06	0.000342686			Intergenic							15	15	0	76	72	4	14	14	0	58	51	7	25	23	2	60	54	6	73	63	10	75	48	27	21	19	2
chr10	23789273	9.50338e-05	0.00943545	NM_213912	TNNI1	Intron	23788612	23789421					18	9	9	127	92	35	37	10	27	95	49	46	70	37	33	68	27	41	121	63	58	80	28	52	33	15	18
chr10	23789347	2.66304e-08	7.20516e-06	NM_213912	TNNI1	Intron	23788612	23789421					19	9	10	129	32	97	32	24	8	94	38	56	70	28	42	56	42	14	94	54	40	78	45	33	23	16	7
chr10	23900859	2.19867e-05	0.00285874			Intergenic							20	5	15	62	34	28	39	6	33	62	19	43	49	24	25	82	18	64	122	23	99	99	21	78	20	2	18
chr10	24014980	3.30769e-05	0.00398963			Intergenic							30	30	0	101	89	12	66	64	2	105	93	12	40	35	5	93	88	5	122	108	14	80	53	27	32	26	6
chr10	24016138	1.27422e-05	0.00179747			Intergenic					24016137	24018136	11	10	1	60	50	10	13	12	1	75	61	14	22	14	8	43	31	12	57	42	15	58	26	32	12	10	2
chr10	24096407	3.57676e-05	0.00426456			Intergenic							31	18	13	115	84	31	16	7	9	161	106	55	68	38	30	74	40	34	120	64	56	91	40	51	22	11	11
chr10	24191761	7.10828e-10	2.51436e-07			Intergenic					24191442	24193441	12	7	5	89	64	25	29	7	22	106	68	38	68	40	28	71	14	57	111	50	61	69	13	56	20	10	10
chr10	24195322	4.28118e-06	0.000701432			Intergenic					24193913	24195912	18	17	1	58	53	5	23	22	1	90	40	50	34	30	4	48	24	24	82	0	82	69	67	2	21	13	8
chr10	24241631	4.28357e-05	0.00496084			Intergenic			24241536	24242037			15	2	13	100	22	78	12	4	8	67	10	57	66	30	36	41	11	30	115	48	67	90	37	53	11	4	7
chr10	24338510	9.83165e-05	0.00968868			Intergenic							22	9	13	119	26	93	40	23	17	114	26	88	65	14	51	86	41	45	100	37	63	78	39	39	17	10	7
chr10	24451527	9.91803e-05	0.00975604			Intergenic					24449571	24451570	14	3	11	67	6	61	18	13	5	49	7	42	26	2	24	46	26	20	58	17	41	60	28	32	10	2	8
chr10	24451822	3.07885e-05	0.00376805			Intergenic			24451571	24452218			14	12	2	98	90	8	51	38	13	82	69	13	26	25	1	86	66	20	84	64	20	112	73	39	13	11	2
chr10	24451823	5.11373e-05	0.00573818			Intergenic			24451571	24452218			22	6	16	99	11	88	33	13	20	93	34	59	36	0	36	76	38	38	106	41	65	85	32	53	19	7	12
chr10	24665639	4.9455e-05	0.00558395			Intergenic							16	9	7	101	59	42	26	18	8	86	69	17	37	20	17	45	36	9	74	59	15	44	37	7	11	10	1
chr10	25425772	1.67075e-17	1.54879e-14			Intergenic							31	15	16	99	0	99	36	23	13	103	0	103	32	0	32	96	0	96	115	0	115	73	0	73	23	0	23
chr10	26699362	2.91294e-06	0.00050275			Intergenic			26699089	26699479			14	10	4	87	70	17	57	44	13	66	46	20	52	34	18	89	75	14	80	30	50	74	42	32	24	14	10
chr10	26699367	9.57636e-07	0.000187613			Intergenic			26699089	26699479			14	12	2	87	77	10	57	43	14	66	52	14	52	41	11	89	81	8	80	33	47	74	45	29	24	19	5
chr10	26699454	3.80515e-05	0.00449416			Intergenic			26699089	26699479			25	22	3	89	84	5	51	45	6	61	54	7	49	37	12	100	87	13	100	57	43	81	67	14	29	25	4
chr10	27108703	4.01907e-05	0.00470357			Intergenic			27108563	27108846			17	4	13	138	37	101	24	6	18	68	11	57	55	11	44	40	5	35	95	6	89	64	8	56	10	1	9
chr10	27132996	5.87019e-30	1.78116e-26			Intergenic							13	6	7	110	108	2	31	30	1	69	40	29	40	19	21	38	38	0	76	0	76	66	34	32	16	0	16
chr10	27214730	1.38108e-19	1.64928e-16			Intergenic							10	4	6	66	62	4	19	19	0	32	16	16	36	16	20	36	36	0	61	0	61	52	21	31	13	1	12
chr10	27600073	1.16734e-10	4.67552e-08	NM_213979	FBP1	Intron	27588871	27604347					32	6	26	65	59	6	46	43	3	91	34	57	38	21	17	76	70	6	100	1	99	67	36	31	23	1	22
chr10	29465407	9.38288e-05	0.00933892			Intergenic							22	21	1	86	84	2	21	20	1	80	77	3	38	32	6	40	40	0	91	72	19	79	66	13	22	21	1
chr10	30152782	5.55293e-05	0.0061318			Intergenic							22	15	7	115	68	47	20	7	13	90	57	33	83	26	57	52	20	32	100	38	62	68	19	49	22	16	6
chr10	31000992	3.13981e-05	0.0038291			Intergenic			31000652	31001558			14	2	12	69	8	61	51	10	41	61	1	60	24	2	22	52	0	52	73	3	70	50	0	50	11	0	11
chr10	31020382	8.99555e-07	0.000177295			Intergenic							16	6	10	77	17	60	37	29	8	67	23	44	46	5	41	43	34	9	75	44	31	56	32	24	14	11	3
chr10	31141549	2.04972e-05	0.00269215			Intergenic			31141418	31142558			17	2	15	53	4	49	27	0	27	49	0	49	30	0	30	58	0	58	54	0	54	53	0	53	17	0	17
chr10	32416336	2.9103e-05	0.0035968			Intergenic							23	9	14	205	87	118	43	2	41	143	54	89	77	14	63	91	21	70	153	31	122	142	38	104	19	4	15
chr10	32432978	4.51964e-05	0.00518644			Intergenic			32432733	32433137			18	0	18	53	0	53	53	0	53	54	0	54	43	0	43	58	1	57	92	0	92	67	4	63	12	2	10
chr10	35750530	2.65347e-05	0.00333034			Intergenic							17	4	13	103	17	86	41	30	11	85	8	77	39	4	35	63	30	33	89	35	54	61	35	26	18	4	14
chr10	39754244	1.00227e-09	3.45872e-07			Intergenic							19	10	9	80	77	3	57	29	28	88	76	12	48	46	2	126	118	8	119	114	5	89	86	3	27	26	1
chr10	40058492	5.42193e-27	1.24449e-23	NM_001201485	BAMBI	Exon	40058095	40058590	40058395	40058638			23	6	17	88	30	58	36	18	18	66	0	66	43	0	43	61	0	61	118	0	118	78	0	78	23	0	23
chr10	40058493	7.63483e-24	1.38658e-20	NM_001201485	BAMBI	Exon	40058095	40058590	40058395	40058638			11	5	6	66	27	39	28	12	16	72	0	72	32	0	32	52	0	52	70	0	70	71	0	71	12	1	11
chr10	40952903	2.38711e-05	0.00305709			Intergenic			40952722	40953660			16	2	14	86	6	80	42	4	38	64	1	63	69	0	69	71	1	70	94	1	93	91	0	91	11	0	11
chr10	41380234	2.34162e-05	0.0030072			Intergenic			41380035	41380628			18	3	15	71	44	27	35	2	33	75	49	26	34	19	15	60	5	55	60	10	50	48	20	28	13	0	13
chr10	41456685	1.66949e-05	0.00225614			Intergenic							22	17	5	85	72	13	28	24	4	74	66	8	30	29	1	65	47	18	90	73	17	88	47	41	14	11	3
chr10	41595403	4.08612e-05	0.00476812			Intergenic							21	19	2	117	110	7	66	62	4	65	63	2	46	44	2	75	75	0	86	86	0	73	73	0	19	19	0
chr10	44290862	1.07462e-07	2.59738e-05			Intergenic							15	10	5	133	87	46	13	8	5	75	51	24	76	40	36	57	49	8	99	84	15	89	82	7	17	14	3
chr10	44862463	7.76955e-05	0.00803243			Intergenic							13	0	13	20	0	20	26	0	26	47	32	15	38	24	14	78	31	47	74	0	74	66	0	66	19	0	19
chr10	47197911	1.23666e-19	1.485e-16			Intergenic							23	16	7	193	86	107	23	16	7	184	94	90	38	35	3	95	66	29	90	88	2	68	52	16	23	23	0
chr10	47197920	1.46553e-17	1.36466e-14			Intergenic							23	16	7	193	83	110	23	18	5	184	89	95	38	34	4	95	62	33	90	89	1	68	49	19	23	22	1
chr10	47197952	2.80162e-19	3.2212e-16			Intergenic							23	16	7	193	84	109	23	16	7	184	98	86	38	35	3	95	62	33	90	87	3	68	53	15	23	23	0
chr10	48281750	2.78881e-07	6.17222e-05			Intergenic							40	7	33	94	15	79	58	16	42	97	11	86	70	28	42	81	25	56	132	39	93	105	53	52	25	6	19
chr10	50633938	5.65604e-05	0.00623132			Intergenic							18	18	0	105	52	53	52	48	4	103	98	5	39	38	1	116	41	75	114	112	2	66	65	1	20	19	1
chr10	50662252	1.8445e-06	0.000335767			Intergenic							21	21	0	72	44	28	12	12	0	69	65	4	39	39	0	40	31	9	98	94	4	50	49	1	18	17	1
chr10	50662285	4.6719e-08	1.21261e-05			Intergenic							21	17	4	72	45	27	12	12	0	69	63	6	40	39	1	40	32	8	98	91	7	50	49	1	18	18	0
chr10	51374545	8.14097e-05	0.00833077			Intergenic							16	15	1	94	90	4	13	2	11	83	73	10	37	18	19	50	16	34	69	63	6	57	29	28	25	24	1
chr10	52208121	3.13949e-06	0.000537525			Intergenic							16	16	0	112	85	27	22	22	0	74	70	4	43	41	2	82	75	7	90	86	4	79	77	2	21	21	0
chr10	52208168	1.388e-27	3.39909e-24			Intergenic							16	16	0	84	2	82	22	22	0	74	69	5	44	43	1	78	34	44	93	91	2	78	77	1	21	21	0
chr10	52252473	1.73024e-27	4.1796e-24	NM_001195781	PIP4K2A	Intron	52224807	52338385					20	20	0	90	2	88	14	11	3	86	81	5	24	21	3	56	31	25	80	78	2	62	58	4	15	15	0
chr10	52393950	4.99378e-27	1.15259e-23	NM_001195781	PIP4K2A	Intron	52373878	52394930					17	16	1	78	2	76	10	9	1	69	67	2	40	38	2	50	24	26	71	69	2	49	49	0	18	18	0
chr10	52445472	8.30011e-05	0.00845708			Intergenic			52445273	52447376			22	9	13	118	63	55	51	21	30	96	52	44	44	12	32	111	36	75	116	36	80	82	34	48	22	3	19
chr10	52483481	1.28313e-05	0.00180798			Intergenic			52482685	52483651			13	0	13	91	0	91	45	0	45	74	0	74	40	0	40	73	0	73	72	3	69	98	3	95	18	3	15
chr10	52483538	0.000102363	0.00999716			Intergenic			52482685	52483651			13	0	13	91	0	91	46	0	46	74	0	74	40	0	40	75	0	75	72	0	72	98	5	93	18	1	17
chr10	52595707	4.97576e-05	0.00561304	NM_001285971	BMI1	Intron	52591167	52595920	52595427	52597337			14	3	11	85	2	83	55	1	54	99	0	99	46	1	45	98	0	98	114	0	114	63	0	63	17	0	17
chr10	52677256	6.26705e-05	0.00677955			Intergenic			52677025	52677352			24	0	24	81	0	81	60	0	60	67	0	67	42	0	42	93	1	92	90	0	90	70	4	66	22	2	20
chr10	52911926	4.03944e-12	1.99731e-09			Intergenic							11	10	1	84	36	48	12	4	8	92	48	44	46	42	4	18	16	2	39	36	3	20	18	2	13	12	1
chr10	53066760	3.15586e-06	0.000539809			Intergenic			53065708	53067189			18	0	18	95	0	95	37	0	37	101	0	101	41	0	41	83	0	83	68	0	68	76	10	66	27	0	27
chr10	53078530	3.52512e-07	7.61883e-05			Intergenic							10	9	1	77	0	77	30	16	14	66	60	6	30	13	17	41	2	39	60	60	0	45	15	30	15	13	2
chr10	53322488	7.44995e-05	0.00777261			Intergenic			53322208	53323915			10	0	10	70	0	70	24	0	24	43	0	43	39	0	39	35	0	35	64	0	64	64	2	62	10	2	8
chr10	53562397	7.81993e-10	2.75122e-07			Intergenic					53560834	53562833	10	0	10	141	91	50	22	5	17	48	0	48	41	14	27	52	19	33	65	11	54	44	11	33	10	0	10
chr10	56130044	3.43211e-06	0.000580832	NM_213968	ITGB1	Intron	56111567	56130368	56129857	56130854			28	0	28	73	0	73	37	0	37	68	0	68	37	0	37	71	0	71	103	2	101	57	7	50	18	1	17
chr10	56633946	7.53287e-08	1.87687e-05			Intergenic							12	6	6	78	0	78	19	1	18	45	39	6	24	0	24	53	24	29	108	54	54	52	31	21	12	0	12
chr10	56826728	7.82149e-06	0.00118359			Intergenic							12	1	11	69	62	7	39	34	5	73	36	37	44	20	24	40	39	1	34	32	2	34	2	32	16	3	13
chr10	57343857	9.47561e-07	0.000185814			Intergenic							24	22	2	83	81	2	55	50	5	87	81	6	50	44	6	99	78	21	127	110	17	67	51	16	26	18	8
chr10	57386311	9.60835e-05	0.00952219			Intergenic							16	7	9	96	94	2	17	15	2	74	50	24	38	17	21	40	39	1	81	79	2	60	24	36	20	10	10
chr10	58296623	4.66158e-12	2.28315e-09			Intergenic							14	6	8	92	0	92	19	6	13	57	16	41	29	11	18	84	33	51	127	58	69	84	44	40	29	9	20
chr10	59227041	6.41682e-09	1.95083e-06	NM_001243935	CAMK1D	Intron	59218270	59235336					16	0	16	124	0	124	46	19	27	96	49	47	46	21	25	79	1	78	98	47	51	100	44	56	22	6	16
chr10	59228843	8.23563e-06	0.00123827	NM_001243935	CAMK1D	Intron	59218270	59235336					16	13	3	143	121	22	34	12	22	74	25	49	39	16	23	51	43	8	81	40	41	60	32	28	17	6	11
chr10	59228844	9.76645e-07	0.000190946	NM_001243935	CAMK1D	Intron	59218270	59235336					16	14	2	77	63	14	20	9	11	55	20	35	43	16	27	44	41	3	50	17	33	51	20	31	12	4	8
chr10	59394545	1.10909e-07	2.67136e-05	NM_001243935	CAMK1D	Intron	59359043	59454303					11	3	8	71	2	69	16	10	6	38	22	16	35	18	17	34	17	17	65	42	23	70	29	41	10	6	4
chr10	59394822	5.73432e-11	2.40193e-08	NM_001243935	CAMK1D	Intron	59359043	59454303					15	4	11	109	1	108	42	21	21	79	44	35	35	16	19	81	39	42	94	49	45	84	44	40	19	7	12
chr10	59394823	1.41954e-09	4.77807e-07	NM_001243935	CAMK1D	Intron	59359043	59454303					21	8	13	92	0	92	54	19	35	79	41	38	38	14	24	102	46	56	91	43	48	90	49	41	17	5	12
chr10	59681529	3.56768e-06	0.000600507			Intergenic							15	4	11	97	27	70	39	17	22	48	9	39	63	24	39	60	29	31	86	43	43	85	43	42	18	12	6
chr10	59724348	9.70233e-16	7.35983e-13	NM_001243823	CDC123	Intron	59719971	59726186			59724307	59726306	20	5	15	127	0	127	52	12	40	76	49	27	41	26	15	106	43	63	127	43	84	80	52	28	20	11	9
chr10	60067533	3.04186e-13	1.73269e-10			Intergenic							24	0	24	152	0	152	72	0	72	107	0	107	50	0	50	66	0	66	107	49	58	100	0	100	16	0	16
chr10	60436150	4.05358e-05	0.00473778			Intergenic							12	5	7	88	0	88	38	22	16	60	35	25	38	25	13	55	21	34	67	26	41	48	20	28	10	7	3
chr10	60586503	8.04318e-06	0.00121227			Intergenic							19	16	3	87	83	4	39	30	9	114	97	17	44	41	3	74	54	20	120	88	32	81	55	26	27	22	5
chr10	60588053	6.82993e-06	0.00105301			Intergenic							31	0	31	111	1	110	82	32	50	86	0	86	43	23	20	100	0	100	134	0	134	122	0	122	19	0	19
chr10	60653516	8.29722e-05	0.00845519			Intergenic							22	7	15	83	13	70	45	38	7	85	22	63	33	3	30	106	61	45	96	46	50	78	43	35	38	16	22
chr10	63092832	2.00248e-07	4.56902e-05			Intergenic							15	13	2	112	100	12	27	9	18	54	50	4	32	29	3	69	66	3	77	77	0	66	65	1	10	10	0
chr10	63391973	5.85579e-06	0.000922601			Intergenic			63387055	63394037			11	0	11	48	0	48	31	0	31	35	0	35	27	0	27	56	1	55	60	2	58	38	2	36	14	4	10
chr10	63754912	1.8044e-06	0.000329286			Intergenic			63754450	63755140			12	3	9	84	7	77	30	9	21	49	6	43	49	8	41	91	51	40	67	17	50	79	28	51	10	4	6
chr10	63764056	4.4895e-05	0.00515804			Intergenic					63763824	63765823	17	10	7	75	15	60	44	24	20	51	14	37	57	9	48	56	33	23	77	42	35	52	22	30	23	18	5
chr10	63994005	3.58026e-31	1.21979e-27			Intergenic					63992521	63994520	18	18	0	68	66	2	12	7	5	66	59	7	45	41	4	29	26	3	51	49	2	46	2	44	22	0	22
chr10	64006490	2.96386e-05	0.00365319			Intergenic			64006224	64006495			22	11	11	90	63	27	22	18	4	124	87	37	23	16	7	47	35	12	98	79	19	78	73	5	23	18	5
chr10	64011683	9.88151e-05	0.00972703			Intergenic					64010583	64012582	26	2	24	135	14	121	37	26	11	86	5	81	45	1	44	72	47	25	125	27	98	98	35	63	20	2	18
chr10	64023892	1.56155e-09	5.22496e-07			Intergenic					64022572	64024571	11	11	0	141	139	2	15	5	10	66	65	1	32	30	2	50	48	2	83	83	0	61	33	28	10	5	5
chr10	64023917	4.72752e-16	3.71056e-13			Intergenic					64022572	64024571	11	11	0	141	137	4	15	15	0	66	60	6	32	30	2	50	46	4	83	83	0	61	27	34	10	4	6
chr10	64050689	5.23338e-06	0.000836508			Intergenic			64050248	64050814			11	5	6	114	48	66	47	38	9	71	27	44	47	1	46	72	0	72	66	52	14	67	62	5	10	10	0
chr10	64060822	2.73529e-05	0.00341305			Intergenic			64060319	64061677			23	12	11	96	78	18	24	12	12	63	48	15	22	11	11	77	34	43	87	39	48	70	47	23	28	10	18
chr10	64060830	5.77633e-06	0.000911698			Intergenic			64060319	64061677			23	12	11	96	90	6	24	16	8	63	48	15	22	14	8	77	53	24	87	47	40	70	50	20	28	12	16
chr10	64778284	2.22431e-05	0.00288423			Intergenic			64778087	64778292			22	3	19	96	51	45	55	10	45	100	33	67	51	11	40	91	10	81	118	36	82	91	14	77	24	4	20
chr10	64823499	2.14168e-05	0.00279457			Intergenic							23	8	15	110	23	87	42	21	21	57	5	52	50	18	32	50	12	38	120	75	45	115	48	67	13	1	12
chr10	64823512	2.17719e-07	4.92726e-05			Intergenic							14	14	0	92	44	48	20	14	6	55	18	37	33	30	3	38	18	20	39	36	3	73	70	3	11	4	7
chr10	64849820	7.29479e-10	2.5774e-07			Intergenic							37	37	0	124	118	6	42	21	21	110	57	53	30	19	11	109	45	64	117	107	10	66	24	42	31	16	15
chr10	64862803	1.1371e-06	0.000218538			Intergenic							22	12	10	107	74	33	76	18	58	44	25	19	36	13	23	57	10	47	126	57	69	92	24	68	13	3	10
chr10	64890566	2.15069e-05	0.00280456			Intergenic			64889890	64890944			11	6	5	109	35	74	12	9	3	72	36	36	28	8	20	46	34	12	85	44	41	62	44	18	17	9	8
chr10	65069994	5.92384e-05	0.00647641			Intergenic			65069660	65070177			15	10	5	72	1	71	40	0	40	62	0	62	33	17	16	79	0	79	73	0	73	48	0	48	23	0	23
chr10	65082187	2.39495e-07	5.3722e-05			Intergenic					65081178	65082571	14	8	6	92	2	90	15	10	5	71	52	19	42	36	6	45	26	19	41	0	41	55	33	22	20	19	1
chr10	65083013	3.01278e-08	8.07939e-06			Intergenic					65082969	65084968	11	10	1	80	63	17	29	1	28	88	38	50	35	10	25	68	15	53	64	38	26	71	17	54	17	4	13
chr10	65094097	2.02751e-05	0.00266924			Intergenic			65093838	65094199			13	13	0	94	92	2	28	13	15	91	50	41	30	15	15	46	21	25	76	73	3	45	18	27	11	5	6
chr10	65280927	5.94245e-05	0.00649024			Intergenic							11	9	2	103	18	85	31	21	10	78	18	60	49	10	39	39	26	13	83	42	41	65	35	30	11	3	8
chr10	65320807	2.09608e-06	0.000376007			Intergenic			65320546	65320841			17	6	11	76	15	61	24	16	8	85	23	62	23	4	19	61	46	15	72	29	43	47	26	21	17	11	6
chr10	65322856	5.78289e-06	0.000912618			Intergenic							14	3	11	65	47	18	23	9	14	70	50	20	37	25	12	35	16	19	105	40	65	58	19	39	10	3	7
chr10	65341898	4.54564e-06	0.000739889			Intergenic							17	12	5	108	46	62	19	0	19	69	31	38	47	17	30	62	36	26	46	0	46	50	2	48	10	5	5
chr10	65347282	4.21252e-05	0.00489223			Intergenic							28	18	10	69	39	30	21	20	1	63	18	45	36	15	21	70	47	23	56	55	1	52	44	8	16	9	7
chr10	65347330	1.4972e-10	5.8905e-08			Intergenic							33	15	18	107	70	37	22	5	17	63	46	17	34	20	14	96	50	46	57	7	50	46	1	45	15	7	8
chr10	65376956	9.64771e-05	0.00955054			Intergenic							10	10	0	93	90	3	21	8	13	65	27	38	48	14	34	54	24	30	62	61	1	59	27	32	10	5	5
chr10	65385527	5.88962e-10	2.10303e-07			Intergenic			65384986	65385771			14	11	3	134	124	10	31	13	18	68	27	41	34	18	16	56	30	26	97	57	40	84	40	44	13	5	8
chr10	65385602	5.14343e-07	0.000107685			Intergenic			65384986	65385771			14	10	4	133	121	12	32	25	7	66	62	4	33	30	3	55	46	9	96	63	33	83	56	27	11	8	3
chr10	65400025	1.59998e-08	4.52064e-06			Intergenic			65399852	65400228			13	5	8	95	42	53	22	0	22	58	27	31	42	16	26	50	29	21	80	1	79	77	3	74	10	5	5
chr10	65418526	3.64613e-08	9.63045e-06			Intergenic							16	5	11	111	40	71	15	0	15	62	31	31	33	16	17	27	10	17	62	0	62	61	0	61	11	4	7
chr10	65958295	3.13995e-07	6.85664e-05			Intergenic							14	13	1	32	26	6	40	31	9	47	41	6	47	33	14	51	47	4	57	38	19	59	23	36	13	8	5
chr10	66040305	1.03155e-36	5.9688e-33			Intergenic							16	5	11	80	76	4	31	14	17	65	28	37	48	0	48	57	21	36	80	0	80	76	3	73	17	5	12
chr10	66040307	2.25174e-31	7.84665e-28			Intergenic							16	5	11	80	69	11	31	12	19	65	27	38	48	0	48	57	19	38	80	0	80	76	3	73	17	5	12
chr10	66055302	1.6694e-09	5.56935e-07			Intergenic							14	1	13	104	9	95	47	12	35	126	17	109	71	35	36	88	24	64	159	56	103	113	48	65	22	4	18
chr10	66055306	2.94611e-36	1.62172e-32			Intergenic							13	8	5	102	3	99	40	16	24	112	57	55	36	34	2	68	30	38	108	102	6	69	62	7	20	10	10
chr10	66112064	4.16408e-14	2.63494e-11			Intergenic			66111510	66112730			15	4	11	40	30	10	21	3	18	52	15	37	31	2	29	43	5	38	85	9	76	60	4	56	16	0	16
chr10	66112301	7.98217e-05	0.00820348			Intergenic			66111510	66112730			12	1	11	90	6	84	34	5	29	70	15	55	34	7	27	74	12	62	37	11	26	45	18	27	12	1	11
chr10	66112314	3.137e-05	0.00382721			Intergenic			66111510	66112730			11	4	7	90	64	26	29	15	14	51	33	18	22	0	22	64	36	28	18	0	18	21	3	18	12	9	3
chr10	66117167	2.50106e-05	0.00317655			Intergenic			66116978	66117216			17	6	11	48	44	4	29	12	17	95	49	46	74	31	43	102	35	67	148	47	101	98	48	50	18	7	11
chr10	66150717	7.4953e-05	0.00781009			Intergenic							12	11	1	39	36	3	34	27	7	31	27	4	20	17	3	71	50	21	64	44	20	52	31	21	12	10	2
chr10	66188457	2.33517e-10	8.89485e-08			Intergenic					66187341	66189340	14	6	8	85	78	7	34	15	19	69	41	28	63	26	37	76	30	46	141	49	92	113	55	58	17	6	11
chr10	66188458	3.60826e-12	1.79625e-09			Intergenic					66187341	66189340	19	2	17	96	2	94	50	9	41	74	10	64	61	9	52	66	23	43	90	32	58	105	36	69	15	5	10
chr10	66188557	2.94335e-36	1.62172e-32			Intergenic					66187341	66189340	17	10	7	96	2	94	40	28	12	69	33	36	51	48	3	46	28	18	59	52	7	71	70	1	12	8	4
chr10	66416570	2.56986e-05	0.00324603			Intergenic							16	12	4	68	13	55	26	15	11	69	21	48	70	22	48	39	30	9	107	55	52	92	56	36	31	15	16
chr10	66470341	1.2196e-05	0.00173438			Intergenic							26	10	16	106	92	14	73	28	45	71	51	20	43	27	16	123	66	57	119	55	64	129	59	70	14	8	6
chr10	66492025	1.3413e-07	3.17051e-05	NM_001134353	KLF6	Exon	66491751	66492174	66491814	66492209			17	17	0	86	85	1	47	45	2	81	80	1	30	29	1	90	86	4	89	86	3	61	47	14	18	14	4
chr10	66492077	1.60593e-05	0.0021832	NM_001134353	KLF6	Exon	66491751	66492174	66491814	66492209			20	17	3	84	80	4	53	45	8	85	80	5	30	30	0	111	86	25	96	86	10	67	42	25	19	16	3
chr10	66503737	3.28093e-05	0.00396389			Intergenic							13	5	8	85	27	58	16	12	4	60	22	38	35	3	32	31	24	7	57	37	20	57	37	20	16	6	10
chr10	66662620	4.44637e-17	3.90917e-14			Intergenic			66662449	66662682			12	11	1	86	36	50	25	0	25	60	36	24	37	0	37	45	21	24	70	0	70	66	1	65	12	0	12
chr10	66680479	1.18684e-11	5.50722e-09			Intergenic							26	26	0	108	63	45	81	39	42	91	62	29	37	16	21	121	61	60	99	26	73	95	33	62	20	6	14
chr10	66680491	1.21786e-07	2.90355e-05			Intergenic							19	15	4	102	55	47	52	19	33	78	50	28	50	9	41	89	40	49	97	25	72	80	30	50	21	2	19
chr10	66680492	1.02609e-12	5.47852e-10			Intergenic							26	24	2	109	60	49	81	22	59	91	60	31	37	10	27	121	53	68	99	20	79	95	22	73	20	4	16
chr10	66680505	3.31582e-06	0.000562758			Intergenic							19	19	0	102	70	32	52	30	22	78	59	19	50	13	37	89	49	40	97	49	48	80	43	37	21	7	14
chr10	66680506	1.08479e-06	0.000209239			Intergenic							26	25	1	109	68	41	81	38	43	91	66	25	37	19	18	121	59	62	99	45	54	95	38	57	20	10	10
chr10	66680508	4.583e-06	0.000745288			Intergenic							26	21	5	109	71	38	81	31	50	91	59	32	37	19	18	121	61	60	99	40	59	95	34	61	20	10	10
chr10	66680509	0.000100889	0.00988819			Intergenic							19	18	1	102	69	33	51	29	22	78	60	18	50	18	32	89	51	38	97	48	49	80	48	32	21	7	14
chr10	66680510	1.92447e-06	0.00034849			Intergenic							26	23	3	109	79	30	81	42	39	91	69	22	37	23	14	121	72	49	99	42	57	95	51	44	20	9	11
chr10	66680519	6.60483e-10	2.34368e-07			Intergenic							26	26	0	109	83	26	81	41	40	91	69	22	37	24	13	121	71	50	99	42	57	95	44	51	20	10	10
chr10	66680531	4.73704e-06	0.000766829			Intergenic							25	24	1	109	76	33	88	41	47	91	66	25	37	20	17	126	71	55	99	36	63	96	48	48	19	12	7
chr10	66758063	1.00698e-22	1.63756e-19			Intergenic							14	0	14	88	37	51	12	12	0	76	40	36	49	48	1	29	11	18	55	53	2	44	43	1	19	19	0
chr10	66759434	4.60074e-19	5.1286e-16			Intergenic							13	0	13	123	59	64	20	20	0	62	39	23	35	35	0	55	30	25	66	63	3	52	50	2	13	13	0
chr10	66759465	5.73696e-18	5.5889e-15			Intergenic							13	0	13	123	56	67	20	18	2	62	42	20	35	32	3	55	29	26	66	62	4	52	48	4	13	13	0
chr10	66763949	2.56546e-09	8.27896e-07			Intergenic			66762223	66767794			21	0	21	72	29	43	47	38	9	91	32	59	22	16	6	94	43	51	77	61	16	68	48	20	18	14	4
chr10	66763950	2.05671e-09	6.75457e-07			Intergenic			66762223	66767794			15	0	15	88	34	54	33	21	12	69	22	47	36	31	5	63	22	41	58	38	20	59	47	12	11	9	2
chr10	66764088	3.59082e-10	1.32477e-07			Intergenic			66762223	66767794			15	0	15	60	29	31	35	33	2	73	29	44	33	28	5	56	26	30	66	55	11	53	47	6	17	15	2
chr10	66764089	2.29217e-12	1.17639e-09			Intergenic			66762223	66767794			17	0	17	69	33	36	34	30	4	106	48	58	23	19	4	74	29	45	73	65	8	54	47	7	16	16	0
chr10	66765160	8.97615e-05	0.00900904			Intergenic			66762223	66767794			35	13	22	207	88	119	17	2	15	129	48	81	49	25	24	117	31	86	132	16	116	82	36	46	37	6	31
chr10	66767516	1.46595e-06	0.000274365			Intergenic			66762223	66767794			41	20	21	116	52	64	27	7	20	86	34	52	43	11	32	116	27	89	69	21	48	63	11	52	25	5	20
chr10	66774104	9.11159e-22	1.34943e-18			Intergenic							22	1	21	130	64	66	59	59	0	94	40	54	46	43	3	77	44	33	93	90	3	97	91	6	15	13	2
chr10	66802469	4.30117e-05	0.00497882			Intergenic			66802319	66802876			12	0	12	79	14	65	28	5	23	51	7	44	36	10	26	61	7	54	77	20	57	58	31	27	12	2	10
chr10	66805402	6.42797e-24	1.17425e-20			Intergenic					66802877	66805474	18	17	1	72	46	26	26	0	26	44	21	23	31	0	31	79	44	35	70	0	70	69	0	69	18	0	18
chr10	66805403	9.80888e-32	3.537e-28			Intergenic					66802877	66805474	32	30	2	123	67	56	31	0	31	72	38	34	22	0	22	99	51	48	93	0	93	76	0	76	33	0	33
chr10	66805868	1.95356e-20	2.54483e-17			Intergenic					66805806	66807805	17	1	16	96	46	50	30	28	2	83	41	42	35	31	4	62	35	27	87	85	2	65	59	6	30	28	2
chr10	66816251	6.91664e-07	0.000140575			Intergenic					66815395	66817394	10	10	0	106	106	0	33	33	0	62	59	3	42	42	0	49	47	2	62	56	6	83	74	9	11	8	3
chr10	66826827	1.1157e-20	1.49245e-17			Intergenic					66826577	66828576	15	0	15	164	81	83	67	63	4	113	43	70	61	53	8	71	39	32	128	121	7	106	93	13	14	12	2
chr10	66834418	5.92385e-09	1.81158e-06			Intergenic							11	6	5	124	37	87	32	27	5	78	44	34	72	23	49	69	53	16	103	77	26	59	32	27	17	15	2
chr10	66835985	6.67832e-06	0.00103283			Intergenic							34	14	20	167	117	50	99	44	55	144	60	84	73	39	34	163	60	103	175	77	98	154	57	97	32	16	16
chr10	66847402	2.31784e-05	0.00298267			Intergenic			66847141	66847728			18	3	15	116	43	73	10	5	5	125	45	80	39	15	24	84	22	62	35	23	12	54	43	11	10	3	7
chr10	66883957	3.05567e-10	1.14293e-07			Intergenic					66883413	66885412	13	5	8	113	15	98	63	34	29	60	15	45	55	24	31	90	56	34	109	54	55	109	54	55	11	10	1
chr10	66898774	6.03396e-19	6.58466e-16			Intergenic			66898584	66899258			28	0	28	125	48	77	56	47	9	113	59	54	35	33	2	100	49	51	127	104	23	82	71	11	25	19	6
chr10	66936251	3.95454e-06	0.000654901			Intergenic					66935823	66936468	16	0	16	72	39	33	15	0	15	50	23	27	34	0	34	71	32	39	67	0	67	60	0	60	19	10	9
chr10	66957460	9.48504e-10	3.27963e-07			Intergenic			66957093	66957531			23	0	23	80	32	48	32	0	32	100	45	55	45	0	45	61	21	40	98	0	98	51	0	51	22	0	22
chr10	66957461	1.94473e-18	2.00608e-15			Intergenic			66957093	66957531			20	1	19	104	59	45	24	0	24	77	35	42	34	0	34	61	21	40	111	2	109	57	2	55	24	0	24
chr10	66964435	3.91022e-05	0.00459737			Intergenic			66964326	66964979			18	17	1	144	117	27	40	38	2	87	80	7	39	36	3	86	75	11	80	80	0	55	54	1	10	10	0
chr10	66964947	1.20801e-13	7.23899e-11			Intergenic			66964326	66964979			26	0	26	107	59	48	39	0	39	113	47	66	31	0	31	77	35	42	110	0	110	58	0	58	16	0	16
chr10	66965159	1.14568e-05	0.00164354			Intergenic					66964980	66966087	16	0	16	114	50	64	13	0	13	92	22	70	29	2	27	64	32	32	62	4	58	53	3	50	18	1	17
chr10	66965216	5.49838e-09	1.69103e-06			Intergenic					66964980	66966087	16	0	16	73	38	35	13	0	13	68	34	34	29	0	29	36	11	25	62	0	62	53	0	53	18	7	11
chr10	66965233	2.98172e-07	6.54443e-05			Intergenic					66964980	66966087	16	0	16	73	34	39	13	0	13	68	32	36	29	0	29	36	12	24	62	0	62	53	0	53	18	7	11
chr10	66967909	2.29397e-05	0.00295731			Intergenic			66967466	66968648			16	1	15	100	36	64	45	3	42	69	21	48	45	2	43	66	19	47	71	4	67	80	6	74	26	3	23
chr10	66967910	1.09364e-05	0.00157962			Intergenic			66967466	66968648			13	9	4	62	23	39	23	14	9	57	31	26	35	26	9	54	35	19	77	53	24	60	48	12	13	9	4
chr10	66969688	2.13051e-13	1.23633e-10			Intergenic			66969561	66969765			12	0	12	141	66	75	12	0	12	68	31	37	50	0	50	25	9	16	76	0	76	84	2	82	14	8	6
chr10	66969689	4.57145e-05	0.00523479			Intergenic			66969561	66969765			13	0	13	106	45	61	11	0	11	76	32	44	33	0	33	24	13	11	66	2	64	41	1	40	10	7	3
chr10	66972890	1.23676e-10	4.93293e-08			Intergenic			66972822	66974105			17	0	17	118	60	58	11	0	11	71	30	41	41	0	41	35	26	9	59	2	57	71	4	67	15	0	15
chr10	66972891	3.7611e-15	2.68289e-12			Intergenic			66972822	66974105			26	0	26	136	68	68	37	0	37	93	38	55	34	0	34	59	22	37	76	0	76	89	3	86	23	0	23
chr10	66972959	2.02785e-07	4.61785e-05			Intergenic			66972822	66974105			26	0	26	135	127	8	37	34	3	93	81	12	34	28	6	59	55	4	76	71	5	89	83	6	23	22	1
chr10	66977810	2.25659e-05	0.00291879			Intergenic					66977110	66978313	17	1	16	71	14	57	30	2	28	52	16	36	35	0	35	41	7	34	89	1	88	85	1	84	10	1	9
chr10	66981201	1.06902e-05	0.00154875			Intergenic							18	17	1	156	98	58	43	39	4	111	68	43	46	38	8	83	72	11	105	99	6	64	57	7	32	20	12
chr10	67001263	7.72401e-05	0.00800017			Intergenic			67001053	67001275			39	14	25	156	38	118	127	38	89	141	38	103	88	28	60	143	58	85	187	65	122	134	67	67	37	12	25
chr10	67001313	2.71065e-05	0.00338904			Intergenic					67001276	67001446	17	4	13	39	4	35	61	28	33	34	6	28	28	1	27	72	17	55	67	4	63	63	4	59	12	0	12
chr10	67015230	2.88015e-08	7.74951e-06			Intergenic			67012544	67021381			22	5	17	163	105	58	32	10	22	102	66	36	75	34	41	88	24	64	114	39	75	87	24	63	30	14	16
chr10	67024605	1.31265e-05	0.00184269			Intergenic					67024519	67026518	17	0	17	48	21	27	44	0	44	54	19	35	21	0	21	76	28	48	101	0	101	47	0	47	12	0	12
chr10	67042452	1.45852e-05	0.00201451			Intergenic			67042332	67043097			28	18	10	105	101	4	90	54	36	80	65	15	37	34	3	145	81	64	132	92	40	106	63	43	16	12	4
chr10	67047959	8.08338e-07	0.000161414			Intergenic					67046078	67049821	13	0	13	87	36	51	34	0	34	52	24	28	25	0	25	50	16	34	68	0	68	49	5	44	13	0	13
chr10	67047960	3.43201e-07	7.43503e-05			Intergenic					67046078	67049821	13	0	13	49	24	25	13	0	13	64	26	38	29	0	29	66	34	32	65	0	65	63	2	61	12	0	12
chr10	67129889	7.30802e-06	0.00111758			Intergenic			67129757	67130002			20	12	8	91	23	68	20	14	6	71	31	40	40	3	37	58	34	24	92	57	35	83	45	38	18	14	4
chr10	67135897	8.45465e-05	0.00857908			Intergenic							16	7	9	129	40	89	33	18	15	51	3	48	73	32	41	43	18	25	84	28	56	92	60	32	18	9	9
chr10	67165918	9.7449e-05	0.00962761			Intergenic					67165835	67167834	25	23	2	51	47	4	58	53	5	76	65	11	35	28	7	93	82	11	83	64	19	87	69	18	25	15	10
chr10	67211844	4.25862e-06	0.000698471			Intergenic							22	5	17	88	11	77	24	21	3	81	21	60	40	5	35	18	11	7	106	43	63	63	39	24	20	5	15
chr10	67218945	3.41074e-06	0.000577479			Intergenic					67217478	67219477	11	11	0	42	41	1	32	31	1	41	39	2	34	30	4	63	56	7	71	59	12	36	24	12	14	12	2
chr10	67532627	8.2816e-11	3.39127e-08			Intergenic							22	2	20	139	54	85	36	1	35	135	66	69	62	0	62	70	15	55	125	9	116	92	4	88	19	6	13
chr10	67671922	2.61769e-05	0.00329542			Intergenic			67671540	67672275			38	6	32	209	85	124	59	10	49	133	38	95	68	20	48	145	17	128	137	34	103	153	34	119	40	4	36
chr10	67693651	1.12292e-05	0.00161554			Intergenic							14	4	10	80	19	61	57	39	18	65	25	40	63	32	31	92	57	35	131	71	60	107	63	44	15	10	5
chr10	67693652	2.53422e-05	0.00321038			Intergenic							29	10	19	146	117	29	81	41	40	138	87	51	71	46	25	109	59	50	163	78	85	142	76	66	32	13	19
chr10	67736484	3.43386e-10	1.27025e-07			Intergenic			67735763	67737924			13	2	11	183	78	105	34	0	34	59	47	12	47	3	44	85	35	50	100	29	71	98	1	97	23	0	23
chr10	67839155	8.24992e-05	0.00842147			Intergenic			67838490	67839257			21	14	7	107	73	34	60	50	10	78	57	21	36	23	13	103	80	23	108	40	68	81	54	27	33	15	18
chr10	67839166	6.12008e-05	0.0066514			Intergenic			67838490	67839257			21	14	7	107	92	15	60	48	12	78	64	14	35	29	6	103	88	15	108	57	51	81	61	20	33	19	14
chr10	67839189	5.40203e-05	0.00599123			Intergenic			67838490	67839257			21	17	4	107	92	15	60	44	16	78	65	13	36	29	7	103	86	17	108	57	51	81	63	18	33	19	14
chr10	67839192	1.53012e-05	0.00209811			Intergenic			67838490	67839257			21	15	6	107	88	19	60	50	10	78	62	16	36	23	13	103	84	19	108	54	54	81	60	21	33	17	16
chr10	67841629	1.3332e-06	0.000252061			Intergenic							16	14	2	124	91	33	21	9	12	78	60	18	75	28	47	54	25	29	76	44	32	76	28	48	23	16	7
chr10	67908671	1.48336e-06	0.000276665			Intergenic			67908623	67909280			13	5	8	128	10	118	32	29	3	82	14	68	28	2	26	67	47	20	62	28	34	53	22	31	14	2	12
chr10	68075509	1.77669e-09	5.89564e-07			Intergenic					68074690	68075857	15	0	15	88	43	45	15	0	15	71	60	11	20	0	20	36	9	27	54	17	37	66	1	65	13	0	13
chr10	68078238	5.26791e-05	0.00586811			Intergenic			68078029	68078691			26	24	2	115	107	8	37	33	4	45	30	15	28	25	3	99	93	6	82	38	44	44	40	4	11	10	1
chr10	68177985	1.54736e-06	0.000286969			Intergenic			68177534	68177998			16	2	14	82	17	65	44	5	39	91	8	83	36	0	36	85	6	79	99	6	93	71	0	71	26	0	26
chr10	68181732	7.65552e-06	0.00116155			Intergenic					68181731	68183514	10	1	9	92	5	87	56	14	42	95	21	74	33	2	31	78	22	56	82	18	64	90	35	55	15	3	12
chr10	68207307	9.257e-06	0.00136919			Intergenic					68206285	68209849	11	0	11	61	25	36	31	0	31	76	68	8	25	0	25	70	22	48	65	24	41	52	0	52	17	0	17
chr10	68249136	1.16906e-08	3.3909e-06			Intergenic			68248941	68249319			16	4	12	192	104	88	40	9	31	94	72	22	77	43	34	96	14	82	65	32	33	70	14	56	26	3	23
chr10	68261577	2.83303e-11	1.23664e-08			Intergenic			68261341	68261752			10	0	10	120	60	60	22	0	22	90	84	6	38	0	38	56	26	30	69	32	37	96	0	96	10	0	10
chr10	68269410	6.25076e-05	0.00677017			Intergenic			68269330	68270135			21	12	9	139	27	112	65	46	19	101	33	68	37	0	37	149	103	46	135	64	71	99	44	55	15	8	7
chr10	68287039	1.12648e-06	0.0002168			Intergenic			68287007	68287285			15	0	15	82	23	59	45	0	45	56	19	37	45	0	45	55	24	31	103	0	103	91	0	91	23	0	23
chr10	68375462	1.79171e-06	0.000327259			Intergenic					68374049	68375654	13	0	13	104	32	72	26	0	26	107	69	38	47	1	46	59	15	44	98	27	71	86	1	85	21	0	21
chr10	68383575	5.76985e-05	0.00633702			Intergenic			68383235	68383630			21	3	18	125	24	101	49	4	45	78	22	56	33	5	28	100	21	79	89	17	72	102	51	51	19	3	16
chr10	68401232	4.82763e-06	0.000779668			Intergenic					68399864	68401863	15	2	13	100	10	90	66	11	55	85	6	79	76	19	57	92	8	84	114	19	95	111	44	67	16	3	13
chr10	68463153	2.45534e-05	0.00312838			Intergenic							25	12	13	104	29	75	12	9	3	96	34	62	31	4	27	50	38	12	84	44	40	65	38	27	26	13	13
chr10	68503937	1.01628e-05	0.00148236	NM_001244454	WDR37	Intron	68502498	68505729			68502392	68505286	23	9	14	132	99	33	90	38	52	112	59	53	65	38	27	132	50	82	146	68	78	121	47	74	30	15	15
chr10	68503938	7.91405e-05	0.00814883	NM_001244454	WDR37	Intron	68502498	68505729			68502392	68505286	27	14	13	133	21	112	68	25	43	93	34	59	64	23	41	116	52	64	135	62	73	168	69	99	33	14	19
chr10	68505711	1.27657e-07	3.03363e-05	NM_001244454	WDR37	Intron	68502498	68505729	68505287	68505776			14	0	14	82	35	47	29	0	29	104	93	11	34	0	34	81	33	48	126	59	67	83	1	82	33	0	33
chr10	68505712	2.56364e-13	1.47243e-10	NM_001244454	WDR37	Intron	68502498	68505729	68505287	68505776			17	0	17	86	59	27	20	0	20	101	90	11	43	0	43	82	41	41	79	41	38	92	3	89	17	0	17
chr10	68509596	1.82172e-07	4.19686e-05	NM_001244454	WDR37	Intron	68509477	68509748			68507367	68509627	31	4	27	178	78	100	18	5	13	106	31	75	80	39	41	58	7	51	122	22	100	73	11	62	27	3	24
chr10	68552412	2.52947e-06	0.000444396			Intergenic			68550474	68553286			13	0	13	82	8	74	24	15	9	75	6	69	42	1	41	51	29	22	77	18	59	74	35	39	15	1	14
chr10	68605409	9.83118e-05	0.00968868			Intergenic							23	15	8	98	75	23	37	32	5	103	75	28	77	56	21	69	43	26	167	109	58	111	59	52	35	22	13
chr10	68703555	4.48639e-08	1.16714e-05			Intergenic			68702960	68704962			19	16	3	80	72	8	25	16	9	67	57	10	35	21	14	60	50	10	131	76	55	67	37	30	23	15	8
chr10	68703565	2.95002e-09	9.41981e-07			Intergenic			68702960	68704962			17	17	0	75	71	4	22	17	5	59	56	3	27	21	6	52	50	2	109	75	34	57	35	22	21	16	5
chr10	68703589	4.57585e-07	9.67464e-05			Intergenic			68702960	68704962			17	15	2	75	71	4	22	16	6	59	55	4	27	24	3	52	49	3	109	78	31	57	36	21	22	16	6
chr10	68703597	7.7345e-05	0.00800636			Intergenic			68702960	68704962			17	13	4	75	73	2	22	17	5	59	58	1	27	23	4	52	48	4	109	83	26	57	41	16	22	18	4
chr10	68705342	3.14967e-05	0.00383773			Intergenic					68704963	68707065	15	11	4	65	25	40	27	22	5	65	32	33	38	2	36	66	60	6	43	26	17	65	53	12	18	11	7
chr10	68720289	5.02685e-06	0.000808796			Intergenic			68718267	68720810			28	2	26	201	18	183	88	4	84	147	7	140	84	2	82	151	19	132	199	27	172	152	40	112	40	1	39
chr10	68720290	6.33201e-05	0.0068397			Intergenic			68718267	68720810			30	1	29	147	6	141	58	2	56	135	16	119	83	4	79	99	8	91	144	18	126	129	24	105	24	2	22
chr10	68720305	2.65085e-05	0.0033284			Intergenic			68718267	68720810			15	5	10	111	24	87	43	11	32	64	17	47	44	6	38	71	14	57	103	27	76	96	58	38	19	6	13
chr10	68720318	4.12239e-08	1.07899e-05			Intergenic			68718267	68720810			15	2	13	111	16	95	43	3	40	64	10	54	44	5	39	71	11	60	103	23	80	96	49	47	19	3	16
chr10	68824363	2.37952e-07	5.33855e-05			Intergenic			68823318	68824650			15	0	15	98	50	48	16	0	16	79	76	3	39	0	39	66	29	37	73	34	39	58	1	57	19	0	19
chr10	69052986	1.6321e-15	1.21218e-12			Intergenic					69050648	69053916	10	10	0	66	16	50	69	65	4	67	23	44	31	31	0	67	34	33	110	105	5	66	61	5	16	16	0
chr10	69144997	8.06678e-06	0.00121509			Intergenic			69144860	69145254			26	16	10	121	90	31	84	33	51	90	52	38	26	24	2	128	52	76	113	43	70	91	45	46	27	12	15
chr10	69294205	9.56934e-05	0.00949336			Intergenic			69293841	69295333			31	6	25	111	14	97	68	2	66	86	4	82	47	2	45	122	7	115	138	2	136	88	4	84	21	0	21
chr11	30172	1.31149e-06	0.000248412			Intergenic							15	0	15	32	11	21	17	0	17	25	0	25	15	0	15	64	0	64	71	0	71	71	0	71	11	1	10
chr11	413084	4.46258e-12	2.19e-09			Intergenic			412745	413096			20	6	14	80	19	61	38	28	10	88	45	43	29	1	28	96	80	16	100	78	22	62	38	24	19	12	7
chr11	431964	7.18372e-05	0.00756015			Intergenic			431345	431967			20	0	20	67	0	67	56	0	56	75	0	75	34	0	34	101	0	101	91	0	91	70	2	68	17	2	15
chr11	733306	1.75219e-06	0.0003207			Intergenic			733258	733753			23	10	13	213	98	115	25	4	21	144	62	82	107	50	57	100	18	82	160	39	121	127	39	88	28	7	21
chr11	750975	3.09807e-05	0.00378859			Intergenic			750318	752006			21	3	18	86	0	86	23	0	23	41	0	41	18	0	18	78	0	78	47	0	47	28	0	28	11	0	11
chr11	791330	2.34041e-07	5.2641e-05			Intergenic					791094	793093	13	13	0	93	85	8	32	31	1	59	48	11	41	35	6	50	45	5	73	51	22	55	35	20	12	9	3
chr11	791358	8.73556e-05	0.00881452			Intergenic					791094	793093	14	14	0	93	86	7	34	27	7	59	53	6	41	38	3	50	49	1	74	48	26	56	43	13	12	10	2
chr11	791494	5.70489e-05	0.00627675			Intergenic					791094	793093	13	1	12	104	20	84	70	6	64	102	7	95	42	7	35	105	3	102	113	6	107	75	2	73	21	1	20
chr11	794439	3.43586e-10	1.27062e-07			Intergenic			793094	794813			14	0	14	100	0	100	40	0	40	64	28	36	28	6	22	50	11	39	61	15	46	57	27	30	12	1	11
chr11	834228	1.37239e-05	0.0019136			Intergenic					832868	836713	18	3	15	112	59	53	21	12	9	80	21	59	45	17	28	40	2	38	116	38	78	40	1	39	22	8	14
chr11	842006	1.52941e-14	1.01259e-11			Intergenic			841639	842690			10	9	1	71	64	7	42	38	4	102	62	40	59	43	16	139	75	64	130	82	48	159	60	99	14	12	2
chr11	846784	1.6603e-08	4.67726e-06	NM_213881	CRYL1	Intron	846757	852540			844918	846917	31	19	12	171	102	69	60	40	20	90	47	43	68	25	43	50	3	47	108	55	53	55	2	53	27	19	8
chr11	846785	3.26884e-12	1.64041e-09	NM_213881	CRYL1	Intron	846757	852540			844918	846917	26	10	16	197	105	92	83	38	45	97	62	35	53	38	15	52	48	4	97	73	24	67	65	2	34	17	17
chr11	847481	1.93347e-20	2.5213e-17	NM_213881	CRYL1	Intron	846757	852540	846918	847549			28	0	28	86	0	86	52	0	52	82	26	56	27	12	15	127	93	34	84	21	63	60	40	20	22	0	22
chr11	847501	3.99367e-13	2.2481e-10	NM_213881	CRYL1	Intron	846757	852540	846918	847549			29	21	8	92	48	44	38	27	11	75	32	43	40	8	32	96	30	66	81	15	66	54	0	54	19	14	5
chr11	847502	3.94371e-10	1.44809e-07	NM_213881	CRYL1	Intron	846757	852540	846918	847549			28	20	8	86	55	31	52	35	17	82	26	56	27	3	24	127	50	77	84	37	47	60	0	60	22	14	8
chr11	853589	2.49429e-05	0.00316988	NM_213881	CRYL1	Intron	852647	864718			852845	855267	14	11	3	67	61	6	32	20	12	76	45	31	24	20	4	104	59	45	98	60	38	86	40	46	17	15	2
chr11	861443	1.71155e-05	0.00230462	NM_213881	CRYL1	Intron	852647	864718	861012	861462			30	0	30	112	1	111	67	2	65	72	14	58	29	3	26	10	6	4	77	6	71	30	12	18	20	0	20
chr11	864646	2.14792e-46	3.2989e-42	NM_213881	CRYL1	Intron	852647	864718	864552	864867			11	8	3	82	78	4	34	19	15	63	24	39	48	22	26	63	0	63	47	0	47	49	0	49	12	5	7
chr11	864647	2.84043e-43	3.07271e-39	NM_213881	CRYL1	Intron	852647	864718	864552	864867			10	2	8	92	82	10	34	20	14	71	23	48	46	21	25	69	1	68	58	0	58	59	0	59	10	4	6
chr11	912500	5.39828e-05	0.00598881	NM_213881	CRYL1	Intron	909097	921936	911556	912541			23	5	18	97	35	62	40	14	26	85	27	58	35	8	27	75	24	51	92	13	79	84	7	77	20	6	14
chr11	963657	2.89291e-07	6.37764e-05			Intergenic							20	16	4	96	85	11	41	27	14	93	81	12	44	25	19	102	61	41	110	74	36	106	57	49	22	18	4
chr11	994908	1.07702e-08	3.14448e-06			Intergenic			994681	995927			43	24	19	153	79	74	56	34	22	148	52	96	31	4	27	69	3	66	164	62	102	69	5	64	48	23	25
chr11	995683	1.50215e-05	0.00206605			Intergenic			994681	995927			14	12	2	128	104	24	42	27	15	72	56	16	53	32	21	78	65	13	84	53	31	80	39	41	20	13	7
chr11	996917	1.99203e-12	1.02786e-09			Intergenic			996554	998208			10	10	0	71	41	30	16	15	1	50	0	50	33	0	33	46	0	46	51	27	24	90	2	88	15	7	8
chr11	1017377	7.75722e-07	0.000155656			Intergenic			1017022	1017421			11	7	4	52	50	2	27	22	5	59	53	6	37	35	2	50	50	0	78	32	46	67	64	3	20	5	15
chr11	1056627	1.39398e-05	0.001937			Intergenic			1056441	1056771			12	12	0	71	71	0	22	20	2	54	51	3	33	30	3	40	36	4	88	79	9	66	51	15	11	10	1
chr11	1068139	3.07255e-22	4.802e-19			Intergenic			1067819	1068415			19	11	8	137	97	40	33	27	6	81	0	81	44	0	44	50	0	50	89	33	56	59	0	59	17	8	9
chr11	1074223	1.60186e-05	0.00217909			Intergenic			1073964	1074505			18	1	17	99	15	84	30	1	29	77	31	46	55	28	27	71	17	54	71	19	52	107	49	58	12	2	10
chr11	1082359	1.17431e-09	4.01895e-07			Intergenic			1082043	1082494			14	0	14	75	36	39	33	0	33	70	56	14	41	39	2	61	56	5	87	44	43	54	53	1	14	5	9
chr11	1082360	9.68825e-07	0.000189536			Intergenic			1082043	1082494			12	0	12	63	26	37	43	0	43	31	27	4	28	27	1	39	38	1	60	16	44	41	35	6	12	5	7
chr11	1121746	2.51423e-05	0.00319001			Intergenic					1121704	1123703	15	9	6	184	107	77	76	33	43	164	66	98	73	23	50	172	92	80	121	30	91	148	60	88	34	10	24
chr11	1125466	4.20101e-06	0.000690389			Intergenic					1124982	1126981	20	12	8	89	39	50	32	21	11	108	65	43	73	31	42	115	85	30	95	65	30	88	67	21	18	13	5
chr11	1125467	4.24171e-05	0.00492108			Intergenic					1124982	1126981	36	1	35	111	47	64	50	5	45	162	50	112	69	20	49	119	8	111	147	21	126	133	21	112	25	5	20
chr11	1183159	5.24842e-05	0.00584954			Intergenic			1182825	1183526			28	7	21	110	61	49	18	1	17	111	58	53	66	29	37	33	12	21	92	22	70	63	21	42	31	5	26
chr11	1183160	8.27268e-05	0.00843773			Intergenic			1182825	1183526			24	16	8	166	97	69	27	23	4	157	110	47	85	49	36	42	41	1	117	81	36	83	72	11	29	22	7
chr11	1227347	9.48489e-09	2.79678e-06	NM_001177919	LATS2	Exon	1225526	1227522	1226988	1227589			17	16	1	117	107	10	49	37	12	65	56	9	32	32	0	99	75	24	124	84	40	100	62	38	17	14	3
chr11	1343938	2.12623e-12	1.09438e-09			Intergenic							13	0	13	34	17	17	32	1	31	47	0	47	32	1	31	50	0	50	71	0	71	68	0	68	13	0	13
chr11	1343939	3.03299e-35	1.49137e-31			Intergenic							11	0	11	64	47	17	33	0	33	56	0	56	36	0	36	78	0	78	86	0	86	58	0	58	16	0	16
chr11	1346323	2.12312e-06	0.000380091			Intergenic							21	3	18	105	30	75	23	0	23	60	6	54	45	2	43	56	7	49	72	3	69	64	4	60	15	0	15
chr11	1377201	1.8286e-21	2.62989e-18			Intergenic							10	0	10	75	37	38	52	2	50	45	4	41	37	0	37	90	1	89	75	1	74	63	0	63	21	0	21
chr11	1428117	3.31309e-06	0.000562373			Intergenic			1427923	1428259			22	6	16	131	57	74	40	6	34	86	28	58	80	34	46	100	9	91	106	17	89	82	20	62	17	2	15
chr11	1428161	4.70646e-23	8.00384e-20			Intergenic			1427923	1428259			20	0	20	106	59	47	43	0	43	88	0	88	65	34	31	99	0	99	103	0	103	92	0	92	22	0	22
chr11	1428162	2.17507e-14	1.42116e-11			Intergenic			1427923	1428259			16	0	16	79	33	46	37	0	37	60	0	60	46	15	31	92	0	92	93	0	93	65	0	65	15	0	15
chr11	1571076	6.6973e-05	0.00715047	NM_213801	FGF9	Intron	1564396	1581648			1569777	1571776	10	9	1	99	90	9	10	4	6	58	34	24	26	19	7	15	12	3	52	44	8	46	17	29	14	11	3
chr11	1571083	1.52615e-06	0.000283541	NM_213801	FGF9	Intron	1564396	1581648			1569777	1571776	10	10	0	99	91	8	10	5	5	58	28	30	26	22	4	15	13	2	52	44	8	46	15	31	14	9	5
chr11	1571115	2.21788e-05	0.00287774	NM_213801	FGF9	Intron	1564396	1581648			1569777	1571776	10	9	1	99	91	8	10	4	6	58	37	21	26	21	5	15	13	2	52	43	9	46	15	31	14	13	1
chr11	1627408	5.73813e-05	0.00630775			Intergenic			1627164	1628268			14	7	7	80	52	28	30	12	18	54	36	18	23	7	16	79	26	53	69	16	53	50	28	22	17	5	12
chr11	1627417	5.85684e-05	0.00641557			Intergenic			1627164	1628268			14	4	10	80	51	29	30	10	20	54	39	15	23	8	15	79	22	57	69	15	54	50	26	24	17	4	13
chr11	1696659	3.08574e-12	1.5548e-09			Intergenic			1696146	1696925			21	0	21	119	60	59	51	0	51	83	38	45	40	31	9	111	93	18	111	51	60	90	82	8	17	0	17
chr11	1696680	2.4841e-15	1.81038e-12			Intergenic			1696146	1696925			21	1	20	119	60	59	51	0	51	82	38	44	40	37	3	111	102	9	111	57	54	90	85	5	17	0	17
chr11	1699077	6.27572e-13	3.44844e-10			Intergenic			1698773	1699143			10	5	5	123	71	52	41	24	17	59	36	23	36	34	2	35	35	0	53	48	5	45	42	3	12	9	3
chr11	1708210	3.82697e-12	1.89829e-09			Intergenic					1707255	1708348	21	2	19	136	9	127	53	6	47	121	47	74	52	18	34	86	36	50	115	25	90	140	69	71	16	5	11
chr11	1760543	5.06455e-06	0.000813958			Intergenic					1759920	1763224	16	12	4	111	91	20	41	30	11	128	91	37	45	30	15	120	73	47	125	86	39	117	64	53	28	15	13
chr11	1760544	1.91775e-07	4.39772e-05			Intergenic					1759920	1763224	13	1	12	95	32	63	28	7	21	84	27	57	50	16	34	91	49	42	113	49	64	114	71	43	27	12	15
chr11	1799474	5.18596e-06	0.000829996			Intergenic					1799140	1802507	19	19	0	120	85	35	25	21	4	72	39	33	49	44	5	64	58	6	84	76	8	67	61	6	14	14	0
chr11	1799506	3.58362e-05	0.00427069			Intergenic					1799140	1802507	28	18	10	131	92	39	68	24	44	83	45	38	77	41	36	137	61	76	151	70	81	142	58	84	30	15	15
chr11	1799570	1.96702e-09	6.48398e-07			Intergenic					1799140	1802507	19	7	12	82	11	71	62	36	26	63	9	54	62	21	41	107	66	41	116	56	60	124	64	60	19	15	4
chr11	1809391	7.98369e-05	0.00820424			Intergenic			1808895	1809709			12	11	1	85	82	3	26	10	16	71	67	4	35	33	2	69	35	34	78	52	26	57	46	11	10	8	2
chr11	1819603	9.8526e-05	0.00970274			Intergenic			1819310	1819683			13	5	8	139	129	10	29	16	13	81	33	48	43	16	27	62	33	29	76	37	39	55	53	2	14	0	14
chr11	1835225	2.13252e-06	0.000381663			Intergenic			1833003	1835749			14	10	4	123	109	14	51	18	33	56	46	10	44	27	17	86	43	43	111	58	53	128	78	50	18	9	9
chr11	1841268	5.05791e-06	0.000813163			Intergenic					1840431	1843637	17	16	1	138	126	12	24	19	5	81	73	8	53	47	6	89	69	20	103	80	23	107	80	27	15	10	5
chr11	1847592	1.60017e-05	0.00217737			Intergenic			1847188	1848800			20	13	7	62	50	12	26	14	12	52	41	11	43	22	21	73	39	34	111	54	57	83	41	42	26	14	12
chr11	1882189	1.95438e-18	2.01436e-15			Intergenic			1880559	1883247			11	8	3	105	54	51	20	10	10	62	55	7	31	29	2	45	39	6	78	75	3	66	62	4	10	10	0
chr11	1907851	3.76487e-06	0.000628511			Intergenic			1907483	1907986			22	9	13	105	18	87	60	30	30	93	39	54	51	20	31	81	45	36	109	50	59	120	62	58	19	11	8
chr11	1907852	7.62843e-05	0.00791833			Intergenic			1907483	1907986			28	10	18	133	86	47	90	28	62	91	47	44	67	34	33	96	25	71	166	64	102	134	48	86	30	11	19
chr11	2080357	7.17217e-05	0.00754864			Intergenic			2079972	2080510			10	1	9	66	13	53	32	4	28	49	34	15	35	5	30	75	27	48	77	26	51	43	32	11	12	3	9
chr11	2226139	1.58707e-10	6.21463e-08			Intergenic					2223494	2226792	14	4	10	112	57	55	24	10	14	74	23	51	31	13	18	39	21	18	69	66	3	65	55	10	13	4	9
chr11	2226186	8.14398e-12	3.86255e-09			Intergenic					2223494	2226792	14	4	10	112	48	64	24	10	14	76	31	45	31	13	18	39	20	19	70	59	11	65	58	7	13	4	9
chr11	2228835	8.67531e-06	0.00129639			Intergenic			2228643	2229014			21	0	21	103	27	76	47	13	34	99	23	76	48	8	40	68	8	60	69	26	43	48	32	16	20	8	12
chr11	2235389	9.48642e-06	0.00139679			Intergenic			2235263	2236850			10	0	10	64	0	64	28	0	28	38	0	38	42	0	42	60	0	60	49	0	49	85	1	84	13	3	10
chr11	2242067	8.94021e-06	0.00132991			Intergenic			2241711	2242536			15	3	12	93	70	23	39	19	20	54	37	17	43	19	24	77	34	43	82	25	57	96	43	53	11	5	6
chr11	2242374	7.79903e-05	0.00805975			Intergenic			2241711	2242536			19	4	15	161	84	77	52	25	27	96	60	36	69	32	37	128	48	80	142	28	114	122	56	66	13	3	10
chr11	2297980	3.94961e-06	0.000654171			Intergenic			2297858	2298665			29	3	26	132	39	93	49	6	43	78	9	69	25	2	23	104	3	101	102	8	94	85	13	72	36	0	36
chr11	2301156	3.91576e-06	0.000649516			Intergenic					2299229	2301228	34	14	20	109	27	82	71	27	44	97	42	55	74	39	35	87	25	62	171	86	85	135	75	60	27	16	11
chr11	2301222	3.27578e-05	0.00395959			Intergenic					2299229	2301228	15	2	13	26	3	23	29	17	12	45	7	38	48	1	47	24	4	20	105	11	94	81	3	78	16	0	16
chr11	2312372	1.99289e-11	8.95356e-09			Intergenic					2310875	2312874	11	1	10	113	46	67	35	4	31	54	23	31	27	15	12	54	45	9	82	49	33	73	62	11	13	1	12
chr11	2380274	2.59048e-05	0.0032681			Intergenic			2379113	2380546			17	8	9	107	97	10	20	14	6	101	84	17	53	40	13	40	21	19	98	55	43	70	52	18	22	13	9
chr11	2388734	5.39313e-06	0.000858515			Intergenic			2388636	2389102			26	13	13	122	108	14	22	16	6	89	63	26	66	38	28	74	42	32	129	68	61	113	73	40	19	10	9
chr11	2388735	8.34468e-07	0.000165992			Intergenic			2388636	2389102			22	11	11	138	32	106	22	6	16	83	30	53	59	22	37	45	20	25	138	58	80	115	59	56	22	16	6
chr11	2404271	1.97902e-10	7.6199e-08			Intergenic			2403850	2404785			13	12	1	35	35	0	28	25	3	57	39	18	30	18	12	34	26	8	60	40	20	37	3	34	11	11	0
chr11	2408113	6.35864e-05	0.00686217			Intergenic			2407437	2408909			14	7	7	105	86	19	42	23	19	104	73	31	44	41	3	123	66	57	96	58	38	99	57	42	20	8	12
chr11	2408114	5.23665e-08	1.34767e-05			Intergenic			2407437	2408909			24	9	15	142	17	125	49	34	15	80	29	51	32	7	25	105	71	34	142	67	75	93	40	53	23	12	11
chr11	2408453	1.2674e-18	1.33505e-15			Intergenic			2407437	2408909			24	0	24	76	1	75	12	0	12	93	50	43	36	36	0	49	21	28	85	36	49	53	51	2	11	0	11
chr11	2408454	7.79427e-21	1.05972e-17			Intergenic			2407437	2408909			11	0	11	86	5	81	13	0	13	77	36	41	25	25	0	75	32	43	98	57	41	68	66	2	20	0	20
chr11	2438874	1.35133e-22	2.16359e-19			Intergenic							18	15	3	49	46	3	34	28	6	75	24	51	47	11	36	66	26	40	84	23	61	90	3	87	14	13	1
chr11	2438890	1.41962e-11	6.50965e-09			Intergenic							10	0	10	68	0	68	37	0	37	111	46	65	60	27	33	89	36	53	138	54	84	158	80	78	14	0	14
chr11	2438895	1.40409e-10	5.55229e-08			Intergenic							10	0	10	69	3	66	38	2	36	113	52	61	61	31	30	91	39	52	141	66	75	160	84	76	14	0	14
chr11	2494485	9.05396e-14	5.50514e-11			Intergenic			2494385	2494667			33	12	21	189	87	102	49	19	30	98	25	73	56	3	53	70	20	50	99	7	92	73	5	68	28	10	18
chr11	2558958	1.35238e-25	2.83714e-22			Intergenic							11	11	0	91	91	0	18	17	1	41	17	24	40	19	21	26	16	10	49	23	26	49	0	49	11	11	0
chr11	2627072	1.70265e-16	1.40742e-13			Intergenic					2626515	2628514	35	17	18	110	60	50	59	59	0	98	54	44	40	38	2	126	116	10	162	159	3	85	83	2	29	12	17
chr11	2627073	3.75076e-13	2.12096e-10			Intergenic					2626515	2628514	27	15	12	95	46	49	72	69	3	89	31	58	37	36	1	99	95	4	123	117	6	87	85	2	37	16	21
chr11	2631768	4.39416e-05	0.00506712			Intergenic			2631489	2631937			14	11	3	133	109	24	47	21	26	77	62	15	39	27	12	68	42	26	79	44	35	62	32	30	10	8	2
chr11	2631774	1.09599e-06	0.000211225			Intergenic			2631489	2631937			14	11	3	133	98	35	47	18	29	77	56	21	39	19	20	68	34	34	79	35	44	62	27	35	10	5	5
chr11	2631780	7.05443e-07	0.000143095			Intergenic			2631489	2631937			14	10	4	133	112	21	47	22	25	77	60	17	39	20	19	68	36	32	79	48	31	62	28	34	10	7	3
chr11	2631800	3.81315e-05	0.00450025			Intergenic			2631489	2631937			14	13	1	133	105	28	47	21	26	77	58	19	39	26	13	69	39	30	80	47	33	62	32	30	10	6	4
chr11	2631815	8.79568e-05	0.00886295			Intergenic			2631489	2631937			14	9	5	133	99	34	49	15	34	77	54	23	39	25	14	69	33	36	80	37	43	62	32	30	10	3	7
chr11	2631823	1.88711e-06	0.000342721			Intergenic			2631489	2631937			14	12	2	133	93	40	49	20	29	77	61	16	39	20	19	69	36	33	79	36	43	62	25	37	10	5	5
chr11	2631828	3.40072e-07	7.37046e-05			Intergenic			2631489	2631937			14	13	1	133	115	18	49	21	28	77	62	15	39	25	14	69	38	31	79	46	33	62	33	29	10	7	3
chr11	2631840	7.0681e-05	0.00746373			Intergenic			2631489	2631937			14	11	3	133	111	22	49	20	29	77	58	19	38	22	16	69	43	26	79	45	34	62	33	29	10	7	3
chr11	2631850	1.36987e-05	0.00191073			Intergenic			2631489	2631937			14	12	2	133	116	17	49	25	24	77	56	21	38	25	13	69	43	26	79	43	36	62	38	24	10	8	2
chr11	2631865	2.73286e-06	0.000475163			Intergenic			2631489	2631937			14	12	2	130	103	27	48	28	20	77	62	15	38	24	14	69	42	27	79	34	45	62	36	26	10	8	2
chr11	2658199	3.07204e-19	3.51264e-16			Intergenic					2657769	2659768	18	0	18	75	30	45	30	0	30	68	59	9	27	13	14	105	102	3	79	47	32	76	74	2	17	7	10
chr11	2658200	4.9131e-14	3.08226e-11			Intergenic					2657769	2659768	17	0	17	91	41	50	32	0	32	65	52	13	16	7	9	93	84	9	72	38	34	52	51	1	18	9	9
chr11	2677797	1.79641e-06	0.000327974			Intergenic					2675938	2677937	36	29	7	104	100	4	22	20	2	70	62	8	52	31	21	59	49	10	105	77	28	70	43	27	24	21	3
chr11	2685013	2.1242e-11	9.49892e-09			Intergenic			2683894	2685672			13	13	0	90	87	3	25	22	3	147	86	61	77	38	39	177	110	67	114	51	63	152	80	72	17	15	2
chr11	2696361	2.36813e-13	1.36771e-10			Intergenic			2695360	2697261			18	7	11	138	67	71	15	6	9	90	26	64	26	2	24	53	15	38	60	2	58	59	3	56	15	5	10
chr11	2696974	1.02765e-35	5.34912e-32			Intergenic			2695360	2697261			22	11	11	92	89	3	47	20	27	73	38	35	26	0	26	83	37	46	84	1	83	78	1	77	22	12	10
chr11	2696975	1.73926e-33	7.35956e-30			Intergenic			2695360	2697261			23	8	15	94	90	4	42	20	22	74	42	32	40	0	40	81	36	45	85	0	85	70	4	66	22	10	12
chr11	2697024	1.21024e-10	4.83493e-08			Intergenic			2695360	2697261			32	12	20	180	97	83	69	21	48	107	42	65	26	2	24	130	54	76	84	7	77	78	6	72	36	15	21
chr11	2697025	5.82107e-09	1.78278e-06			Intergenic			2695360	2697261			37	24	13	187	107	80	66	45	21	107	73	34	39	38	1	127	81	46	86	82	4	72	69	3	38	24	14
chr11	2701337	1.57991e-24	3.04254e-21			Intergenic			2701015	2701717			15	8	7	55	53	2	34	12	22	62	24	38	19	0	19	58	17	41	48	0	48	46	0	46	15	6	9
chr11	2701338	1.37425e-33	5.83492e-30			Intergenic			2701015	2701717			19	7	12	86	83	3	47	25	22	64	40	24	34	0	34	64	28	36	79	0	79	62	0	62	19	12	7
chr11	2701373	8.20731e-08	2.03068e-05			Intergenic			2701015	2701717			20	17	3	135	86	49	56	48	8	76	61	15	34	31	3	75	64	11	78	72	6	63	58	5	19	17	2
chr11	2703726	3.31336e-38	2.1581e-34			Intergenic			2703244	2705825			17	9	8	112	20	92	46	18	28	86	49	37	51	51	0	79	45	34	112	106	6	95	94	1	20	9	11
chr11	2704220	6.34941e-06	0.000989098			Intergenic			2703244	2705825			27	23	4	141	84	57	21	16	5	51	35	16	31	18	13	72	46	26	74	68	6	38	37	1	23	20	3
chr11	2704221	1.46041e-13	8.64739e-11			Intergenic			2703244	2705825			29	18	11	176	105	71	18	14	4	87	53	34	47	23	24	60	26	34	47	2	45	53	5	48	22	12	10
chr11	2706517	3.67211e-42	3.59705e-38			Intergenic					2705826	2707237	25	10	15	116	108	8	48	21	27	110	51	59	49	0	49	84	39	45	102	2	100	78	0	78	21	9	12
chr11	2706529	8.58675e-41	7.12152e-37			Intergenic					2705826	2707237	25	10	15	116	106	10	48	21	27	110	48	62	49	0	49	84	38	46	102	1	101	78	2	76	21	8	13
chr11	2721506	1.3892e-31	4.95193e-28			Intergenic			2721164	2721573			30	15	15	127	122	5	85	38	47	117	50	67	35	21	14	127	72	55	115	2	113	104	4	100	46	30	16
chr11	2730767	3.09967e-06	0.000532025			Intergenic			2730228	2731088			15	8	7	103	68	35	35	17	18	58	52	6	31	24	7	73	66	7	80	62	18	55	51	4	11	8	3
chr11	2730789	2.69255e-05	0.00337021			Intergenic			2730228	2731088			15	7	8	104	62	42	35	16	19	58	40	18	31	23	8	73	62	11	80	58	22	56	47	9	11	6	5
chr11	2730815	1.17843e-06	0.00022568			Intergenic			2730228	2731088			15	8	7	104	68	36	36	14	22	58	52	6	31	23	8	73	64	9	79	59	20	56	52	4	11	9	2
chr11	2730821	7.57534e-06	0.00115208			Intergenic			2730228	2731088			15	8	7	104	69	35	36	20	16	58	54	4	31	26	5	73	65	8	80	59	21	56	52	4	11	10	1
chr11	2730834	2.19397e-06	0.000391424			Intergenic			2730228	2731088			15	8	7	103	71	32	36	18	18	58	49	9	31	24	7	73	66	7	80	62	18	56	53	3	10	8	2
chr11	2730851	8.8716e-07	0.00017519			Intergenic			2730228	2731088			15	8	7	103	70	33	36	23	13	58	53	5	31	24	7	73	65	8	80	62	18	56	55	1	11	10	1
chr11	2730854	9.89661e-06	0.00144743			Intergenic			2730228	2731088			15	7	8	103	71	32	36	16	20	58	49	9	31	24	7	73	66	7	80	62	18	56	49	7	11	9	2
chr11	2733925	3.57355e-22	5.54321e-19			Intergenic			2733910	2734315			17	16	1	97	91	6	22	22	0	65	49	16	30	18	12	76	48	28	23	0	23	38	3	35	16	16	0
chr11	2733931	4.20469e-19	4.71245e-16			Intergenic			2733910	2734315			17	15	2	98	92	6	22	18	4	65	46	19	30	18	12	76	48	28	23	0	23	38	3	35	16	16	0
chr11	2733965	1.04049e-24	2.03524e-21			Intergenic			2733910	2734315			17	16	1	98	93	5	22	20	2	65	49	16	30	18	12	76	44	32	22	0	22	38	3	35	16	14	2
chr11	2736457	1.58987e-07	3.7122e-05			Intergenic			2736256	2737575			10	7	3	87	62	25	14	4	10	57	33	24	40	22	18	22	9	13	34	14	20	34	6	28	10	4	6
chr11	2737261	1.71287e-32	6.63826e-29			Intergenic			2736256	2737575			15	5	10	89	83	6	50	21	29	105	56	49	35	12	23	84	39	45	88	0	88	51	0	51	19	7	12
chr11	2737302	3.87695e-31	1.31062e-27			Intergenic			2736256	2737575			18	10	8	82	77	5	41	25	16	65	34	31	38	17	21	73	39	34	83	0	83	67	3	64	26	14	12
chr11	2737303	3.81698e-29	1.05522e-25			Intergenic			2736256	2737575			24	9	15	83	79	4	70	23	47	89	47	42	44	22	22	110	52	58	109	0	109	91	2	89	22	13	9
chr11	2737364	2.72015e-14	1.75974e-11			Intergenic			2736256	2737575			27	10	17	174	101	73	61	22	39	84	19	65	60	21	39	104	34	70	83	3	80	69	12	57	32	9	23
chr11	2737486	4.38555e-15	3.09989e-12			Intergenic			2736256	2737575			26	17	9	167	96	71	93	71	22	130	108	22	61	37	24	154	122	32	95	92	3	108	106	2	34	26	8
chr11	2737543	3.58174e-36	1.94578e-32			Intergenic			2736256	2737575			17	9	8	88	80	8	77	37	40	114	54	60	38	15	23	123	68	55	95	0	95	108	1	107	29	12	17
chr11	2737544	5.36715e-22	8.17255e-19			Intergenic			2736256	2737575			18	10	8	72	68	4	49	32	17	56	34	22	47	20	27	83	60	23	46	0	46	53	0	53	18	11	7
chr11	2741812	2.01231e-32	7.77454e-29			Intergenic			2741497	2741986			23	14	9	98	97	1	31	9	22	57	25	32	24	11	13	36	18	18	72	0	72	40	0	40	24	11	13
chr11	2742216	1.31597e-05	0.00184651			Intergenic					2741987	2744700	10	5	5	126	70	56	19	5	14	55	35	20	52	20	32	31	13	18	29	0	29	24	3	21	10	7	3
chr11	2743431	3.88898e-14	2.47344e-11			Intergenic					2741987	2744700	16	15	1	89	85	4	31	22	9	48	27	21	36	25	11	38	24	14	54	28	26	31	1	30	14	13	1
chr11	2745032	5.22841e-13	2.8934e-10			Intergenic			2744701	2745814			14	8	6	157	55	102	17	5	12	75	44	31	49	25	24	60	21	39	50	47	3	33	33	0	16	11	5
chr11	2745625	1.38737e-05	0.00193059			Intergenic			2744701	2745814			16	12	4	142	83	59	51	38	13	83	44	39	36	11	25	36	17	19	60	27	33	44	7	37	18	13	5
chr11	2746862	4.94956e-30	1.51289e-26			Intergenic			2746625	2747221			16	16	0	105	98	7	36	33	3	68	27	41	60	32	28	56	27	29	105	37	68	75	3	72	20	19	1
chr11	2753087	1.32104e-07	3.12795e-05			Intergenic			2752932	2753267			10	10	0	64	61	3	17	17	0	16	12	4	24	18	6	23	18	5	30	21	9	20	5	15	11	11	0
chr11	2753179	6.26669e-05	0.00677955			Intergenic			2752932	2753267			11	9	2	107	97	10	51	29	22	22	19	3	21	21	0	35	35	0	42	7	35	21	20	1	11	6	5
chr11	2754491	2.50878e-05	0.00318376			Intergenic			2753618	2764369			38	14	24	133	33	100	51	36	15	111	43	68	46	3	43	99	75	24	140	79	61	66	37	29	39	11	28
chr11	2754495	2.00415e-30	6.29609e-27			Intergenic			2753618	2764369			25	9	16	105	99	6	42	25	17	114	59	55	50	21	29	66	35	31	83	2	81	54	2	52	15	9	6
chr11	2754496	3.9427e-31	1.32924e-27			Intergenic			2753618	2764369			28	20	8	110	103	7	45	19	26	83	47	36	46	25	21	73	41	32	90	0	90	48	2	46	31	18	13
chr11	2754526	2.07497e-29	5.94781e-26			Intergenic			2753618	2764369			25	7	18	105	97	8	42	28	14	115	61	54	50	22	28	66	35	31	83	1	82	54	2	52	15	9	6
chr11	2754527	1.43423e-30	4.55395e-27			Intergenic			2753618	2764369			28	18	10	110	101	9	45	19	26	83	47	36	46	27	19	72	42	30	90	0	90	48	2	46	31	15	16
chr11	2754533	1.01388e-34	4.70636e-31			Intergenic			2753618	2764369			25	9	16	105	103	2	42	27	15	115	61	54	50	23	27	66	35	31	83	0	83	54	2	52	15	9	6
chr11	2754534	9.92532e-31	3.24935e-27			Intergenic			2753618	2764369			28	19	9	110	104	6	44	20	24	83	47	36	46	24	22	72	44	28	90	0	90	48	2	46	31	18	13
chr11	2754569	2.30447e-35	1.15599e-31			Intergenic			2753618	2764369			17	16	1	134	129	5	51	50	1	70	36	34	36	18	18	99	46	53	74	28	46	67	5	62	20	20	0
chr11	2754573	1.10555e-40	8.93086e-37			Intergenic			2753618	2764369			17	17	0	134	129	5	51	49	2	70	39	31	36	20	16	99	44	55	74	27	47	67	6	61	20	16	4
chr11	2754980	1.77506e-08	4.97916e-06			Intergenic			2753618	2764369			37	5	32	196	87	109	82	15	67	121	30	91	63	19	44	77	21	56	82	1	81	49	8	41	26	3	23
chr11	2756248	3.29287e-06	0.000559475			Intergenic			2753618	2764369			19	13	6	152	87	65	40	21	19	115	55	60	62	26	36	96	63	33	49	4	45	37	3	34	24	13	11
chr11	2757390	4.20199e-05	0.00488046			Intergenic			2753618	2764369			15	3	12	108	22	86	39	19	20	47	5	42	27	3	24	64	31	33	12	12	0	18	17	1	18	0	18
chr11	2757441	5.73693e-34	2.47812e-30			Intergenic			2753618	2764369			22	13	9	113	107	6	63	22	41	112	44	68	49	25	24	91	40	51	103	2	101	75	2	73	37	18	19
chr11	2757464	5.28966e-11	2.22617e-08			Intergenic			2753618	2764369			37	26	11	205	138	67	75	41	34	100	35	65	51	23	28	81	39	42	142	57	85	54	5	49	29	18	11
chr11	2757465	3.81645e-06	0.000635586			Intergenic			2753618	2764369			33	22	11	211	118	93	102	63	39	136	109	27	68	50	18	117	91	26	140	101	39	75	74	1	62	37	25
chr11	2757570	1.60308e-11	7.29177e-09			Intergenic			2753618	2764369			10	4	6	141	96	45	18	12	6	42	24	18	42	18	24	57	24	33	30	2	28	28	1	27	10	7	3
chr11	2757973	4.42744e-25	8.94144e-22			Intergenic			2753618	2764369			21	3	18	110	8	102	49	5	44	82	27	55	42	18	24	80	28	52	80	37	43	64	62	2	16	1	15
chr11	2778539	1.55273e-05	0.00212458			Intergenic			2778069	2778701			13	5	8	98	91	7	44	32	12	92	64	28	58	37	21	75	51	24	136	82	54	121	70	51	16	13	3
chr11	2785532	6.09237e-12	2.93198e-09			Intergenic			2785229	2785609			46	25	21	146	42	104	53	31	22	117	50	67	37	17	20	107	70	37	151	100	51	79	62	17	34	18	16
chr11	2786631	2.82144e-09	9.0394e-07			Intergenic			2786325	2786807			26	17	9	183	111	72	80	57	23	110	82	28	54	37	17	120	83	37	80	77	3	61	61	0	27	19	8
chr11	2791354	4.37217e-15	3.09361e-12			Intergenic			2790234	2791422			21	3	18	88	41	47	57	12	45	93	35	58	41	13	28	93	19	74	96	1	95	81	1	80	27	3	24
chr11	2813545	1.43009e-08	4.08422e-06			Intergenic			2812971	2813608			27	15	12	124	91	33	65	54	11	132	82	50	32	31	1	103	90	13	102	102	0	61	59	2	30	19	11
chr11	2830479	1.7706e-11	8.02148e-09			Intergenic					2828590	2832314	22	21	1	70	36	34	32	23	9	45	35	10	44	41	3	91	85	6	91	90	1	61	54	7	16	15	1
chr11	2830505	2.4624e-13	1.41821e-10			Intergenic					2828590	2832314	22	21	1	70	36	34	32	22	10	45	34	11	44	44	0	91	88	3	91	88	3	61	56	5	16	15	1
chr11	2891356	1.70074e-114	2.11579e-108			Intergenic					2890513	2892219	16	7	9	171	154	17	12	6	6	99	0	99	45	0	45	48	0	48	127	0	127	83	0	83	37	0	37
chr11	2900269	1.48201e-06	0.000276497			Intergenic							12	0	12	89	5	84	37	5	32	58	11	47	65	25	40	60	12	48	93	25	68	89	32	57	12	1	11
chr11	2935464	2.04393e-38	1.38193e-34			Intergenic							11	4	7	100	92	8	15	3	12	69	0	69	47	24	23	35	11	24	62	0	62	66	2	64	11	0	11
chr11	2935477	4.04055e-17	3.57004e-14			Intergenic							13	6	7	142	55	87	31	22	9	42	36	6	61	30	31	56	39	17	50	42	8	63	60	3	12	11	1
chr11	2939503	9.04273e-06	0.00134323			Intergenic							10	7	3	42	36	6	27	19	8	39	29	10	35	29	6	25	21	4	61	27	34	97	53	44	10	6	4
chr11	2956871	6.79272e-46	9.94169e-42			Intergenic							20	13	7	112	107	5	36	11	25	63	0	63	34	12	22	59	29	30	95	0	95	48	3	45	24	0	24
chr11	2956873	5.04792e-32	1.87458e-28			Intergenic							20	13	7	112	107	5	36	11	25	63	5	58	34	14	20	59	34	25	95	7	88	48	6	42	24	4	20
chr11	3023655	4.30692e-06	0.000705			Intergenic			3023107	3023953			16	13	3	69	35	34	24	0	24	76	72	4	42	41	1	68	59	9	68	45	23	53	50	3	11	7	4
chr11	3045719	7.35398e-05	0.00770025			Intergenic					3044326	3046325	18	4	14	113	44	69	29	7	22	77	46	31	40	18	22	52	18	34	60	37	23	79	49	30	19	11	8
chr11	3051132	1.77691e-05	0.00238181			Intergenic							14	14	0	44	23	21	32	14	18	44	37	7	38	32	6	44	40	4	56	52	4	58	47	11	10	9	1
chr11	3125639	6.33379e-08	1.60153e-05			Intergenic			3125303	3127418			12	0	12	63	0	63	30	0	30	69	1	68	24	0	24	44	0	44	66	4	62	56	13	43	17	1	16
chr11	3125648	9.51888e-05	0.00944857			Intergenic			3125303	3127418			12	0	12	63	1	62	30	1	29	69	10	59	24	0	24	44	1	43	66	3	63	56	21	35	17	0	17
chr11	3125777	2.46424e-05	0.00313811			Intergenic			3125303	3127418			16	0	16	95	0	95	38	1	37	63	0	63	31	1	30	69	1	68	74	1	73	65	10	55	20	1	19
chr11	3144240	2.82325e-05	0.00350437			Intergenic							13	8	5	81	25	56	16	9	7	83	50	33	82	32	50	42	24	18	90	54	36	96	60	36	13	12	1
chr11	3177662	1.48492e-06	0.000276915			Intergenic							14	7	7	104	73	31	16	9	7	99	67	32	62	28	34	33	12	21	101	55	46	79	28	51	15	5	10
chr11	3178382	2.43296e-06	0.000429198			Intergenic							13	4	9	46	2	44	12	2	10	42	10	32	60	24	36	50	18	32	51	20	31	73	34	39	14	6	8
chr11	3192473	2.39608e-11	1.0623e-08			Intergenic					3190555	3194212	10	9	1	101	57	44	21	9	12	59	55	4	35	33	2	42	41	1	104	95	9	72	62	10	11	11	0
chr11	3192513	2.15607e-05	0.00281039			Intergenic					3190555	3194212	11	6	5	121	55	66	19	3	16	81	34	47	61	18	43	49	25	24	101	25	76	111	22	89	11	3	8
chr11	3194129	3.15204e-11	1.3663e-08			Intergenic					3190555	3194212	11	10	1	80	33	47	34	15	19	56	55	1	31	29	2	61	35	26	62	58	4	48	44	4	10	10	0
chr11	3209892	6.99327e-30	2.10652e-26			Intergenic			3209644	3210172			17	17	0	135	60	75	19	3	16	75	72	3	25	24	1	55	54	1	94	91	3	60	59	1	14	13	1
chr11	3259675	7.32094e-05	0.00767405			Intergenic			3259638	3260089			16	7	9	66	24	42	23	5	18	48	0	48	32	5	27	81	15	66	57	13	44	51	0	51	19	3	16
chr11	3259676	2.53463e-08	6.88619e-06			Intergenic			3259638	3260089			21	2	19	89	47	42	33	7	26	46	1	45	20	3	17	65	7	58	64	9	55	49	2	47	18	4	14
chr11	3262131	1.56789e-11	7.14479e-09			Intergenic			3261931	3262185			26	25	1	74	35	39	19	7	12	91	83	8	59	54	5	60	56	4	102	92	10	89	82	7	24	23	1
chr11	3262132	1.49156e-14	9.89104e-12			Intergenic			3261931	3262185			17	17	0	81	43	38	14	6	8	86	75	11	40	39	1	44	41	3	115	110	5	71	66	5	26	26	0
chr11	3270625	2.23043e-05	0.0028898			Intergenic			3270599	3271713			27	0	27	51	0	51	45	0	45	58	2	56	39	0	39	41	0	41	87	1	86	77	13	64	17	0	17
chr11	3271255	2.71852e-05	0.0033969			Intergenic			3270599	3271713			19	1	18	73	16	57	49	6	43	57	18	39	41	15	26	47	10	37	95	28	67	85	40	45	22	8	14
chr11	3271277	5.98421e-05	0.00652864			Intergenic			3270599	3271713			19	2	17	73	17	56	49	5	44	58	20	38	41	13	28	47	14	33	95	37	58	85	39	46	22	5	17
chr11	3323190	7.27775e-13	3.9571e-10			Intergenic					3321344	3323343	26	26	0	76	32	44	51	44	7	65	50	15	38	34	4	97	91	6	95	90	5	79	75	4	25	22	3
chr11	3323191	5.43835e-12	2.63661e-09			Intergenic					3321344	3323343	19	18	1	53	18	35	57	51	6	48	47	1	35	31	4	68	63	5	55	54	1	68	65	3	12	11	1
chr11	3492101	2.4402e-10	9.27784e-08			Intergenic							12	11	1	120	67	53	48	26	22	69	51	18	51	23	28	72	36	36	93	85	8	100	91	9	26	24	2
chr11	3500711	7.90779e-06	0.0011949			Intergenic							14	13	1	115	88	27	18	15	3	64	54	10	30	27	3	75	70	5	65	62	3	69	66	3	13	12	1
chr11	3508339	1.31431e-09	4.44913e-07			Intergenic							18	17	1	72	30	42	30	28	2	42	35	7	29	26	3	41	37	4	66	57	9	74	68	6	14	14	0
chr11	3508340	1.95078e-12	1.00878e-09			Intergenic							11	10	1	109	52	57	21	16	5	48	41	7	33	29	4	32	29	3	76	72	4	61	52	9	19	17	2
chr11	3555873	2.66025e-07	5.90554e-05			Intergenic							17	17	0	61	25	36	31	27	4	52	49	3	39	36	3	58	52	6	69	59	10	40	38	2	13	12	1
chr11	3555874	2.59796e-05	0.00327654			Intergenic							26	24	2	70	35	35	52	49	3	68	60	8	41	35	6	73	61	12	88	79	9	65	62	3	14	11	3
chr11	3641294	8.57942e-09	2.55156e-06			Intergenic			3641293	3641848			11	10	1	52	24	28	25	21	4	41	24	17	37	36	1	28	25	3	57	50	7	44	41	3	10	10	0
chr11	3667451	7.91873e-05	0.0081523			Intergenic					3664640	3668130	15	11	4	156	120	36	24	13	11	78	41	37	68	27	41	42	29	13	95	44	51	103	56	47	16	11	5
chr11	3783562	2.12907e-05	0.00278103			Intergenic			3783254	3783946			20	3	17	51	23	28	28	2	26	51	17	34	24	11	13	61	4	57	63	6	57	42	5	37	15	1	14
chr11	3783579	9.59698e-05	0.00951167			Intergenic			3783254	3783946			20	3	17	51	23	28	28	2	26	51	19	32	24	9	15	61	5	56	63	9	54	42	5	37	15	1	14
chr11	3783588	2.4952e-05	0.0031704			Intergenic			3783254	3783946			19	6	13	103	56	47	35	3	32	67	37	30	55	26	29	58	6	52	89	16	73	69	25	44	23	5	18
chr11	3783594	7.56528e-05	0.00786983			Intergenic			3783254	3783946			20	3	17	51	22	29	28	1	27	51	22	29	24	9	15	61	5	56	63	9	54	42	4	38	15	1	14
chr11	3783604	0.000101401	0.00992506			Intergenic			3783254	3783946			20	3	17	51	22	29	28	2	26	51	21	30	24	9	15	61	5	56	63	10	53	42	4	38	15	1	14
chr11	4029158	3.69421e-05	0.00438275			Intergenic							17	5	12	164	58	106	69	11	58	102	43	59	70	34	36	47	11	36	113	23	90	91	8	83	20	4	16
chr11	4277597	1.26586e-13	7.56018e-11			Intergenic					4277184	4280373	16	9	7	60	12	48	48	26	22	53	20	33	47	21	26	98	75	23	101	76	25	102	79	23	17	8	9
chr11	4358967	1.20076e-05	0.00170993			Intergenic			4358714	4359711			13	2	11	78	53	25	23	4	19	32	16	16	18	9	9	42	13	29	33	11	22	28	4	24	15	3	12
chr11	4358972	4.0843e-06	0.000673521			Intergenic			4358714	4359711			13	2	11	78	55	23	23	4	19	32	16	16	18	10	8	42	13	29	33	11	22	28	4	24	15	3	12
chr11	4358980	1.66241e-06	0.000305661			Intergenic			4358714	4359711			13	2	11	78	55	23	23	4	19	32	17	15	18	10	8	42	11	31	33	11	22	28	4	24	15	3	12
chr11	4358984	6.32079e-07	0.000129566			Intergenic			4358714	4359711			13	2	11	78	54	24	23	5	18	32	16	16	18	10	8	42	10	32	33	11	22	28	3	25	15	3	12
chr11	4358986	3.85505e-06	0.000640814			Intergenic			4358714	4359711			13	2	11	78	53	25	23	3	20	32	15	17	18	11	7	42	11	31	33	11	22	28	4	24	15	2	13
chr11	4358989	1.08269e-06	0.000209033			Intergenic			4358714	4359711			13	1	12	78	55	23	23	4	19	32	17	15	18	10	8	42	10	32	33	11	22	28	3	25	15	3	12
chr11	4358993	9.77247e-06	0.00143166			Intergenic			4358714	4359711			13	2	11	79	56	23	23	7	16	32	17	15	18	10	8	43	14	29	31	12	19	28	4	24	15	4	11
chr11	4492776	2.58346e-05	0.00326189			Intergenic							15	13	2	137	83	54	83	48	35	64	57	7	80	34	46	123	65	58	91	80	11	74	67	7	21	20	1
chr11	4510906	1.76568e-18	1.83048e-15			Intergenic			4510235	4511193			14	13	1	83	41	42	33	18	15	84	77	7	25	16	9	58	56	2	71	68	3	53	53	0	11	11	0
chr11	4510907	1.9843e-15	1.46155e-12			Intergenic			4510235	4511193			11	10	1	99	52	47	26	14	12	60	56	4	33	12	21	47	43	4	68	66	2	60	58	2	17	17	0
chr11	4539910	1.50069e-05	0.0020645			Intergenic					4537935	4539934	12	4	8	83	58	25	41	20	21	98	55	43	46	32	14	76	38	38	89	39	50	112	37	75	13	7	6
chr11	4539911	1.93069e-06	0.000349463			Intergenic					4537935	4539934	19	6	13	167	39	128	77	31	46	127	43	84	72	20	52	116	54	62	111	48	63	159	77	82	28	12	16
chr11	4542468	2.43583e-07	5.45309e-05			Intergenic							27	4	23	176	84	92	45	4	41	147	45	102	77	23	54	81	4	77	150	42	108	105	16	89	23	3	20
chr11	4543793	1.2849e-05	0.00180986			Intergenic							23	12	11	162	36	126	77	28	49	130	49	81	44	7	37	119	62	57	137	70	67	139	55	84	25	14	11
chr11	4561074	5.17228e-09	1.59864e-06			Intergenic			4560877	4561250			38	18	20	77	21	56	61	24	37	99	31	68	28	10	18	106	52	54	144	89	55	104	60	44	28	20	8
chr11	4659016	2.72908e-05	0.00340667			Intergenic			4658873	4659121			20	6	14	132	41	91	26	3	23	102	45	57	70	27	43	87	30	57	133	70	63	105	46	59	26	18	8
chr11	4760738	4.93358e-05	0.00557303			Intergenic			4760158	4761114			18	8	10	61	45	16	22	8	14	54	35	19	16	8	8	44	15	29	56	20	36	36	12	24	13	6	7
chr11	4958265	4.61032e-06	0.000749436			Intergenic			4957455	4959193			11	0	11	48	30	18	23	0	23	61	38	23	30	16	14	42	6	36	69	10	59	53	10	43	15	4	11
chr11	4958276	5.91461e-05	0.0064686			Intergenic			4957455	4959193			11	0	11	48	29	19	23	0	23	61	41	20	30	16	14	42	7	35	69	14	55	53	11	42	15	4	11
chr11	4958283	4.56531e-05	0.00522921			Intergenic			4957455	4959193			11	0	11	48	30	18	23	0	23	61	37	24	30	16	14	42	6	36	69	10	59	53	13	40	15	4	11
chr11	4964271	1.5346e-05	0.00210347			Intergenic					4962870	4964869	13	3	10	111	14	97	42	15	27	73	8	65	60	16	44	103	33	70	125	38	87	138	53	85	16	3	13
chr11	4964272	1.49285e-05	0.00205576			Intergenic					4962870	4964869	20	15	5	105	96	9	74	35	39	70	53	17	59	49	10	108	65	43	154	92	62	118	68	50	19	13	6
chr11	5190703	2.7373e-05	0.00341488			Intergenic					5187962	5191944	10	7	3	163	120	43	17	10	7	75	53	22	53	18	35	28	15	13	57	38	19	64	21	43	23	17	6
chr11	5378196	6.81886e-05	0.00724915			Intergenic							12	2	10	57	5	52	22	3	19	37	7	30	42	2	40	37	16	21	44	10	34	52	18	34	10	4	6
chr11	5394167	3.87924e-05	0.00456613			Intergenic							20	10	10	73	33	40	14	3	11	65	28	37	45	21	24	43	0	43	62	29	33	44	0	44	10	3	7
chr11	5521043	8.87559e-08	2.18171e-05			Intergenic			5520708	5521294			23	2	21	137	66	71	24	3	21	107	47	60	67	26	41	68	9	59	108	22	86	70	8	62	22	5	17
chr11	5622616	1.3468e-05	0.00188425			Intergenic					5621444	5623443	18	3	15	87	11	76	64	25	39	70	13	57	58	12	46	102	17	85	148	45	103	147	68	79	18	4	14
chr11	5635303	1.09559e-05	0.00158208			Intergenic			5634809	5635321			11	2	9	120	12	108	17	4	13	80	9	71	29	2	27	31	16	15	64	15	49	61	22	39	11	2	9
chr11	6087269	1.60512e-07	3.7443e-05			Intergenic							19	19	0	67	65	2	15	9	6	67	52	15	44	31	13	56	43	13	73	55	18	83	49	34	12	8	4
chr11	6103016	2.07389e-05	0.0027201			Intergenic							17	2	15	74	8	66	41	7	34	57	11	46	50	2	48	58	15	43	84	25	59	81	32	49	12	0	12
chr11	6125287	6.79507e-31	2.24227e-27			Intergenic							12	4	8	103	0	103	41	39	2	72	35	37	38	20	18	81	46	35	124	114	10	82	79	3	19	0	19
chr11	6125288	3.50564e-22	5.44465e-19			Intergenic							19	11	8	88	1	87	37	32	5	67	32	35	35	20	15	69	43	26	106	102	4	71	67	4	22	0	22
chr11	6125335	7.64011e-22	1.13964e-18			Intergenic							12	9	3	103	99	4	42	5	37	72	32	40	38	17	21	81	43	38	124	18	106	82	9	73	19	19	0
chr11	6156121	2.30105e-05	0.0029652			Intergenic			6155334	6156225			20	10	10	103	35	68	24	13	11	68	35	33	46	15	31	59	41	18	76	51	25	66	41	25	33	18	15
chr11	6316313	2.60262e-05	0.00328141			Intergenic							12	4	8	98	49	49	29	0	29	56	23	33	48	20	28	48	26	22	64	0	64	60	0	60	13	13	0
chr11	6432716	3.24616e-05	0.00393214			Intergenic							16	14	2	81	70	11	28	16	12	42	22	20	36	33	3	48	47	1	61	59	2	64	61	3	11	10	1
chr11	6470208	1.89366e-20	2.47198e-17			Intergenic							19	16	3	94	37	57	73	31	42	122	55	67	41	28	13	119	97	22	126	107	19	98	84	14	23	17	6
chr11	6546159	8.1036e-05	0.00830209	NM_001012613	SLC7A1	Intron	6544757	6546806			6544878	6546877	42	18	24	91	24	67	89	32	57	190	62	128	62	15	47	189	81	108	170	83	87	154	73	81	51	23	28
chr11	6548819	4.31441e-08	1.1257e-05	NM_001012613	SLC7A1	Intron	6546910	6549512			6547472	6549471	12	6	6	87	75	12	61	19	42	71	48	23	57	35	22	78	27	51	128	51	77	102	42	60	17	9	8
chr11	6554347	8.28758e-06	0.00124473	NM_001012613	SLC7A1	Intron	6551090	6556533	6553942	6554463			19	16	3	67	30	37	16	15	1	69	54	15	34	17	17	36	35	1	70	66	4	44	32	12	16	14	2
chr11	6554398	2.37499e-15	1.73391e-12	NM_001012613	SLC7A1	Intron	6551090	6556533	6553942	6554463			24	23	1	102	48	54	30	29	1	93	81	12	33	21	12	99	94	5	92	87	5	71	67	4	33	32	1
chr11	6560840	9.79918e-05	0.00967047	NM_001012613	SLC7A1	Exon	6560491	6560872	6560541	6561067			18	8	10	196	148	48	13	4	9	123	68	55	67	45	22	61	31	30	93	62	31	105	52	53	25	8	17
chr11	6565166	6.1188e-05	0.00665099	NM_001012613	SLC7A1	Intron	6560873	6589064					16	8	8	63	15	48	55	26	29	61	19	42	67	30	37	97	36	61	113	60	53	110	60	50	19	13	6
chr11	6565167	1.08499e-05	0.0015684	NM_001012613	SLC7A1	Intron	6560873	6589064					30	13	17	91	76	15	104	42	62	91	66	25	60	33	27	119	54	65	182	89	93	132	54	78	26	12	14
chr11	6580258	6.69259e-16	5.15853e-13	NM_001012613	SLC7A1	Intron	6560873	6589064	6579999	6580270			12	11	1	93	40	53	37	34	3	88	82	6	54	27	27	87	85	2	107	99	8	88	83	5	25	23	2
chr11	6691556	7.55991e-08	1.8828e-05			Intergenic							21	11	10	111	109	2	17	7	10	71	60	11	53	43	10	40	23	17	116	83	33	98	55	43	12	8	4
chr11	6793054	9.07457e-05	0.00908511			Intergenic							10	6	4	200	104	96	18	2	16	105	53	52	81	43	38	51	15	36	81	27	54	104	34	70	12	4	8
chr11	7179780	3.52712e-05	0.00421386			Intergenic							20	16	4	120	97	23	31	23	8	86	73	13	49	44	5	69	66	3	79	73	6	81	75	6	13	13	0
chr11	7219248	4.51324e-05	0.00518197			Intergenic							19	6	13	176	91	85	30	5	25	80	26	54	68	34	34	73	11	62	84	27	57	80	19	61	18	7	11
chr11	7773310	6.97396e-06	0.00107229			Intergenic							12	7	5	92	9	83	23	11	12	110	58	52	39	10	29	54	23	31	86	45	41	74	38	36	16	8	8
chr11	7880496	2.13847e-15	1.56583e-12			Intergenic							26	9	17	94	88	6	14	7	7	108	98	10	45	43	2	50	24	26	74	39	35	55	4	51	14	12	2
chr11	7981854	2.80194e-30	8.69259e-27			Intergenic			7981536	7981910			12	5	7	127	119	8	12	3	9	64	62	2	39	38	1	39	18	21	53	24	29	69	0	69	10	10	0
chr11	8010623	2.08282e-05	0.00272979			Intergenic							28	9	19	157	137	20	70	30	40	87	54	33	59	27	32	152	64	88	174	101	73	125	66	59	38	19	19
chr11	8010624	1.02442e-06	0.000199097			Intergenic							15	7	8	94	11	83	56	25	31	85	29	56	60	20	40	94	49	45	144	72	72	89	37	52	20	11	9
chr11	8284732	7.05014e-06	0.00108293			Intergenic							29	13	16	189	103	86	75	7	68	138	50	88	84	31	53	107	16	91	177	52	125	113	31	82	31	12	19
chr11	8556529	4.61034e-24	8.49699e-21			Intergenic							29	28	1	41	5	36	49	36	13	83	59	24	48	44	4	146	136	10	152	148	4	110	106	4	35	34	1
chr11	8884973	0.000101942	0.00996385			Intergenic			8884615	8885750			24	1	23	79	2	77	33	0	33	51	3	48	40	2	38	78	7	71	70	5	65	63	15	48	19	1	18
chr11	9543382	8.98932e-05	0.00901863			Intergenic			9542941	9544354			18	11	7	96	95	1	45	42	3	121	116	5	26	23	3	68	24	44	110	108	2	52	47	5	25	13	12
chr11	9595089	5.50343e-09	1.69217e-06			Intergenic							14	11	3	65	29	36	28	12	16	50	25	25	11	0	11	85	48	37	71	0	71	63	3	60	18	10	8
chr11	10609420	8.25141e-11	3.3823e-08			Intergenic							12	5	7	39	0	39	20	8	12	55	0	55	17	6	11	40	0	40	58	28	30	47	38	9	12	0	12
chr11	10754352	6.50964e-22	9.828e-19			Intergenic					10752764	10754763	22	0	22	78	38	40	36	0	36	65	0	65	33	0	33	58	0	58	90	0	90	72	0	72	24	0	24
chr11	11509762	2.12169e-05	0.00277348			Intergenic							29	6	23	106	15	91	43	33	10	60	7	53	35	3	32	61	42	19	75	28	47	68	36	32	25	6	19
chr11	12012506	6.16323e-05	0.00669167			Intergenic			12012361	12012595			14	5	9	126	125	1	30	14	16	90	38	52	32	30	2	61	1	60	89	40	49	83	74	9	14	7	7
chr11	12013906	1.73541e-05	0.00233347			Intergenic			12013732	12013950			13	7	6	139	25	114	37	15	22	64	14	50	38	2	36	54	31	23	62	26	36	72	35	37	15	4	11
chr11	15114310	3.26325e-06	0.000555437			Intergenic							18	7	11	116	46	70	16	15	1	60	50	10	43	37	6	61	54	7	68	59	9	59	23	36	17	17	0
chr11	15186776	6.56912e-05	0.00704081			Intergenic			15186325	15186954			13	0	13	76	1	75	63	0	63	75	5	70	64	0	64	100	2	98	115	4	111	76	16	60	24	0	24
chr11	15209177	3.16106e-06	0.000540623			Intergenic							18	16	2	53	49	4	74	41	33	81	71	10	58	41	17	121	74	47	146	88	58	108	62	46	21	13	8
chr11	15532852	5.9962e-05	0.00653795	NM_001243910	SLC25A15	Exon	15532785	15533043	15532793	15533060			16	16	0	108	108	0	34	32	2	69	60	9	44	44	0	60	58	2	101	96	5	93	75	18	12	11	1
chr11	16977827	2.98587e-07	6.55239e-05			Intergenic					16977340	16979339	18	8	10	80	43	37	14	0	14	64	0	64	21	0	21	56	1	55	90	0	90	45	25	20	22	0	22
chr11	17006756	6.33557e-05	0.00684237			Intergenic							18	13	5	102	89	13	18	14	4	87	64	23	38	30	8	33	27	6	64	39	25	33	20	13	26	15	11
chr11	17681751	1.93367e-07	4.43016e-05			Intergenic			17681694	17683277			13	1	12	91	58	33	17	3	14	82	52	30	39	18	21	39	2	37	60	11	49	48	13	35	14	6	8
chr11	17681759	3.43578e-08	9.12329e-06			Intergenic			17681694	17683277			13	1	12	92	59	33	17	2	15	83	54	29	39	17	22	39	1	38	60	11	49	48	13	35	14	5	9
chr11	17681776	4.56222e-07	9.6491e-05			Intergenic			17681694	17683277			13	1	12	93	59	34	17	2	15	83	56	27	39	17	22	39	2	37	60	13	47	48	13	35	14	6	8
chr11	17681785	5.67206e-07	0.000117448			Intergenic			17681694	17683277			13	1	12	93	55	38	17	1	16	83	54	29	39	17	22	39	1	38	60	10	50	48	13	35	14	5	9
chr11	17681793	1.14764e-05	0.0016454			Intergenic			17681694	17683277			13	1	12	93	53	40	17	1	16	83	53	30	39	18	21	39	1	38	60	13	47	48	13	35	14	5	9
chr11	17681816	2.05707e-08	5.68434e-06			Intergenic			17681694	17683277			12	5	7	93	62	31	17	3	14	83	58	25	39	19	20	37	4	33	60	17	43	48	15	33	14	5	9
chr11	17718669	5.03002e-05	0.00566039			Intergenic							19	11	8	70	46	24	47	45	2	68	1	67	31	15	16	90	45	45	117	1	116	64	64	0	23	0	23
chr11	19272593	4.64136e-15	3.26586e-12	NM_001285967	RB1	Intron	19270036	19273942					27	16	11	66	24	42	32	1	31	78	64	14	38	15	23	60	46	14	95	76	19	57	50	7	20	18	2
chr11	19272594	4.05338e-07	8.66422e-05	NM_001285967	RB1	Intron	19270036	19273942					14	7	7	71	36	35	24	0	24	53	42	11	35	12	23	52	45	7	71	49	22	53	40	13	19	16	3
chr11	19317250	8.87367e-05	0.0089242	NM_001285967	RB1	Intron	19315220	19317340	19317016	19318088			18	3	15	71	0	71	42	1	41	102	0	102	19	0	19	87	0	87	89	0	89	56	0	56	23	0	23
chr11	19334882	3.31694e-05	0.00399885			Intergenic							17	13	4	96	68	28	34	18	16	63	44	19	46	34	12	73	45	28	84	51	33	136	56	80	14	10	4
chr11	20766664	2.45863e-12	1.2556e-09			Intergenic							16	13	3	80	1	79	22	0	22	56	25	31	30	15	15	73	41	32	109	103	6	53	1	52	15	11	4
chr11	20778510	1.07747e-09	3.70076e-07			Intergenic							17	16	1	67	39	28	44	23	21	83	77	6	50	20	30	90	83	7	97	93	4	73	64	9	28	27	1
chr11	20843953	1.50914e-08	4.28541e-06			Intergenic							16	10	6	81	73	8	51	38	13	83	64	19	49	30	19	106	80	26	106	63	43	122	63	59	16	9	7
chr11	21011137	3.12813e-05	0.00381935			Intergenic							20	13	7	77	41	36	49	14	35	87	62	25	39	26	13	101	59	42	100	91	9	105	73	32	27	16	11
chr11	21011145	1.15516e-06	0.000221667			Intergenic							20	14	6	77	48	29	49	19	30	87	65	22	39	23	16	101	61	40	100	96	4	105	89	16	27	17	10
chr11	21011149	5.41938e-05	0.00600779			Intergenic							10	5	5	44	24	20	28	14	14	37	24	13	26	15	11	47	34	13	48	47	1	39	29	10	10	6	4
chr11	21011150	1.29189e-06	0.000245369			Intergenic							20	12	8	77	46	31	49	20	29	86	62	24	39	23	16	101	68	33	100	96	4	105	80	25	27	18	9
chr11	21011158	4.75462e-05	0.00540178			Intergenic							20	13	7	77	50	27	49	28	21	87	54	33	39	26	13	99	67	32	100	95	5	104	83	21	27	17	10
chr11	21929181	8.77822e-05	0.00884894			Promoter	21928293	21930293	21928915	21930059			12	2	10	64	0	64	44	0	44	76	0	76	39	0	39	97	0	97	86	0	86	79	0	79	18	0	18
chr11	22307529	8.84991e-06	0.00131837			Intergenic							21	8	13	105	34	71	41	35	6	91	28	63	44	2	42	79	61	18	93	60	33	48	34	14	22	7	15
chr11	22465225	1.60192e-11	7.28916e-09			Intergenic							12	8	4	94	17	77	12	9	3	54	16	38	36	0	36	40	27	13	54	33	21	61	45	16	12	7	5
chr11	23869196	2.20842e-05	0.00286841			Intergenic							27	21	6	33	29	4	64	50	14	67	51	16	44	27	17	102	70	32	97	54	43	120	70	50	25	17	8
chr11	27385413	3.02605e-17	2.71025e-14			Intergenic							16	14	2	107	47	60	11	5	6	68	34	34	30	28	2	48	43	5	72	72	0	74	68	6	14	8	6
chr11	27385499	7.99136e-18	7.68284e-15			Intergenic							16	0	16	107	55	52	12	2	10	68	27	41	30	0	30	48	1	47	72	0	72	74	0	74	14	6	8
chr11	29063978	7.62378e-05	0.00791481			Intergenic							16	12	4	74	48	26	28	16	12	64	39	25	76	63	13	54	38	16	108	95	13	76	68	8	13	6	7
chr11	31694455	1.04471e-05	0.00151776			Intergenic							15	15	0	86	78	8	16	5	11	68	35	33	25	24	1	48	45	3	94	39	55	62	48	14	21	8	13
chr11	35804706	9.20816e-07	0.000181198			Intergenic							22	15	7	76	65	11	78	57	21	59	45	14	31	19	12	137	84	53	97	50	47	91	50	41	18	12	6
chr11	35805818	3.8078e-05	0.00449608			Intergenic							24	8	16	122	25	97	63	25	38	114	25	89	54	10	44	101	50	51	107	34	73	104	45	59	36	18	18
chr11	35807267	2.34038e-05	0.00300653			Intergenic							14	12	2	120	94	26	20	15	5	53	45	8	42	37	5	33	29	4	80	75	5	73	69	4	14	14	0
chr11	35870978	9.81412e-07	0.000191757			Intergenic							13	12	1	13	11	2	42	30	12	13	12	1	25	24	1	70	65	5	82	81	1	78	78	0	14	14	0
chr11	35871007	8.999e-12	4.24058e-09			Intergenic							19	8	11	77	65	12	66	25	41	54	41	13	59	34	25	107	38	69	126	48	78	114	37	77	18	4	14
chr11	35871875	4.79075e-08	1.24216e-05			Intergenic							25	0	25	87	37	50	45	15	30	84	31	53	37	0	37	104	0	104	94	0	94	60	0	60	26	17	9
chr11	35871876	5.63581e-15	3.9125e-12			Intergenic							17	0	17	81	39	42	25	13	12	74	25	49	29	0	29	76	2	74	86	3	83	48	1	47	13	4	9
chr11	35876143	8.95209e-08	2.19877e-05			Intergenic							12	12	0	54	37	17	31	15	16	52	37	15	22	22	0	93	88	5	94	90	4	57	57	0	18	11	7
chr11	38518119	2.52917e-06	0.000444396			Intergenic							11	5	6	89	60	29	16	4	12	69	42	27	52	12	40	45	20	25	61	17	44	46	15	31	23	9	14
chr11	41596117	2.77596e-05	0.00345548			Intergenic							11	4	7	71	59	12	11	3	8	52	30	22	34	19	15	34	13	21	49	22	27	14	5	9	15	6	9
chr11	43176768	1.57672e-11	7.17975e-09			Intergenic							11	4	7	94	77	17	32	21	11	73	66	7	38	27	11	40	0	40	64	21	43	58	25	33	16	12	4
chr11	43969138	8.84352e-11	3.60712e-08			Intergenic							12	11	1	111	52	59	22	11	11	65	34	31	42	42	0	36	33	3	60	55	5	62	55	7	14	6	8
chr11	43969146	6.26712e-10	2.2295e-07			Intergenic							12	11	1	111	46	65	22	9	13	65	30	35	43	38	5	36	29	7	60	51	9	62	54	8	14	5	9
chr11	44899996	0.00010012	0.00982984			Intergenic							19	9	10	74	62	12	30	20	10	49	38	11	41	22	19	57	43	14	107	44	63	87	51	36	22	13	9
chr11	44900021	3.3237e-05	0.00400584			Intergenic							19	8	11	74	58	16	30	16	14	49	34	15	41	19	22	56	36	20	107	45	62	87	40	47	22	9	13
chr11	45516329	4.89051e-17	4.27849e-14			Intergenic							15	1	14	102	0	102	70	0	70	73	0	73	55	0	55	73	57	16	90	35	55	75	4	71	12	5	7
chr11	46399315	1.09425e-06	0.000210955			Intergenic							12	0	12	41	0	41	44	0	44	50	1	49	39	0	39	90	40	50	67	1	66	55	1	54	19	11	8
chr11	46399316	1.45456e-05	0.00200992			Intergenic							20	0	20	43	0	43	58	0	58	63	0	63	30	0	30	113	51	62	92	0	92	64	0	64	21	9	12
chr11	47645952	7.97776e-05	0.00820018			Intergenic							15	12	3	142	85	57	42	18	24	66	0	66	42	17	25	70	0	70	100	98	2	83	77	6	18	0	18
chr11	47645968	1.62185e-05	0.00220051			Intergenic							15	12	3	142	80	62	42	18	24	66	0	66	42	17	25	70	0	70	100	96	4	83	77	6	18	0	18
chr11	47916321	5.22824e-16	4.08552e-13			Intergenic							35	17	18	161	72	89	28	18	10	100	71	29	35	33	2	75	60	15	88	84	4	90	68	22	24	18	6
chr11	48370393	6.90443e-11	2.85362e-08			Intergenic							11	10	1	60	25	35	14	6	8	45	42	3	27	15	12	43	41	2	83	0	83	54	2	52	10	9	1
chr11	48370394	2.03122e-11	9.1093e-09			Intergenic							13	13	0	64	34	30	17	3	14	70	62	8	40	17	23	59	53	6	82	1	81	61	2	59	18	18	0
chr11	49020352	1.02144e-19	1.2361e-16			Intergenic							22	13	9	109	53	56	22	20	2	79	35	44	50	45	5	71	67	4	119	114	5	78	76	2	18	8	10
chr11	50172889	2.8234e-05	0.00350437			Intergenic							14	8	6	133	60	73	47	40	7	70	25	45	39	20	19	76	64	12	85	72	13	71	55	16	18	0	18
chr11	50217148	2.31768e-06	0.000411252			Intergenic							31	12	19	90	3	87	30	13	17	74	6	68	39	3	36	73	39	34	80	28	52	55	25	30	22	4	18
chr11	50738753	4.39448e-05	0.00506712			Intergenic			50738346	50738794			16	3	13	64	30	34	38	6	32	61	16	45	31	11	20	67	7	60	63	11	52	44	7	37	12	0	12
chr11	52662354	6.82436e-20	8.40574e-17			Intergenic							14	10	4	118	68	50	18	13	5	44	24	20	38	13	25	52	22	30	71	14	57	87	2	85	10	4	6
chr11	57606880	4.38219e-05	0.00505728			Intergenic							27	12	15	85	80	5	25	16	9	76	70	6	33	23	10	79	56	23	93	55	38	86	60	26	30	14	16
chr11	57738027	5.09003e-05	0.00571758			Intergenic							17	0	17	73	0	73	36	0	36	52	0	52	39	0	39	41	2	39	51	1	50	66	6	60	10	1	9
chr11	59620936	4.76037e-06	0.000770205			Intergenic							42	29	13	205	183	22	50	40	10	186	144	42	90	67	23	125	90	35	160	96	64	81	63	18	47	33	14
chr11	62498340	2.92513e-44	3.60296e-40			Intergenic							12	0	12	65	0	65	15	0	15	49	1	48	31	0	31	24	0	24	79	48	31	54	45	9	15	8	7
chr11	62498374	8.11623e-48	1.4221e-43			Intergenic							12	0	12	65	0	65	15	0	15	50	1	49	31	0	31	24	1	23	79	43	36	54	49	5	15	9	6
chr11	64174021	1.59532e-05	0.00217208			Intergenic							19	9	10	101	38	63	22	7	15	85	43	42	79	38	41	78	50	28	129	65	64	90	57	33	22	18	4
chr11	64196204	7.37089e-10	2.60175e-07			Intergenic							20	0	20	62	16	46	30	0	30	62	0	62	34	0	34	51	0	51	83	0	83	60	0	60	22	0	22
chr11	66520615	8.47493e-12	4.00881e-09			Intergenic							10	5	5	53	0	53	68	0	68	83	0	83	57	0	57	105	52	53	106	57	49	99	0	99	29	15	14
chr11	66715196	2.1966e-06	0.000391836			Intergenic			66714769	66715222			20	0	20	70	0	70	40	0	40	58	0	58	30	0	30	80	16	64	76	19	57	54	0	54	16	2	14
chr11	67395581	6.13514e-16	4.75537e-13			Intergenic							18	8	10	72	0	72	24	6	18	54	51	3	55	50	5	81	38	43	90	86	4	74	47	27	14	6	8
chr11	67395582	3.17404e-11	1.3744e-08			Intergenic							13	5	8	60	1	59	24	15	9	48	43	5	26	23	3	52	29	23	64	62	2	56	30	26	13	9	4
chr11	67435548	4.85655e-16	3.80463e-13			Intergenic							22	15	7	129	0	129	27	12	15	89	75	14	45	39	6	58	29	29	99	94	5	86	40	46	20	9	11
chr11	67477910	1.4659e-05	0.00202334			Intergenic							29	9	20	90	11	79	48	18	30	88	12	76	72	14	58	129	46	83	142	46	96	160	65	95	34	10	24
chr11	67477911	1.27307e-05	0.00179604			Intergenic							16	13	3	65	63	2	47	35	12	47	37	10	50	38	12	66	51	15	102	74	28	86	52	34	15	11	4
chr11	67536163	4.01381e-05	0.00469875			Intergenic							29	17	12	173	100	73	82	35	47	182	105	77	69	32	37	153	75	78	213	110	103	132	39	93	60	23	37
chr11	67766924	7.96762e-05	0.00819178			Intergenic					67765432	67767431	12	12	0	123	116	7	14	12	2	52	46	6	48	46	2	31	29	2	92	45	47	55	54	1	28	27	1
chr11	68193913	2.95724e-13	1.68836e-10			Intergenic							11	8	3	70	66	4	18	12	6	40	1	39	35	0	35	42	23	19	51	0	51	71	35	36	11	0	11
chr11	68237425	5.91616e-32	2.19046e-28			Intergenic					68236879	68238878	10	9	1	82	76	6	26	15	11	77	68	9	42	19	23	60	55	5	81	0	81	83	36	47	18	0	18
chr11	68282568	2.82421e-08	7.61145e-06			Intergenic					68281342	68283341	10	5	5	96	9	87	15	6	9	75	16	59	50	11	39	51	21	30	87	42	45	62	25	37	12	6	6
chr11	68335741	4.16011e-07	8.87334e-05			Intergenic			68335507	68336091			29	26	3	147	79	68	36	25	11	103	69	34	63	28	35	99	93	6	155	115	40	96	78	18	23	22	1
chr11	68816083	2.02906e-05	0.00267059			Intergenic			68814653	68816103			15	4	11	107	15	92	30	2	28	61	4	57	35	2	33	39	0	39	47	2	45	54	1	53	10	0	10
chr11	69288471	9.79075e-05	0.00966522			Intergenic			69288266	69288869			11	4	7	62	35	27	14	0	14	24	15	9	27	17	10	51	2	49	27	5	22	24	6	18	18	6	12
chr11	69288474	1.62175e-05	0.00220051			Intergenic			69288266	69288869			11	4	7	62	35	27	14	0	14	24	15	9	27	17	10	51	4	47	27	5	22	24	3	21	18	6	12
chr11	69288487	2.36884e-06	0.000419493			Intergenic			69288266	69288869			11	4	7	62	35	27	14	0	14	24	15	9	27	17	10	51	3	48	27	4	23	24	2	22	18	6	12
chr11	69288491	2.03407e-06	0.000366045			Intergenic			69288266	69288869			11	5	6	62	38	24	14	1	13	24	16	8	27	18	9	51	6	45	27	5	22	24	4	20	18	6	12
chr11	69370056	1.24985e-13	7.47531e-11	NM_001252205	TMTC4	Intron	69364173	69371129					13	13	0	87	87	0	18	7	11	69	66	3	41	41	0	26	24	2	129	61	68	53	44	9	18	12	6
chr11	69395906	1.26851e-13	7.57238e-11	NM_001252205	TMTC4	Intron	69394246	69397579					11	10	1	92	86	6	10	5	5	87	75	12	41	39	2	26	24	2	66	1	65	43	40	3	14	8	6
chr11	69430234	1.48591e-05	0.00204778	NM_001252205	TMTC4	Intron	69425813	69430375			69428313	69430312	27	15	12	204	86	118	34	23	11	114	75	39	66	39	27	85	58	27	151	95	56	115	76	39	21	14	7
chr11	69495723	2.62746e-24	4.95254e-21			Intergenic							23	0	23	149	0	149	31	11	20	81	1	80	53	1	52	63	13	50	97	77	20	62	4	58	12	5	7
chr11	69509302	1.46402e-10	5.77091e-08			Intergenic							12	12	0	78	75	3	46	22	24	66	64	2	52	50	2	63	60	3	90	0	90	79	77	2	18	8	10
chr11	69675522	1.07743e-06	0.0002081			Intergenic							13	11	2	106	100	6	29	14	15	63	52	11	44	40	4	64	61	3	54	0	54	100	88	12	14	5	9
chr11	69761247	4.14639e-10	1.51491e-07			Intergenic							12	11	1	67	56	11	21	9	12	54	53	1	46	45	1	44	40	4	69	0	69	57	47	10	15	6	9
chr11	70341562	1.2733e-06	0.00024232			Intergenic							17	11	6	119	88	31	46	13	33	138	74	64	77	47	30	104	32	72	141	63	78	100	47	53	17	4	13
chr11	71009772	3.56344e-12	1.77607e-09			Intergenic							17	0	17	19	0	19	33	32	1	55	0	55	38	15	23	25	0	25	87	83	4	64	35	29	16	9	7
chr11	71159051	7.85597e-19	8.49102e-16			Intergenic			71159023	71159225			16	15	1	116	107	9	33	12	21	70	62	8	49	16	33	71	67	4	50	19	31	79	32	47	15	0	15
chr11	73106822	3.48097e-06	0.00058806			Intergenic							21	21	0	90	88	2	11	7	4	71	67	4	45	43	2	69	68	1	95	50	45	68	67	1	25	21	4
chr11	73179348	1.18805e-32	4.70697e-29			Intergenic							18	18	0	112	3	109	12	10	2	74	62	12	47	15	32	29	27	2	84	74	10	69	60	9	22	22	0
chr11	73592474	5.28148e-07	0.000110297			Intergenic							17	14	3	109	102	7	65	48	17	61	49	12	68	47	21	96	69	27	125	78	47	126	84	42	18	14	4
chr11	74125134	4.66608e-08	1.21135e-05			Intergenic							20	19	1	72	40	32	21	18	3	67	63	4	41	14	27	61	59	2	86	80	6	68	65	3	28	26	2
chr11	74431526	4.18073e-14	2.64279e-11			Intergenic							13	13	0	108	0	108	29	29	0	60	56	4	44	15	29	19	17	2	60	31	29	44	42	2	11	8	3
chr11	74948947	2.70227e-08	7.30179e-06			Intergenic							12	9	3	82	43	39	23	18	5	71	61	10	44	40	4	40	35	5	87	79	8	55	46	9	15	14	1
chr11	74948948	1.37886e-08	3.94608e-06			Intergenic							20	20	0	96	50	46	12	11	1	79	66	13	33	30	3	48	43	5	76	71	5	59	51	8	13	13	0
chr11	75074888	9.85671e-07	0.000192438			Intergenic							16	12	4	95	45	50	41	37	4	69	56	13	31	23	8	53	28	25	78	64	14	60	57	3	14	13	1
chr11	75437954	7.62908e-05	0.00791833			Intergenic							16	6	10	50	3	47	39	17	22	44	4	40	46	3	43	47	22	25	81	25	56	72	33	39	12	5	7
chr11	75819580	4.80398e-17	4.20574e-14			Intergenic							11	4	7	119	107	12	25	20	5	67	5	62	40	16	24	70	62	8	70	27	43	66	5	61	15	4	11
chr11	75839974	1.83506e-08	5.1278e-06			Intergenic							16	0	16	89	47	42	37	3	34	63	0	63	34	10	24	71	29	42	113	2	111	57	5	52	17	0	17
chr11	75839975	1.35305e-07	3.19462e-05			Intergenic							12	0	12	94	39	55	48	4	44	48	1	47	38	8	30	76	35	41	102	0	102	71	1	70	16	0	16
chr11	75839981	4.99865e-07	0.000105007			Intergenic							16	1	15	89	40	49	37	2	35	63	2	61	34	10	24	71	26	45	113	2	111	57	5	52	17	0	17
chr11	75839982	2.77058e-05	0.00344913			Intergenic							12	0	12	94	45	49	48	3	45	48	4	44	38	8	30	76	39	37	102	2	100	71	9	62	16	1	15
chr11	75839987	4.56292e-14	2.87125e-11			Intergenic							16	2	14	89	54	35	37	4	33	63	5	58	34	10	24	71	28	43	113	1	112	57	4	53	17	0	17
chr11	75839988	1.71363e-08	4.82096e-06			Intergenic							12	0	12	94	50	44	48	4	44	48	6	42	38	9	29	76	37	39	102	0	102	71	7	64	16	1	15
chr11	75839994	6.80133e-05	0.00723358			Intergenic							12	2	10	109	55	54	47	4	43	58	9	49	54	8	46	82	43	39	105	16	89	85	9	76	17	4	13
chr11	75861186	7.6929e-11	3.16583e-08			Intergenic							13	0	13	71	37	34	84	15	69	73	2	71	41	4	37	109	40	69	115	2	113	94	0	94	27	1	26
chr11	75970928	3.383e-13	1.91823e-10			Intergenic							15	14	1	103	42	61	38	14	24	101	83	18	45	24	21	93	36	57	94	92	2	66	62	4	18	17	1
chr11	75970956	1.2588e-11	5.81076e-09			Intergenic							15	3	12	149	98	51	28	14	14	101	9	92	47	22	25	113	75	38	92	15	77	67	5	62	18	1	17
chr11	76003540	3.98251e-18	3.9446e-15			Intergenic			76003528	76003748			16	0	16	110	97	13	41	13	28	69	2	67	42	25	17	85	68	17	68	0	68	61	2	59	16	0	16
chr11	76003541	7.92697e-25	1.5728e-21			Intergenic			76003528	76003748			11	0	11	94	85	9	42	18	24	51	0	51	37	19	18	71	59	12	95	0	95	53	0	53	14	0	14
chr11	76014979	3.24149e-27	7.62298e-24			Intergenic							11	0	11	84	77	7	10	3	7	65	0	65	30	12	18	19	17	2	55	0	55	52	0	52	16	0	16
chr11	76015842	1.01015e-31	3.63199e-28			Intergenic							12	0	12	98	90	8	16	4	12	94	0	94	39	16	23	29	24	5	88	0	88	53	0	53	20	0	20
chr11	76121094	5.5767e-18	5.44557e-15			Intergenic							21	0	21	61	59	2	12	6	6	64	0	64	48	46	2	22	19	3	69	0	69	54	1	53	20	0	20
chr11	76235046	5.89951e-12	2.84137e-09			Intergenic							14	12	2	78	31	47	24	11	13	74	69	5	44	41	3	44	15	29	77	69	8	73	70	3	14	14	0
chr11	76235047	1.93057e-08	5.36694e-06			Intergenic							14	14	0	67	31	36	21	4	17	56	43	13	34	29	5	38	13	25	82	69	13	64	59	5	14	14	0
chr11	76235073	8.21863e-15	5.59624e-12			Intergenic							14	0	14	78	60	18	23	6	17	74	1	73	44	40	4	44	30	14	77	0	77	73	4	69	14	0	14
chr11	76235074	2.67854e-20	3.42117e-17			Intergenic							14	0	14	67	58	9	21	9	12	56	0	56	34	32	2	38	29	9	82	0	82	64	0	64	14	0	14
chr11	76248513	4.414e-28	1.10933e-24			Intergenic			76248422	76248722			11	0	11	121	103	18	12	7	5	15	0	15	26	19	7	24	21	3	70	0	70	34	1	33	12	0	12
chr11	76254373	9.80195e-05	0.00967244			Intergenic			76254372	76254893			12	9	3	90	45	45	22	13	9	51	45	6	12	4	8	47	18	29	64	57	7	56	46	10	13	11	2
chr11	76254400	9.40303e-05	0.00935448			Intergenic			76254372	76254893			12	11	1	90	30	60	23	14	9	52	46	6	13	3	10	47	12	35	64	53	11	56	42	14	13	10	3
chr11	76254493	8.43751e-05	0.00856797			Intergenic			76254372	76254893			12	9	3	83	40	43	26	17	9	37	29	8	10	3	7	27	10	17	35	33	2	46	37	9	11	10	1
chr11	76254494	4.65923e-10	1.69185e-07			Intergenic			76254372	76254893			10	10	0	106	47	59	22	11	11	38	33	5	15	4	11	44	23	21	55	46	9	72	66	6	16	15	1
chr11	76254511	5.39659e-10	1.93698e-07			Intergenic			76254372	76254893			10	7	3	106	42	64	22	11	11	38	25	13	15	3	12	44	20	24	55	41	14	72	61	11	16	15	1
chr11	76254539	4.62769e-05	0.00528752			Intergenic			76254372	76254893			12	10	2	83	29	54	26	14	12	37	30	7	10	4	6	27	10	17	35	30	5	46	32	14	11	10	1
chr11	76254540	3.52348e-09	1.11536e-06			Intergenic			76254372	76254893			10	10	0	106	38	68	22	11	11	38	30	8	15	2	13	44	14	30	55	45	10	72	61	11	16	14	2
chr11	76254556	1.77249e-12	9.2146e-10			Intergenic			76254372	76254893			10	8	2	106	35	71	22	12	10	38	30	8	15	2	13	44	18	26	55	46	9	72	60	12	16	16	0
chr11	76254562	5.58476e-09	1.71463e-06			Intergenic			76254372	76254893			10	10	0	106	42	64	22	16	6	38	30	8	15	2	13	44	21	23	55	48	7	72	62	10	16	14	2
chr11	76254568	4.49766e-08	1.16983e-05			Intergenic			76254372	76254893			10	9	1	105	50	55	22	15	7	38	32	6	15	2	13	44	26	18	55	44	11	72	65	7	16	15	1
chr11	76295828	2.20639e-12	1.1347e-09			Intergenic							24	22	2	190	69	121	72	42	30	75	66	9	43	36	7	157	73	84	114	102	12	51	42	9	30	27	3
chr11	76295829	7.01375e-15	4.81003e-12			Intergenic							14	0	14	168	81	87	45	19	26	76	13	63	37	3	34	104	41	63	81	4	77	81	3	78	14	0	14
chr11	76386697	7.31988e-11	3.01931e-08			Intergenic					76386622	76388621	34	13	21	134	19	115	54	36	18	104	22	82	62	31	31	106	56	50	172	88	84	164	84	80	21	13	8
chr11	76509041	5.12204e-20	6.36567e-17			Intergenic							28	0	28	96	83	13	64	32	32	78	0	78	40	0	40	109	98	11	130	0	130	77	0	77	25	0	25
chr11	76563629	3.63043e-18	3.61602e-15			Intergenic							15	0	15	83	79	4	24	7	17	58	0	58	34	1	33	69	63	6	59	0	59	59	1	58	19	0	19
chr11	76569127	2.71052e-31	9.36667e-28			Intergenic			76569126	76569713			13	0	13	132	121	11	19	11	8	62	0	62	38	31	7	47	40	7	66	0	66	52	1	51	20	0	20
chr11	76569173	1.10223e-28	2.9113e-25			Intergenic			76569126	76569713			13	0	13	132	124	8	18	11	7	62	0	62	38	35	3	47	46	1	66	0	66	52	4	48	20	0	20
chr11	76574818	9.99359e-23	1.62729e-19			Intergenic							31	0	31	109	109	0	75	33	42	72	0	72	50	0	50	129	121	8	117	0	117	81	2	79	35	2	33
chr11	76574819	6.84057e-20	8.41737e-17			Intergenic							17	0	17	70	67	3	40	28	12	48	0	48	38	0	38	70	68	2	80	0	80	52	1	51	17	0	17
chr11	76583355	6.75791e-05	0.00720097			Intergenic					76583294	76585293	10	8	2	117	115	2	28	18	10	84	58	26	55	48	7	44	32	12	88	65	23	86	66	20	22	13	9
chr11	76583356	7.75362e-05	0.00802082			Intergenic					76583294	76585293	15	8	7	49	16	33	46	32	14	81	62	19	64	39	25	66	50	16	124	91	33	93	63	30	25	23	2
chr11	76585155	8.37244e-06	0.00125641			Intergenic					76583294	76585293	16	2	14	62	14	48	90	9	81	94	3	91	50	2	48	104	5	99	142	9	133	72	0	72	26	0	26
chr11	76635195	3.47015e-05	0.00415497			Intergenic							26	23	3	149	101	48	81	74	7	139	127	12	60	51	9	143	115	28	125	119	6	87	76	11	31	30	1
chr11	76635396	6.27914e-21	8.61248e-18			Intergenic							12	10	2	147	66	81	27	19	8	86	84	2	43	41	2	69	46	23	102	100	2	85	77	8	20	20	0
chr11	76647164	8.82088e-06	0.00131467			Intergenic							12	2	10	116	17	99	43	8	35	68	22	46	64	23	41	67	18	49	72	27	45	87	32	55	16	8	8
chr11	76715308	1.84237e-11	8.3345e-09			Intergenic							19	0	19	90	59	31	14	3	11	74	0	74	37	18	19	43	29	14	78	0	78	46	1	45	15	0	15
chr11	76734212	2.34718e-29	6.62129e-26			Intergenic							16	0	16	121	115	6	22	8	14	61	0	61	37	34	3	43	40	3	69	1	68	73	2	71	12	0	12
chr11	76761997	4.83168e-05	0.00547533			Intergenic					76760704	76762703	18	0	18	69	34	35	23	9	14	62	1	61	45	18	27	33	33	0	47	0	47	65	1	64	11	0	11
chr11	76799041	1.44503e-05	0.00200009			Intergenic							18	12	6	88	76	12	37	26	11	73	51	22	42	34	8	100	66	34	107	57	50	78	48	30	17	10	7
chr11	76830265	1.32736e-06	0.000251261			Intergenic					76829885	76830576	16	0	16	65	42	23	51	32	19	58	0	58	38	37	1	117	110	7	76	0	76	56	1	55	16	0	16
chr11	76962769	1.13185e-05	0.00162689			Intergenic			76962747	76963743			13	12	1	81	75	6	16	12	4	66	59	7	22	12	10	21	11	10	58	37	21	33	26	7	15	10	5
chr11	76962790	3.35045e-05	0.00403222			Intergenic			76962747	76963743			13	13	0	83	74	9	16	12	4	66	62	4	22	11	11	21	15	6	59	39	20	33	25	8	15	10	5
chr11	77043268	3.06189e-05	0.00375098			Intergenic					77041960	77043959	17	0	17	112	2	110	16	3	13	57	0	57	30	20	10	56	20	36	66	0	66	74	22	52	18	0	18
chr11	77115692	1.39177e-05	0.00193477			Intergenic			77115567	77115988			27	1	26	107	5	102	60	6	54	75	6	69	71	31	40	106	19	87	128	7	121	97	37	60	20	1	19
chr11	77115925	1.18417e-07	2.82918e-05			Intergenic			77115567	77115988			14	6	8	125	56	69	14	13	1	64	0	64	46	43	3	38	15	23	56	25	31	74	70	4	13	6	7
chr11	77115938	1.07646e-06	0.000207944			Intergenic			77115567	77115988			15	14	1	127	119	8	35	14	21	71	56	15	54	43	11	75	39	36	83	47	36	100	72	28	18	12	6
chr11	77124760	9.59105e-05	0.00950783			Intergenic					77123254	77125253	11	9	2	144	118	26	35	22	13	95	64	31	66	34	32	60	40	20	110	76	34	100	53	47	18	12	6
chr11	77126194	1.51734e-10	5.96411e-08			Intergenic			77126157	77126525			10	5	5	93	43	50	26	17	9	66	0	66	44	37	7	41	40	1	60	35	25	62	57	5	15	8	7
chr11	77147342	3.12866e-06	0.000536114			Intergenic							16	13	3	42	37	5	29	14	15	84	72	12	29	18	11	78	70	8	76	39	37	61	29	32	11	6	5
chr11	77159332	2.38087e-06	0.000421316			Intergenic					77158232	77160231	22	7	15	125	78	47	27	10	17	109	73	36	52	29	23	101	39	62	147	54	93	109	39	70	27	11	16
chr11	77159431	7.04318e-05	0.00744373			Intergenic					77158232	77160231	11	0	11	58	0	58	25	10	15	68	0	68	31	17	14	51	24	27	54	0	54	63	26	37	13	0	13
chr11	77159432	1.14731e-06	0.000220263			Intergenic					77158232	77160231	25	1	24	60	3	57	26	10	16	76	0	76	33	5	28	64	35	29	80	0	80	59	34	25	18	0	18
chr11	77167340	1.18649e-05	0.00169174			Intergenic			77167223	77168424			17	8	9	78	36	42	22	14	8	63	2	61	36	26	10	76	68	8	59	21	38	64	53	11	15	6	9
chr11	77225655	4.15736e-05	0.00483765	NM_001243422	NAXD	Intron	77221301	77226635	77224906	77226029			21	13	8	97	59	38	25	21	4	77	27	50	10	10	0	62	38	24	97	69	28	60	54	6	18	16	2
chr11	77231490	3.94916e-05	0.00463483			Intergenic			77226361	77234632			16	10	6	123	71	52	60	22	38	51	44	7	81	39	42	102	36	66	84	37	47	159	59	100	17	7	10
chr11	77241814	3.08934e-06	0.000530399			Intergenic			77241535	77242371			11	5	6	119	67	52	26	21	5	94	50	44	76	34	42	25	22	3	75	66	9	67	50	17	13	11	2
chr11	77265137	4.54204e-05	0.0052083			Intergenic			77265002	77265588			17	1	16	123	14	109	46	2	44	102	2	100	66	1	65	113	4	109	125	0	125	85	2	83	16	0	16
chr11	77279670	1.07089e-05	0.0015511			Intergenic							25	10	15	108	61	47	41	15	26	104	71	33	61	21	40	130	56	74	101	34	67	104	31	73	24	9	15
chr11	77442772	9.83571e-05	0.00969115			Intergenic			77442384	77442806			30	19	11	110	99	11	77	39	38	89	46	43	46	28	18	151	66	85	114	53	61	94	62	32	26	16	10
chr11	77450004	7.7721e-07	0.000155899			Intergenic							25	13	12	93	23	70	43	37	6	85	35	50	44	1	43	74	57	17	81	52	29	66	46	20	24	13	11
chr11	77491227	3.2335e-07	7.04115e-05			Intergenic			77488873	77493328			17	6	11	60	49	11	45	27	18	48	34	14	27	24	3	59	21	38	95	42	53	94	40	54	11	3	8
chr11	77506680	3.86083e-05	0.00454661			Intergenic			77502925	77508952			31	18	13	119	104	15	36	13	23	134	110	24	91	53	38	93	46	47	128	91	37	91	52	39	24	10	14
chr11	77529797	2.84865e-05	0.00353148			Intergenic			77525697	77535180			30	16	14	136	54	82	43	37	6	115	66	49	59	42	17	75	62	13	127	83	44	76	54	22	26	14	12
chr11	77533493	6.32144e-06	0.000985235			Intergenic			77525697	77535180			24	24	0	96	93	3	34	31	3	108	104	4	36	34	2	67	61	6	125	121	4	71	56	15	23	16	7
chr11	77544328	1.50919e-06	0.000280796			Intergenic			77544096	77546578			21	7	14	167	69	98	60	8	52	130	32	98	66	27	39	161	37	124	140	24	116	119	21	98	45	7	38
chr11	77551966	7.63142e-05	0.00791962			Intergenic					77551582	77553581	16	16	0	172	156	16	29	25	4	87	72	15	79	38	41	75	65	10	79	65	14	81	55	26	15	13	2
chr11	77577112	1.01962e-05	0.00148619			Intergenic			77576187	77577216			29	13	16	123	93	30	44	25	19	124	87	37	35	2	33	37	2	35	131	82	49	90	31	59	22	14	8
chr11	77578086	3.1944e-05	0.00388159			Intergenic			77577819	77578655			12	12	0	42	40	2	15	8	7	46	42	4	19	0	19	36	0	36	22	21	1	31	17	14	10	10	0
chr11	77584422	9.08389e-05	0.00909232			Intergenic					77583744	77584589	36	15	21	207	111	96	95	46	49	170	69	101	70	23	47	165	49	116	221	89	132	113	42	71	37	11	26
chr11	77595016	2.10015e-05	0.0027499			Intergenic			77594630	77595471			11	6	5	56	1	55	33	25	8	64	8	56	26	1	25	46	32	14	53	28	25	65	24	41	16	10	6
chr11	77628508	7.61826e-07	0.000153109			Intergenic							20	8	12	136	110	26	49	22	27	97	69	28	46	18	28	88	36	52	108	53	55	115	59	56	13	5	8
chr11	77630247	3.41653e-08	9.07603e-06			Intergenic					77628558	77630557	13	5	8	102	30	72	23	17	6	86	0	86	45	31	14	41	32	9	78	38	40	50	37	13	15	5	10
chr11	77703070	2.61002e-06	0.000456935			Intergenic			77702635	77704107			15	15	0	85	76	9	17	9	8	58	55	3	38	36	2	35	15	20	58	50	8	55	27	28	16	14	2
chr11	77704026	7.89823e-05	0.00813793			Intergenic			77702635	77704107			19	8	11	88	54	34	28	6	22	104	70	34	51	32	19	56	18	38	111	41	70	64	19	45	22	11	11
chr11	77704041	7.6172e-06	0.00115718			Intergenic			77702635	77704107			19	7	12	89	61	28	28	7	21	104	70	34	51	34	17	56	18	38	111	42	69	65	19	46	22	12	10
chr11	77704071	2.43907e-05	0.00311339			Intergenic			77702635	77704107			19	8	11	87	61	26	29	7	22	103	66	37	51	33	18	56	22	34	109	43	66	65	21	44	22	11	11
chr11	77728458	2.52701e-10	9.58713e-08			Intergenic					77727770	77730312	13	8	5	71	20	51	20	12	8	60	34	26	28	13	15	57	41	16	101	74	27	79	65	14	18	10	8
chr11	77734041	1.11958e-05	0.00161129			Intergenic			77733917	77734153			26	19	7	146	47	99	50	39	11	115	59	56	39	18	21	108	70	38	123	75	48	132	82	50	26	21	5
chr11	77734042	5.61862e-05	0.00619498			Intergenic			77733917	77734153			32	13	19	122	86	36	43	20	23	106	57	49	49	28	21	97	49	48	157	68	89	118	54	64	23	5	18
chr11	77762505	1.29819e-10	5.16306e-08			Intergenic					77762293	77765381	22	9	13	125	11	114	37	26	11	94	31	63	31	9	22	56	30	26	95	54	41	77	42	35	29	13	16
chr11	77819471	6.67904e-05	0.00713465			Intergenic			77817247	77824787			14	6	8	78	53	25	48	14	34	89	50	39	30	29	1	102	27	75	104	29	75	83	43	40	14	2	12
chr11	77819480	1.64483e-06	0.000302922			Intergenic			77817247	77824787			14	10	4	90	35	55	37	32	5	85	45	40	16	3	13	88	74	14	95	71	24	50	40	10	15	8	7
chr11	77889182	1.25767e-05	0.00177937			Intergenic					77888223	77890597	34	16	18	221	126	95	66	39	27	156	76	80	84	41	43	148	59	89	212	89	123	154	62	92	26	8	18
chr11	77896704	2.00415e-07	4.57142e-05			Intergenic					77896404	77897445	12	8	4	111	70	41	49	8	41	115	85	30	20	8	12	84	20	64	105	34	71	91	26	65	25	16	9
chr11	77898795	8.07155e-05	0.00827471			Intergenic			77898762	77899253			14	13	1	85	68	17	34	27	7	95	85	10	40	32	8	80	75	5	81	77	4	73	72	1	17	15	2
chr11	77912838	2.00725e-05	0.00264664			Intergenic			77912561	77912841			22	11	11	69	33	36	50	47	3	96	0	96	25	0	25	93	49	44	93	51	42	93	78	15	19	9	10
chr11	77920511	1.8926e-06	0.000343569			Intergenic			77919598	77920532			15	14	1	168	157	11	55	51	4	77	71	6	52	47	5	121	78	43	87	82	5	98	72	26	13	12	1
chr11	78017028	3.00984e-10	1.1268e-07			Intergenic			78016680	78017173			16	5	11	93	54	39	36	5	31	86	52	34	42	24	18	68	5	63	76	17	59	62	11	51	16	3	13
chr11	78102633	2.09472e-07	4.75446e-05			Intergenic			78102214	78103055			17	17	0	52	50	2	38	36	2	49	47	2	30	29	1	39	19	20	61	31	30	50	47	3	12	10	2
chr11	78102742	6.07969e-08	1.54229e-05			Intergenic			78102214	78103055			34	29	5	127	95	32	79	47	32	109	83	26	60	39	21	108	47	61	115	56	59	117	68	49	26	13	13
chr11	78138307	1.98368e-12	1.0244e-09			Intergenic			78138140	78138353			37	0	37	122	0	122	56	0	56	100	2	98	57	35	22	104	40	64	118	42	76	77	2	75	37	9	28
chr11	78160452	7.7573e-07	0.000155656			Intergenic			78160209	78160594			28	14	14	124	24	100	39	29	10	123	25	98	62	6	56	96	63	33	114	60	54	84	47	37	30	9	21
chr11	78162968	6.98304e-05	0.00739184			Intergenic			78162136	78163097			15	11	4	135	91	44	43	17	26	74	59	15	36	27	9	85	27	58	75	54	21	81	23	58	15	12	3
chr11	78177482	3.39963e-19	3.86236e-16			Intergenic			78174125	78177549			22	0	22	92	1	91	54	24	30	84	0	84	23	20	3	82	75	7	82	35	47	46	19	27	21	8	13
chr11	78177483	1.20387e-17	1.13031e-14			Intergenic			78174125	78177549			21	0	21	95	0	95	61	27	34	54	0	54	26	24	2	85	75	10	68	22	46	67	35	32	15	4	11
chr11	78183708	4.56897e-16	3.59292e-13			Intergenic							13	13	0	102	102	0	26	26	0	91	84	7	37	37	0	76	36	40	117	61	56	79	76	3	12	5	7
chr11	78183709	3.21041e-30	9.9104e-27			Intergenic							35	35	0	124	121	3	60	59	1	152	140	12	67	62	5	115	63	52	182	88	94	103	100	3	37	10	27
chr11	78193726	2.05996e-09	6.76169e-07			Intergenic			78193627	78193835			16	16	0	88	86	2	16	12	4	85	77	8	38	36	2	70	38	32	86	43	43	82	80	2	23	11	12
chr11	78193727	2.57398e-06	0.000451006			Intergenic			78193627	78193835			17	16	1	69	66	3	32	28	4	92	86	6	35	34	1	63	27	36	92	55	37	84	82	2	20	12	8
chr11	78200601	9.93367e-05	0.00976833			Intergenic			78199005	78204915			23	21	2	153	142	11	53	21	32	119	113	6	38	38	0	90	51	39	87	84	3	98	52	46	25	25	0
chr11	78201558	2.83411e-07	6.26133e-05			Intergenic			78199005	78204915			19	12	7	75	24	51	35	27	8	72	22	50	22	3	19	76	55	21	94	59	35	57	39	18	14	14	0
chr11	78215912	2.04548e-05	0.00268765			Intergenic			78215448	78216236			14	3	11	114	33	81	34	1	33	89	32	57	49	10	39	45	2	43	65	3	62	52	6	46	10	1	9
chr11	78226400	9.25405e-06	0.00136906			Intergenic					78226276	78228275	24	23	1	79	75	4	39	18	21	67	61	6	29	29	0	53	15	38	88	82	6	77	38	39	21	18	3
chr11	78226830	3.19017e-14	2.04467e-11			Intergenic					78226276	78228275	27	27	0	72	72	0	49	49	0	82	80	2	27	0	27	85	47	38	71	34	37	59	58	1	12	5	7
chr11	78226831	4.55748e-16	3.58615e-13			Intergenic					78226276	78228275	19	19	0	100	93	7	65	61	4	103	98	5	47	0	47	105	54	51	115	50	65	70	69	1	33	13	20
chr11	78253695	2.88912e-22	4.52099e-19			Intergenic					78252477	78254476	12	0	12	99	2	97	22	8	14	85	0	85	47	0	47	57	52	5	77	25	52	88	41	47	11	4	7
chr11	78259980	1.58356e-08	4.47934e-06			Intergenic			78259645	78260631			10	2	8	78	40	38	30	7	23	71	21	50	64	37	27	70	11	59	85	13	72	66	8	58	21	3	18
chr11	78260687	8.40986e-05	0.00854408			Intergenic					78260632	78262766	28	10	18	149	89	60	12	7	5	204	95	109	92	43	49	47	22	25	99	89	10	97	63	34	35	21	14
chr11	78288150	7.2122e-07	0.00014601			Intergenic					78287687	78289686	10	5	5	129	76	53	31	7	24	95	42	53	60	27	33	77	17	60	87	23	64	66	20	46	11	5	6
chr11	78288151	6.86446e-05	0.00728766			Intergenic					78287687	78289686	25	14	11	171	61	110	33	23	10	127	57	70	63	26	37	78	63	15	132	82	50	126	65	61	19	11	8
chr11	78303877	8.8699e-06	0.00132087			Intergenic			78303361	78305169			18	3	15	149	14	135	47	1	46	104	9	95	69	34	35	105	40	65	105	29	76	73	8	65	18	6	12
chr11	78308890	1.04362e-07	2.52786e-05			Intergenic							19	13	6	81	69	12	22	8	14	86	73	13	31	22	9	25	7	18	50	26	24	47	22	25	11	5	6
chr11	78308891	4.43545e-06	0.000724038			Intergenic							28	11	17	115	25	90	20	11	9	104	15	89	48	5	43	40	25	15	73	36	37	72	32	40	15	8	7
chr11	78315339	6.53458e-18	6.34605e-15			Intergenic					78315275	78317274	12	0	12	94	4	90	44	2	42	106	2	104	41	1	40	139	56	83	126	49	77	70	2	68	27	19	8
chr11	78315512	5.66205e-11	2.37326e-08			Intergenic					78315275	78317274	13	1	12	96	5	91	26	3	23	49	2	47	34	6	28	95	45	50	117	58	59	73	8	65	29	12	17
chr11	78316850	1.47542e-06	0.000275681			Intergenic					78315275	78317274	17	2	15	125	4	121	24	4	20	80	6	74	63	35	28	65	27	38	122	37	85	55	4	51	27	8	19
chr11	78324176	1.91568e-06	0.000347301			Intergenic			78324132	78324973			30	29	1	101	99	2	62	58	4	111	106	5	45	43	2	152	115	37	156	115	41	81	80	1	47	40	7
chr11	78324177	8.27585e-07	0.000164728			Intergenic			78324132	78324973			17	2	15	70	1	69	42	1	41	64	4	60	29	1	28	104	32	72	124	33	91	80	10	70	35	8	27
chr11	78324415	1.68302e-19	1.98837e-16			Intergenic			78324132	78324973			19	18	1	89	88	1	27	26	1	49	48	1	11	11	0	104	54	50	83	36	47	26	25	1	27	15	12
chr11	78334905	2.226e-13	1.28922e-10			Intergenic			78333241	78335172			12	0	12	86	0	86	30	0	30	57	0	57	27	0	27	54	23	31	57	38	19	72	0	72	14	7	7
chr11	78338950	1.02743e-07	2.4929e-05			Intergenic			78338568	78340595			19	0	19	105	0	105	63	0	63	94	0	94	45	0	45	84	19	65	116	26	90	67	0	67	16	0	16
chr11	78338951	2.72991e-06	0.000474784			Intergenic			78338568	78340595			16	0	16	103	2	101	52	0	52	83	4	79	47	0	47	84	23	61	95	23	72	61	0	61	22	3	19
chr11	78339537	1.83714e-05	0.00245276			Intergenic			78338568	78340595			13	11	2	85	77	8	59	54	5	85	73	12	41	37	4	85	71	14	70	43	27	69	52	17	10	8	2
chr11	78348358	4.98057e-12	2.42982e-09			Intergenic			78348186	78348473			12	0	12	98	0	98	24	0	24	64	0	64	40	40	0	87	48	39	86	39	47	55	0	55	14	7	7
chr11	78348388	8.71585e-14	5.30734e-11			Intergenic			78348186	78348473			12	0	12	98	4	94	24	1	23	64	2	62	40	2	38	120	40	80	132	50	82	55	6	49	24	11	13
chr11	78377320	1.16985e-26	2.63649e-23			Intergenic			78377233	78379078			15	0	15	76	0	76	18	6	12	55	0	55	39	37	2	38	32	6	67	40	27	66	41	25	10	5	5
chr11	78398047	5.43628e-05	0.00602384			Intergenic			78397415	78399809			18	3	15	93	56	37	39	2	37	83	36	47	27	10	17	55	10	45	91	22	69	61	20	41	23	2	21
chr11	78398056	6.51799e-05	0.00699505			Intergenic			78397415	78399809			18	2	16	93	56	37	39	2	37	83	34	49	27	11	16	55	7	48	91	21	70	61	19	42	23	3	20
chr11	78398067	5.44517e-05	0.00603154			Intergenic			78397415	78399809			18	2	16	93	53	40	39	2	37	83	32	51	27	11	16	55	4	51	91	19	72	61	18	43	23	3	20
chr11	78398069	6.66379e-05	0.00712234			Intergenic			78397415	78399809			18	3	15	93	56	37	39	2	37	83	38	45	27	11	16	55	7	48	91	21	70	61	20	41	23	4	19
chr11	78398083	7.8705e-05	0.00811676			Intergenic			78397415	78399809			18	3	15	93	55	38	39	2	37	83	41	42	27	11	16	54	9	45	91	22	69	61	20	41	23	3	20
chr11	78398753	2.10931e-05	0.00276073			Intergenic			78397415	78399809			18	0	18	98	6	92	26	2	24	80	3	77	41	1	40	102	31	71	86	16	70	81	13	68	15	2	13
chr11	78411911	1.37251e-30	4.40069e-27			Intergenic			78411581	78412760			26	0	26	97	1	96	28	15	13	105	1	104	32	28	4	98	93	5	113	57	56	88	43	45	20	12	8
chr11	78411912	1.88426e-24	3.59526e-21			Intergenic			78411581	78412760			16	0	16	102	0	102	22	11	11	114	0	114	27	23	4	91	84	7	119	52	67	64	28	36	23	8	15
chr11	78421882	9.41348e-25	1.85004e-21			Intergenic					78420908	78423745	17	0	17	61	2	59	12	2	10	78	1	77	24	21	3	54	54	0	64	28	36	62	35	27	10	7	3
chr11	78421883	2.63944e-21	3.73558e-18			Intergenic					78420908	78423745	11	0	11	76	0	76	23	14	9	97	1	96	40	38	2	72	67	5	92	45	47	61	30	31	30	17	13
chr11	78422582	8.1828e-13	4.42022e-10			Intergenic					78420908	78423745	15	0	15	101	2	99	27	5	22	58	0	58	48	45	3	33	27	6	49	17	32	59	16	43	10	5	5
chr11	78457732	5.7277e-05	0.00629907			Intergenic			78456090	78458114			15	11	4	73	48	25	18	12	6	64	46	18	26	18	8	39	30	9	37	33	4	51	47	4	18	16	2
chr11	78462512	2.92853e-05	0.00361753			Intergenic			78462100	78463121			18	10	8	94	11	83	43	35	8	90	45	45	24	2	22	116	87	29	89	48	41	74	36	38	30	16	14
chr11	78476020	4.7864e-06	0.000773914			Intergenic					78475878	78476672	13	12	1	73	34	39	25	13	12	93	62	31	48	23	25	57	40	17	117	100	17	120	87	33	19	16	3
chr11	78488101	5.79272e-05	0.00635877			Intergenic					78485949	78488674	20	10	10	72	50	22	56	15	41	115	55	60	13	0	13	106	25	81	145	56	89	117	42	75	18	4	14
chr11	78496490	4.32757e-05	0.00500389			Intergenic							30	3	27	117	10	107	54	29	25	116	11	105	42	0	42	113	50	63	121	18	103	118	49	69	25	3	22
chr11	78511210	3.49816e-05	0.00418327			Intergenic					78509874	78511873	33	16	17	250	133	117	69	35	34	195	103	92	82	43	39	151	64	87	193	73	120	176	63	113	37	18	19
chr11	78520168	1.64568e-05	0.00222896			Intergenic					78520138	78523550	26	6	20	92	13	79	25	9	16	119	18	101	44	5	39	72	17	55	117	37	80	108	44	64	23	6	17
chr11	78520223	3.59471e-05	0.00428219			Intergenic					78520138	78523550	25	11	14	72	16	56	24	18	6	85	15	70	57	20	37	48	23	25	98	46	52	99	61	38	23	7	16
chr11	78538620	2.85496e-05	0.00353825			Intergenic			78534516	78538856			16	9	7	99	63	36	47	23	24	114	48	66	51	27	24	95	22	73	111	43	68	71	26	45	32	14	18
chr11	78538669	2.20474e-05	0.00286518			Intergenic			78534516	78538856			21	6	15	202	47	155	81	29	52	190	77	113	25	19	6	147	69	78	149	67	82	130	46	84	39	22	17
chr11	78618943	8.89336e-06	0.00132389			Intergenic					78617773	78620937	24	11	13	86	74	12	53	28	25	91	73	18	53	46	7	105	44	61	122	66	56	116	66	50	17	8	9
chr11	78630915	3.29164e-06	0.000559419			Intergenic					78629969	78632789	16	15	1	90	89	1	19	15	4	96	92	4	48	47	1	61	44	17	99	91	8	75	55	20	23	20	3
chr11	78633148	2.88145e-05	0.00356788			Intergenic			78632790	78633308			14	6	8	98	6	92	52	26	26	49	5	44	39	1	38	79	39	40	104	38	66	85	26	59	13	8	5
chr11	78655157	4.84035e-05	0.00548408			Intergenic							17	9	8	162	87	75	22	5	17	163	83	80	51	16	35	56	14	42	99	38	61	92	31	61	20	6	14
chr11	78666389	6.35013e-11	2.64032e-08			Intergenic							14	12	2	100	90	10	43	30	13	68	48	20	41	40	1	101	55	46	95	58	37	120	64	56	16	9	7
chr11	78707305	2.59925e-05	0.0032775			Intergenic					78706511	78707844	27	10	17	134	34	100	74	53	21	139	58	81	113	34	79	127	80	47	157	88	69	155	72	83	26	19	7
chr11	78763433	3.94775e-06	0.000653951			Intergenic					78762111	78764546	21	21	0	89	83	6	49	19	30	61	58	3	35	33	2	99	41	58	86	78	8	73	30	43	23	21	2
chr11	78763434	4.86253e-05	0.00550378			Intergenic					78762111	78764546	20	18	2	79	74	5	37	17	20	82	77	5	25	24	1	83	42	41	102	99	3	81	32	49	27	26	1
chr11	78771584	2.92566e-29	8.1974e-26			Intergenic			78764547	78774083			10	0	10	99	42	57	22	21	1	105	1	104	29	22	7	72	61	11	76	65	11	81	80	1	16	9	7
chr11	78771585	7.23625e-23	1.2019e-19			Intergenic			78764547	78774083			13	0	13	115	58	57	26	25	1	104	0	104	42	36	6	59	58	1	75	70	5	59	56	3	19	10	9
chr12	222460	1.40921e-06	0.000265062			Intergenic					222080	222976	27	17	10	124	100	24	50	11	39	120	80	40	48	29	19	85	32	53	141	67	74	109	47	62	41	24	17
chr12	229398	7.58441e-07	0.000152505			Intergenic			227700	230023			21	9	12	54	0	54	37	12	25	138	52	86	45	17	28	12	0	12	150	74	76	130	65	65	34	13	21
chr12	230740	1.88949e-05	0.0025116			Intergenic					230024	232935	28	11	17	115	110	5	60	56	4	119	48	71	47	43	4	77	73	4	110	104	6	76	30	46	25	0	25
chr12	232491	8.08323e-07	0.000161414			Intergenic					230024	232935	21	12	9	109	89	20	83	43	40	109	63	46	49	26	23	113	66	47	143	65	78	130	55	75	32	19	13
chr12	235770	8.32892e-32	3.02969e-28			Intergenic			235504	236279			16	15	1	121	4	117	24	9	15	78	29	49	37	18	19	41	0	41	72	69	3	54	47	7	15	14	1
chr12	235771	1.2123e-37	7.57867e-34			Intergenic			235504	236279			18	18	0	156	3	153	31	9	22	102	51	51	42	24	18	70	0	70	77	68	9	80	75	5	15	14	1
chr12	235806	8.69135e-05	0.00877844			Intergenic			235504	236279			16	16	0	121	121	0	24	24	0	78	76	2	37	37	0	41	38	3	72	66	6	54	51	3	15	13	2
chr12	237334	3.59059e-22	5.5627e-19			Intergenic					236280	240109	12	12	0	85	2	83	10	4	6	70	19	51	48	18	30	39	0	39	64	58	6	48	37	11	12	11	1
chr12	253437	5.47657e-07	0.000113855			Intergenic					253136	254758	17	6	11	64	61	3	17	15	2	71	70	1	22	1	21	46	45	1	89	2	87	65	58	7	15	13	2
chr12	272770	3.9008e-10	1.43403e-07			Intergenic					270804	272803	14	4	10	105	9	96	14	9	5	95	24	71	38	1	37	30	23	7	64	23	41	64	31	33	19	11	8
chr12	292870	7.86945e-22	1.17105e-18			Intergenic					292841	295418	21	0	21	68	64	4	31	18	13	74	32	42	37	14	23	73	59	14	68	0	68	62	0	62	21	0	21
chr12	292871	2.29218e-21	3.25893e-18			Intergenic					292841	295418	15	0	15	98	74	24	59	36	23	99	54	45	40	22	18	109	97	12	95	1	94	69	0	69	14	0	14
chr12	292905	1.43474e-20	1.89881e-17			Intergenic					292841	295418	20	0	20	68	66	2	31	15	16	74	34	40	37	15	22	73	70	3	68	0	68	62	0	62	21	0	21
chr12	292906	7.63812e-32	2.803e-28			Intergenic					292841	295418	15	0	15	98	96	2	59	36	23	99	55	44	39	23	16	109	105	4	95	2	93	69	1	68	14	0	14
chr12	298861	5.43547e-06	0.000864514			Intergenic			298503	299048			20	12	8	201	107	94	61	59	2	166	92	74	38	25	13	128	94	34	105	102	3	86	61	25	36	20	16
chr12	298862	3.19841e-06	0.000546485			Intergenic			298503	299048			31	12	19	197	120	77	43	11	32	179	93	86	53	18	35	132	46	86	68	10	58	112	36	76	46	27	19
chr12	306523	4.7436e-05	0.00539211			Intergenic			306290	306612			25	1	24	119	16	103	78	6	72	139	13	126	70	17	53	122	14	108	128	21	107	114	39	75	31	3	28
chr12	310671	1.32942e-08	3.81601e-06			Intergenic			309421	311949			23	15	8	122	46	76	35	25	10	86	41	45	61	32	29	109	81	28	187	142	45	114	71	43	14	11	3
chr12	310714	6.75713e-09	2.0448e-06			Intergenic			309421	311949			16	6	10	46	43	3	22	12	10	38	38	0	24	11	13	53	52	1	58	0	58	49	14	35	15	15	0
chr12	320104	1.57691e-09	5.27492e-07			Intergenic			317530	320924			33	12	21	114	15	99	24	13	11	136	40	96	66	26	40	33	9	24	129	70	59	83	46	37	23	8	15
chr12	320105	7.34938e-05	0.00769673			Intergenic			317530	320924			18	7	11	97	69	28	21	7	14	97	52	45	64	31	33	19	14	5	127	51	76	105	42	63	32	13	19
chr12	324972	5.01426e-06	0.000806979			Intergenic			324320	345731			18	13	5	105	51	54	22	16	6	53	21	32	43	21	22	80	61	19	66	48	18	41	32	9	14	13	1
chr12	328247	1.63653e-21	2.36185e-18	NM_001244105	TBCD	Intron	327250	329839	324320	345731			13	0	13	90	84	6	16	7	9	58	29	29	22	12	10	51	49	2	57	0	57	35	2	33	19	0	19
chr12	330038	8.39775e-05	0.00853407	NM_001244105	TBCD	Intron	329925	331634	324320	345731			16	2	14	180	77	103	62	19	43	145	41	104	56	17	39	120	57	63	97	16	81	63	7	56	15	1	14
chr12	330039	1.63035e-05	0.00221035	NM_001244105	TBCD	Intron	329925	331634	324320	345731			17	16	1	200	106	94	53	29	24	126	75	51	65	36	29	131	60	71	88	70	18	81	71	10	15	13	2
chr12	330092	3.4677e-09	1.09854e-06	NM_001244105	TBCD	Intron	329925	331634	324320	345731			26	25	1	149	76	73	42	24	18	125	78	47	42	28	14	137	77	60	100	90	10	64	62	2	13	12	1
chr12	330134	4.76785e-21	6.58314e-18	NM_001244105	TBCD	Intron	329925	331634	324320	345731			25	0	25	78	75	3	28	14	14	89	42	47	26	13	13	80	75	5	97	0	97	62	2	60	14	0	14
chr12	331777	2.69284e-31	9.33148e-28	NM_001244105	TBCD	Intron	331742	332618	324320	345731			20	0	20	101	95	6	58	40	18	128	66	62	40	25	15	109	104	5	116	2	114	71	4	67	20	0	20
chr12	331778	2.07098e-24	3.93943e-21	NM_001244105	TBCD	Intron	331742	332618	324320	345731			19	0	19	84	79	5	31	15	16	120	53	67	36	22	14	79	79	0	109	0	109	59	0	59	14	0	14
chr12	331806	1.70823e-30	5.38003e-27	NM_001244105	TBCD	Intron	331742	332618	324320	345731			20	19	1	100	2	98	57	16	41	127	57	70	40	14	26	109	1	108	116	109	7	71	62	9	20	20	0
chr12	331807	2.93123e-25	6.03738e-22	NM_001244105	TBCD	Intron	331742	332618	324320	345731			19	19	0	83	5	78	31	15	16	118	61	57	36	14	22	78	3	75	109	108	1	59	58	1	14	14	0
chr12	336230	9.91534e-06	0.00144982	NM_001244105	TBCD	Intron	334568	336378	324320	345731			14	9	5	118	106	12	37	32	5	72	59	13	40	31	9	74	63	11	85	50	35	79	57	22	10	5	5
chr12	336707	6.64025e-05	0.0071048	NM_001244105	TBCD	Intron	336501	337182	324320	345731			13	0	13	187	50	137	45	5	40	105	27	78	66	7	59	140	33	107	68	1	67	55	2	53	14	1	13
chr12	340105	1.47686e-06	0.000275909	NM_001244105	TBCD	Intron	339488	340554	324320	345731			16	16	0	231	171	60	81	57	24	145	102	43	50	40	10	150	105	45	99	96	3	104	101	3	14	12	2
chr12	343375	4.55879e-05	0.00522328	NM_001244105	TBCD	Exon	343361	343437	324320	345731			17	9	8	182	103	79	26	7	19	115	43	72	82	49	33	58	14	44	86	24	62	74	24	50	26	13	13
chr12	350776	5.78338e-07	0.000119574	NM_001244105	TBCD	Intron	347518	350880	350586	351442			11	6	5	74	68	6	33	32	1	82	79	3	41	16	25	54	50	4	57	0	57	55	51	4	14	13	1
chr12	353109	1.18572e-27	2.90943e-24	NM_001244105	TBCD	Intron	351798	353142	352832	354284			15	0	15	90	88	2	38	18	20	114	55	59	42	23	19	98	94	4	86	0	86	68	0	68	16	0	16
chr12	353110	6.54868e-25	1.30978e-21	NM_001244105	TBCD	Intron	351798	353142	352832	354284			11	0	11	96	91	5	33	16	17	85	34	51	27	15	12	71	71	0	54	0	54	61	0	61	17	0	17
chr12	353166	3.30796e-41	2.89806e-37	NM_001244105	TBCD	Exon	353143	353260	352832	354284			16	0	16	116	112	4	27	8	19	110	49	61	30	17	13	50	49	1	88	0	88	92	2	90	23	0	23
chr12	353254	6.51199e-05	0.00699042	NM_001244105	TBCD	Exon	353143	353260	352832	354284			13	13	0	81	80	1	20	20	0	97	92	5	26	26	0	59	57	2	103	100	3	78	64	14	16	14	2
chr12	353976	1.49577e-28	3.89288e-25	NM_001244105	TBCD	Intron	353873	356716	352832	354284			11	0	11	115	106	9	18	8	10	63	23	40	48	21	27	41	39	2	56	2	54	46	0	46	16	0	16
chr12	354212	6.92036e-17	5.92922e-14	NM_001244105	TBCD	Intron	353873	356716	352832	354284			11	0	11	69	54	15	25	10	15	53	20	33	32	17	15	72	61	11	75	0	75	57	0	57	16	0	16
chr12	365689	2.87477e-31	9.90676e-28	NM_001244105	TBCD	Intron	364057	367048	363924	366391			10	0	10	93	84	9	44	21	23	76	36	40	39	18	21	55	54	1	82	0	82	79	2	77	12	0	12
chr12	365690	4.51551e-31	1.51415e-27	NM_001244105	TBCD	Intron	364057	367048	363924	366391			19	0	19	119	116	3	40	20	20	90	41	49	40	22	18	69	66	3	69	0	69	69	1	68	15	0	15
chr12	366070	2.63004e-06	0.000459961	NM_001244105	TBCD	Intron	364057	367048	363924	366391			26	25	1	173	106	67	52	47	5	114	93	21	61	48	13	147	88	59	108	103	5	60	60	0	26	25	1
chr12	369246	9.73799e-06	0.00142775	NM_001244105	TBCD	Intron	367079	370282	369214	371816			10	9	1	78	76	2	15	11	4	60	58	2	37	29	8	24	21	3	36	32	4	42	30	12	10	5	5
chr12	369282	3.41267e-05	0.00409571	NM_001244105	TBCD	Intron	367079	370282	369214	371816			10	9	1	78	66	12	15	9	6	61	55	6	38	22	16	24	19	5	36	25	11	42	24	18	10	4	6
chr12	369394	9.44862e-17	7.95835e-14	NM_001244105	TBCD	Intron	367079	370282	369214	371816			22	0	22	81	66	15	24	10	14	77	38	39	43	17	26	53	48	5	79	0	79	56	5	51	23	0	23
chr12	369419	7.73943e-05	0.0080108	NM_001244105	TBCD	Intron	367079	370282	369214	371816			42	29	13	162	102	60	37	22	15	165	110	55	56	33	23	99	58	41	101	90	11	56	49	7	23	18	5
chr12	370886	1.05929e-30	3.44975e-27	NM_001244105	TBCD	Intron	370341	378681	369214	371816			27	0	27	116	110	6	44	15	29	107	45	62	45	20	25	81	79	2	98	0	98	94	0	94	21	0	21
chr12	371036	3.04772e-29	8.52021e-26	NM_001244105	TBCD	Intron	370341	378681	369214	371816			25	22	3	106	5	101	41	19	22	113	47	66	38	21	17	73	0	73	119	104	15	81	75	6	29	25	4
chr12	371037	8.04711e-25	1.5941e-21	NM_001244105	TBCD	Intron	370341	378681	369214	371816			19	17	2	61	2	59	36	16	20	100	40	60	32	20	12	71	0	71	92	90	2	64	62	2	23	21	2
chr12	391970	5.53098e-11	2.32067e-08	NM_001244105	TBCD	Intron	378839	413916			391763	393762	24	11	13	115	111	4	39	36	3	108	102	6	38	17	21	82	78	4	116	0	116	84	83	1	21	19	2
chr12	404280	3.23634e-06	0.000551753	NM_001244105	TBCD	Intron	378839	413916	402889	405708			47	20	27	119	11	108	87	33	54	203	85	118	92	33	59	131	27	104	228	119	109	157	71	86	46	18	28
chr12	404835	5.26998e-22	8.03442e-19	NM_001244105	TBCD	Intron	378839	413916	402889	405708			16	14	2	64	0	64	12	8	4	57	26	31	43	13	30	22	0	22	43	43	0	51	48	3	12	12	0
chr12	411321	7.93024e-08	1.96721e-05	NM_001244105	TBCD	Intron	378839	413916	410849	411419			22	22	0	125	83	42	67	65	2	121	99	22	55	40	15	126	110	16	131	127	4	99	91	8	28	28	0
chr12	411382	1.58453e-05	0.00216048	NM_001244105	TBCD	Intron	378839	413916	410849	411419			33	16	17	128	79	49	116	54	62	147	71	76	64	23	41	144	65	79	187	58	129	148	59	89	42	18	24
chr12	414046	3.07023e-05	0.00375972	NM_001244105	TBCD	Intron	414012	416687	413860	414575			22	4	18	113	23	90	56	11	45	123	21	102	59	10	49	109	11	98	80	7	73	86	5	81	21	0	21
chr12	414473	1.45393e-32	5.67008e-29	NM_001244105	TBCD	Intron	414012	416687	413860	414575			14	13	1	91	1	90	34	15	19	78	31	47	48	20	28	61	0	61	98	90	8	72	66	6	15	14	1
chr12	429165	4.56449e-05	0.005229	NM_001244105	TBCD	Intron	422054	435568			427885	429814	11	3	8	44	30	14	10	9	1	65	20	45	35	15	20	19	18	1	64	20	44	55	11	44	14	3	11
chr12	430013	1.3966e-34	6.41116e-31	NM_001244105	TBCD	Intron	422054	435568	429815	433187			20	20	0	92	1	91	19	10	9	97	42	55	50	17	33	37	0	37	89	86	3	71	68	3	20	20	0
chr12	430614	4.94779e-22	7.57104e-19	NM_001244105	TBCD	Intron	422054	435568	429815	433187			25	0	25	98	94	4	41	11	30	93	46	47	31	20	11	97	94	3	105	0	105	66	4	62	24	0	24
chr12	430615	8.05491e-14	4.93629e-11	NM_001244105	TBCD	Intron	422054	435568	429815	433187			25	0	25	72	70	2	26	10	16	74	33	41	17	6	11	70	70	0	67	0	67	45	1	44	16	0	16
chr12	433898	1.31964e-22	2.11558e-19	NM_001244105	TBCD	Intron	422054	435568			433188	434971	12	9	3	40	2	38	28	13	15	79	34	45	53	23	30	65	2	63	76	71	5	63	59	4	25	25	0
chr12	435398	2.05525e-10	7.8914e-08	NM_001244105	TBCD	Intron	422054	435568	434972	435750			17	13	4	77	1	76	19	1	18	60	10	50	46	20	26	44	0	44	74	46	28	63	27	36	13	10	3
chr12	435399	2.45685e-08	6.69535e-06	NM_001244105	TBCD	Intron	422054	435568	434972	435750			19	12	7	89	2	87	14	3	11	93	16	77	40	12	28	43	0	43	69	38	31	57	20	37	16	11	5
chr12	435557	1.57052e-05	0.00214397	NM_001244105	TBCD	Intron	422054	435568	434972	435750			32	24	8	104	62	42	42	24	18	105	43	62	36	16	20	85	69	16	129	108	21	68	40	28	34	31	3
chr12	435693	8.08253e-19	8.70565e-16	NM_001244105	TBCD	Exon	435569	435701	434972	435750			19	0	19	78	59	19	38	18	20	121	47	74	40	16	24	69	60	9	95	1	94	73	0	73	20	0	20
chr12	438239	1.28077e-19	1.53205e-16	NM_001244105	TBCD	Intron	435702	439694			438140	441400	12	12	0	63	1	62	17	8	9	62	21	41	36	14	22	32	0	32	72	55	17	59	54	5	12	10	2
chr12	438240	1.03358e-24	2.02491e-21	NM_001244105	TBCD	Intron	435702	439694			438140	441400	16	11	5	87	2	85	24	8	16	101	45	56	27	10	17	64	0	64	73	55	18	75	67	8	23	19	4
chr12	458748	1.59153e-19	1.88386e-16			Intergenic			458640	458892			11	9	2	67	1	66	12	0	12	74	28	46	39	15	24	30	0	30	44	36	8	43	36	7	11	10	1
chr12	459362	4.20743e-42	4.05754e-38			Intergenic					458893	460892	22	0	22	122	120	2	48	24	24	78	39	39	37	9	28	57	55	2	109	0	109	78	1	77	13	0	13
chr12	465144	8.77923e-06	0.00130971			Intergenic					463874	467245	10	0	10	126	37	89	19	4	15	66	11	55	32	5	27	31	26	5	94	1	93	68	2	66	15	0	15
chr12	491577	6.97819e-10	2.46905e-07			Intergenic			491423	491749			17	16	1	99	45	54	51	46	5	108	82	26	51	32	19	73	56	17	88	82	6	85	76	9	21	19	2
chr12	491578	1.73346e-09	5.7645e-07			Intergenic			491423	491749			18	7	11	99	56	43	57	15	42	101	46	55	71	30	41	90	10	80	93	28	65	95	24	71	25	0	25
chr12	509125	2.65339e-05	0.00333034			Intergenic							28	5	23	93	48	45	62	4	58	87	21	66	52	19	33	105	13	92	129	25	104	96	18	78	28	2	26
chr12	516134	8.94698e-28	2.22164e-24			Intergenic			515538	516528			15	13	2	92	3	89	29	13	16	84	45	39	39	22	17	56	0	56	63	57	6	77	74	3	12	12	0
chr12	524743	5.10044e-18	5.00013e-15	NM_001190296	WDR45B	Intron	523001	528283			523775	526912	17	13	4	97	1	96	21	14	7	71	31	40	32	11	21	29	1	28	61	54	7	67	46	21	11	9	2
chr12	539759	3.21139e-06	0.000548326	NM_001190296	WDR45B	Intron	537492	540626	539658	549252			16	2	14	151	87	64	13	2	11	151	56	95	64	31	33	29	8	21	76	23	53	65	11	54	17	6	11
chr12	540056	2.78299e-05	0.0034621	NM_001190296	WDR45B	Intron	537492	540626	539658	549252			13	10	3	52	43	9	28	12	16	59	46	13	32	17	15	49	41	8	57	27	30	56	26	30	10	3	7
chr12	547667	2.48471e-06	0.000437397			Intergenic			539658	549252			22	22	0	122	120	2	57	19	38	100	95	5	42	41	1	93	87	6	100	94	6	87	29	58	32	31	1
chr12	547778	5.27752e-05	0.00587619			Intergenic			539658	549252			15	6	9	97	42	55	54	36	18	110	68	42	48	24	24	93	61	32	104	67	37	99	67	32	25	21	4
chr12	553448	5.86729e-10	2.09686e-07			Intergenic			551424	553526			32	2	30	166	69	97	75	5	70	133	37	96	58	17	41	164	39	125	118	4	114	93	7	86	26	1	25
chr12	554555	3.81171e-07	8.19411e-05			Intergenic					553527	554730	17	9	8	74	71	3	30	28	2	76	71	5	42	17	25	64	60	4	76	0	76	57	55	2	15	15	0
chr12	554556	3.12083e-06	0.00053514			Intergenic					553527	554730	31	14	17	90	84	6	58	57	1	108	103	5	44	21	23	102	95	7	103	1	102	73	71	2	37	35	2
chr12	560325	8.60432e-24	1.55133e-20			Intergenic			559571	564852			14	0	14	73	69	4	24	8	16	70	32	38	32	13	19	42	38	4	71	0	71	51	1	50	16	0	16
chr12	563439	3.87722e-18	3.84951e-15			Intergenic			559571	564852			12	12	0	66	2	64	13	6	7	58	23	35	19	8	11	32	0	32	38	35	3	36	35	1	16	15	1
chr12	563475	1.43203e-19	1.70642e-16			Intergenic			559571	564852			12	0	12	66	62	4	13	7	6	58	32	26	19	9	10	32	29	3	38	0	38	36	1	35	16	0	16
chr12	581321	4.04563e-29	1.10858e-25			Intergenic					580567	582566	15	0	15	107	91	16	34	15	19	85	34	51	42	20	22	65	53	12	103	0	103	74	2	72	10	0	10
chr12	585234	1.36896e-11	6.282e-09			Intergenic					583606	585605	21	0	21	60	52	8	45	17	28	70	31	39	15	9	6	94	85	9	84	0	84	70	5	65	11	0	11
chr12	585235	4.21892e-26	9.15971e-23			Intergenic					583606	585605	26	0	26	103	96	7	44	19	25	94	41	53	41	22	19	128	118	10	114	0	114	85	0	85	21	0	21
chr12	624310	3.49552e-08	9.27005e-06			Intergenic					622483	624482	19	10	9	119	102	17	56	15	41	148	109	39	46	33	13	94	37	57	112	58	54	113	49	64	36	20	16
chr12	634579	2.35194e-06	0.000416738			Intergenic			632579	638089			21	9	12	98	93	5	18	17	1	134	125	9	58	27	31	65	62	3	93	0	93	80	76	4	30	29	1
chr12	642057	2.55884e-09	8.25975e-07			Intergenic			641940	642395			18	8	10	92	88	4	79	42	37	107	52	55	46	44	2	121	117	4	113	110	3	85	2	83	29	0	29
chr12	642058	1.67543e-10	6.52775e-08			Intergenic			641940	642395			16	10	6	77	76	1	49	18	31	74	29	45	43	40	3	74	69	5	84	82	2	81	1	80	19	0	19
chr12	660002	2.29373e-32	8.75305e-29			Intergenic					659787	660781	30	1	29	115	110	5	47	27	20	142	66	76	46	21	25	106	102	4	129	0	129	80	5	75	33	1	32
chr12	660003	7.55564e-34	3.24122e-30			Intergenic					659787	660781	11	0	11	92	90	2	54	24	30	103	38	65	31	12	19	73	70	3	118	0	118	68	2	66	18	0	18
chr12	661323	1.44096e-16	1.19988e-13			Intergenic			660782	661388			13	11	2	90	3	87	30	16	14	94	33	61	39	19	20	44	1	43	60	42	18	67	54	13	12	9	3
chr12	661334	5.02671e-05	0.00565718			Intergenic			660782	661388			13	11	2	90	81	9	30	28	2	94	78	16	39	34	5	44	42	2	60	35	25	67	53	14	12	6	6
chr12	661375	8.76897e-10	3.04805e-07			Intergenic			660782	661388			13	9	4	90	2	88	29	15	14	94	45	49	39	19	20	44	0	44	56	35	21	67	43	24	10	7	3
chr12	663082	2.1656e-05	0.00282134			Intergenic			662579	667984			19	11	8	63	2	61	23	0	23	74	0	74	34	20	14	58	1	57	76	69	7	52	2	50	16	0	16
chr12	663083	6.05534e-08	1.53678e-05			Intergenic			662579	667984			11	8	3	62	1	61	35	0	35	67	0	67	31	11	20	69	0	69	66	65	1	42	0	42	12	0	12
chr12	663558	7.58046e-05	0.00788167			Intergenic			662579	667984			17	17	0	79	77	2	15	15	0	79	77	2	33	29	4	41	41	0	79	72	7	75	64	11	16	13	3
chr12	666801	3.16527e-10	1.17826e-07			Intergenic			662579	667984			17	10	7	77	73	4	31	14	17	74	64	10	28	16	12	92	91	1	58	0	58	56	26	30	19	14	5
chr12	683776	7.78667e-19	8.43077e-16			Intergenic			683523	683804			20	2	18	180	103	77	29	9	20	175	86	89	69	28	41	106	26	80	111	14	97	57	4	53	17	2	15
chr12	684818	2.02771e-31	7.08583e-28			Intergenic			684037	686086			16	1	15	96	94	2	30	19	11	93	34	59	35	17	18	75	72	3	98	0	98	59	2	57	17	0	17
chr12	685030	4.18023e-20	5.25292e-17			Intergenic			684037	686086			20	20	0	68	0	68	25	15	10	74	37	37	30	14	16	84	0	84	92	90	2	65	61	4	20	19	1
chr12	685031	6.33312e-31	2.10098e-27			Intergenic			684037	686086			17	16	1	112	2	110	23	9	14	67	32	35	41	20	21	96	0	96	82	78	4	53	52	1	23	23	0
chr12	685177	2.1294e-07	4.82702e-05			Intergenic			684037	686086			16	15	1	25	2	23	21	7	14	25	18	7	14	4	10	33	1	32	51	44	7	34	32	2	14	14	0
chr12	685178	1.06758e-11	4.98357e-09			Intergenic			684037	686086			13	13	0	43	0	43	21	11	10	23	14	9	23	18	5	35	0	35	51	47	4	28	27	1	16	15	1
chr12	685245	1.54846e-06	0.00028713			Intergenic			684037	686086			39	36	3	210	106	104	53	35	18	136	97	39	61	31	30	134	87	47	109	96	13	84	61	23	27	26	1
chr12	686079	4.32466e-35	2.09341e-31			Intergenic			684037	686086			17	0	17	152	140	12	37	20	17	113	60	53	44	26	18	84	81	3	105	2	103	74	7	67	17	1	16
chr12	687336	5.40162e-05	0.00599123			Intergenic					686087	687978	18	0	18	114	45	69	39	17	22	80	11	69	40	15	25	80	23	57	64	5	59	55	6	49	10	1	9
chr12	689039	3.34563e-39	2.35147e-35			Intergenic			687979	690989			11	0	11	94	89	5	41	17	24	88	55	33	38	21	17	61	59	2	70	0	70	100	0	100	14	0	14
chr12	697608	3.86879e-06	0.00064284			Intergenic			696793	698264			10	2	8	93	7	86	42	16	26	95	38	57	28	0	28	68	26	42	73	15	58	75	41	34	16	7	9
chr12	729689	3.8863e-05	0.00457314			Intergenic					728701	730700	28	17	11	31	0	31	37	21	16	45	22	23	32	19	13	20	0	20	118	79	39	102	61	41	20	16	4
chr12	737694	1.15533e-07	2.7704e-05			Intergenic			737646	738376			11	2	9	95	57	38	33	15	18	52	33	19	23	7	16	30	22	8	81	0	81	59	16	43	15	10	5
chr12	739616	4.01852e-05	0.00470357			Intergenic			739459	739759			13	0	13	144	55	89	18	3	15	88	25	63	48	12	36	43	7	36	80	2	78	86	19	67	20	4	16
chr12	741192	1.78954e-06	0.00032695			Intergenic					740954	743207	26	17	9	109	99	10	65	59	6	99	86	13	46	18	28	91	84	7	95	0	95	94	93	1	14	14	0
chr12	741193	4.68329e-07	9.88172e-05			Intergenic					740954	743207	19	11	8	91	84	7	42	42	0	109	98	11	46	18	28	100	96	4	102	1	101	83	82	1	22	22	0
chr12	742803	5.44837e-05	0.00603455			Intergenic					740954	743207	15	9	6	56	48	8	27	7	20	68	53	15	29	13	16	58	54	4	50	0	50	52	24	28	12	11	1
chr12	781086	3.79288e-08	9.98415e-06			Intergenic							12	6	6	120	23	97	29	19	10	90	33	57	35	6	29	59	35	24	85	40	45	77	50	27	10	4	6
chr12	786708	1.27309e-11	5.87237e-09			Intergenic			786510	807454			31	9	22	126	123	3	68	66	2	194	151	43	50	34	16	139	131	8	142	58	84	96	73	23	37	13	24
chr12	786710	5.11104e-05	0.00573599			Intergenic			786510	807454			31	10	21	126	107	19	68	55	13	194	145	49	50	28	22	139	116	23	142	61	81	96	77	19	37	11	26
chr12	786712	6.80537e-10	2.40996e-07			Intergenic			786510	807454			31	11	20	127	125	2	68	67	1	194	155	39	50	38	12	139	134	5	142	64	78	96	83	13	36	12	24
chr12	786717	8.43012e-12	3.98913e-09			Intergenic			786510	807454			31	11	20	127	124	3	68	68	0	194	164	30	50	38	12	139	136	3	142	60	82	96	81	15	37	14	23
chr12	786731	2.03516e-09	6.69264e-07			Intergenic			786510	807454			31	10	21	127	121	6	68	65	3	194	152	42	50	34	16	139	129	10	142	55	87	96	77	19	37	16	21
chr12	786738	4.45974e-12	2.18947e-09			Intergenic			786510	807454			31	10	21	127	121	6	68	65	3	194	151	43	50	35	15	139	129	10	142	56	86	96	72	24	37	12	25
chr12	786744	2.63505e-12	1.34074e-09			Intergenic			786510	807454			31	9	22	127	123	4	68	66	2	194	156	38	50	35	15	139	128	11	142	56	86	95	75	20	37	12	25
chr12	786762	2.8089e-09	9.00152e-07			Intergenic			786510	807454			29	10	19	127	122	5	67	66	1	193	154	39	50	32	18	138	129	9	138	64	74	95	77	18	37	15	22
chr12	788432	1.29922e-06	0.000246423			Intergenic			786510	807454			31	30	1	94	92	2	37	34	3	141	109	32	27	27	0	94	90	4	98	92	6	103	64	39	21	16	5
chr12	788612	5.97593e-07	0.000123268			Intergenic			786510	807454			14	6	8	130	8	122	33	13	20	99	23	76	34	0	34	86	18	68	125	39	86	80	29	51	17	10	7
chr12	788631	5.35009e-17	4.66088e-14			Intergenic			786510	807454			17	16	1	80	0	80	26	0	26	79	45	34	33	17	16	61	0	61	78	73	5	54	31	23	20	19	1
chr12	788632	8.61323e-18	8.22982e-15			Intergenic			786510	807454			14	14	0	86	2	84	38	1	37	94	49	45	47	25	22	55	1	54	69	64	5	37	16	21	28	27	1
chr12	788806	2.26823e-16	1.84671e-13			Intergenic			786510	807454			15	0	15	125	113	12	27	24	3	107	51	56	49	24	25	71	65	6	62	0	62	67	27	40	12	0	12
chr12	789402	2.24951e-29	6.40385e-26			Intergenic			786510	807454			17	0	17	116	114	2	18	18	0	106	60	46	47	19	28	35	32	3	101	1	100	53	27	26	22	0	22
chr12	789403	1.30338e-18	1.37064e-15			Intergenic			786510	807454			23	0	23	109	100	9	10	8	2	115	61	54	36	13	23	36	33	3	93	0	93	58	25	33	15	0	15
chr12	789423	7.01216e-06	0.00107763			Intergenic			786510	807454			17	6	11	116	110	6	18	16	2	106	59	47	47	41	6	36	34	2	101	88	13	53	26	27	22	0	22
chr12	796587	3.01528e-08	8.08436e-06			Intergenic			786510	807454			27	13	14	129	104	25	47	39	8	108	78	30	37	17	20	111	88	23	114	0	114	77	59	18	31	23	8
chr12	796617	4.2023e-14	2.65238e-11			Intergenic			786510	807454			28	0	28	98	88	10	69	66	3	126	59	67	40	16	24	90	83	7	109	0	109	75	41	34	16	0	16
chr12	796618	1.48935e-09	4.99952e-07			Intergenic			786510	807454			14	0	14	73	66	7	21	21	0	64	30	34	39	13	26	50	47	3	48	0	48	35	19	16	14	0	14
chr12	798143	9.51124e-07	0.000186484			Intergenic			786510	807454			16	2	14	87	5	82	18	11	7	45	8	37	19	2	17	41	20	21	40	12	28	33	14	19	11	5	6
chr12	798504	2.45448e-16	1.99053e-13			Intergenic			786510	807454			15	3	12	130	86	44	14	6	8	92	28	64	60	27	33	37	3	34	100	16	84	51	9	42	14	2	12
chr12	799064	2.0166e-10	7.75258e-08			Intergenic			786510	807454			13	0	13	69	67	2	37	35	2	83	29	54	16	9	7	56	56	0	49	0	49	38	22	16	19	0	19
chr12	799089	2.76287e-05	0.00344194			Intergenic			786510	807454			15	9	6	152	103	49	29	6	23	71	48	23	45	36	9	58	20	38	80	34	46	78	29	49	16	11	5
chr12	800913	1.40288e-12	7.36391e-10			Intergenic			786510	807454			20	19	1	47	2	45	25	0	25	87	30	57	31	14	17	34	1	33	98	90	8	37	15	22	27	22	5
chr12	800927	4.13036e-06	0.000680306			Intergenic			786510	807454			20	20	0	49	43	6	25	21	4	85	43	42	26	22	4	34	34	0	97	94	3	37	37	0	27	27	0
chr12	800950	3.94789e-05	0.00463422			Intergenic			786510	807454			20	14	6	49	31	18	25	17	8	84	32	52	26	14	12	34	23	11	97	85	12	37	28	9	27	21	6
chr12	807764	1.24101e-10	4.94665e-08			Intergenic					807455	809454	14	0	14	74	61	13	23	18	5	65	27	38	36	18	18	67	54	13	62	0	62	70	30	40	24	0	24
chr12	807774	1.20999e-11	5.60209e-09			Intergenic					807455	809454	14	13	1	74	1	73	23	1	22	65	26	39	36	14	22	67	0	67	62	58	4	70	30	40	24	18	6
chr12	807777	1.37285e-07	3.23585e-05			Intergenic					807455	809454	14	7	7	74	69	5	23	18	5	65	29	36	36	34	2	67	64	3	62	55	7	70	29	41	24	0	24
chr12	817471	3.68457e-06	0.000617553			Intergenic					817170	819580	24	19	5	138	132	6	29	24	5	83	79	4	40	31	9	50	41	9	103	75	28	76	56	20	15	14	1
chr12	838799	1.17559e-05	0.00167834			Intergenic			838715	839886			46	24	22	153	96	57	22	18	4	116	87	29	52	39	13	90	68	22	136	109	27	99	88	11	33	19	14
chr12	839646	1.11985e-17	1.05541e-14			Intergenic			838715	839886			10	1	9	74	71	3	20	20	0	64	33	31	27	13	14	25	25	0	53	0	53	54	24	30	12	0	12
chr12	840641	1.96476e-17	1.8052e-14			Intergenic					839887	842345	14	0	14	114	108	6	11	11	0	61	31	30	36	8	28	37	35	2	84	0	84	71	41	30	11	0	11
chr12	845361	6.01844e-09	1.83735e-06			Intergenic			843807	854919			11	7	4	78	77	1	34	33	1	83	77	6	29	13	16	51	50	1	66	0	66	73	68	5	14	14	0
chr12	847934	3.08264e-09	9.82309e-07			Intergenic			843807	854919			14	0	14	61	34	27	20	5	15	54	13	41	23	8	15	28	5	23	66	0	66	56	8	48	11	0	11
chr12	850641	8.45898e-06	0.00126772			Intergenic			843807	854919			21	0	21	74	65	9	11	10	1	81	39	42	33	20	13	40	35	5	46	0	46	46	24	22	11	0	11
chr12	850642	6.04591e-26	1.29903e-22			Intergenic			843807	854919			21	0	21	100	88	12	35	28	7	107	51	56	38	8	30	49	41	8	119	0	119	87	27	60	25	0	25
chr12	852712	1.37958e-25	2.88447e-22			Intergenic			843807	854919			17	0	17	138	135	3	55	55	0	105	47	58	32	20	12	111	109	2	95	6	89	102	49	53	24	0	24
chr12	852744	1.58335e-10	6.20201e-08			Intergenic			843807	854919			10	0	10	78	74	4	46	24	22	52	39	13	21	17	4	88	43	45	40	3	37	77	42	35	10	0	10
chr12	852796	1.37451e-05	0.00191591			Intergenic			843807	854919			21	13	8	145	46	99	31	22	9	75	32	43	30	9	21	97	54	43	104	50	54	86	59	27	29	19	10
chr12	866076	1.46349e-05	0.00202025			Intergenic							25	6	19	118	11	107	83	15	68	90	9	81	36	2	34	110	30	80	109	13	96	106	47	59	23	2	21
chr12	876657	1.00017e-06	0.000194961			Intergenic							14	9	5	89	87	2	66	63	3	53	24	29	25	24	1	79	77	2	111	105	6	75	42	33	16	1	15
chr12	897840	1.43263e-09	4.81949e-07			Intergenic					895985	897984	18	10	8	121	116	5	45	45	0	78	69	9	41	19	22	77	75	2	79	0	79	67	64	3	20	19	1
chr12	897877	8.62565e-05	0.008722			Intergenic					895985	897984	26	9	17	122	16	106	45	2	43	106	30	76	62	23	39	77	6	71	134	55	79	96	31	65	30	9	21
chr12	897878	2.70131e-07	5.98708e-05			Intergenic					895985	897984	22	12	10	74	70	4	25	24	1	102	67	35	45	14	31	42	41	1	74	19	55	78	46	32	28	19	9
chr12	909965	6.56347e-17	5.65069e-14			Intergenic			907503	910006			15	15	0	96	0	96	27	0	27	74	37	37	40	16	24	60	0	60	60	55	5	60	35	25	11	11	0
chr12	915704	4.0277e-32	1.51379e-28			Intergenic					915484	917483	17	17	0	123	4	119	70	0	70	119	54	65	42	21	21	90	0	90	127	117	10	114	66	48	16	16	0
chr12	922225	9.70219e-06	0.00142334			Promoter	921404	923404	919603	938020			15	0	15	116	13	103	18	1	17	123	16	107	32	8	24	49	5	44	87	26	61	71	18	53	14	5	9
chr12	922279	4.17434e-08	1.09144e-05			Promoter	921404	923404	919603	938020			10	0	10	74	61	13	15	9	6	60	17	43	55	25	30	33	23	10	45	0	45	50	22	28	11	0	11
chr12	922326	1.4237e-08	4.06786e-06			Promoter	921404	923404	919603	938020			14	11	3	82	0	82	21	0	21	52	27	25	34	13	21	51	0	51	61	49	12	49	14	35	10	9	1
chr12	923108	1.02522e-07	2.48863e-05	NM_001099930	FASN	Intron	922545	923162	919603	938020			10	0	10	62	58	4	18	16	2	79	34	45	27	11	16	36	34	2	64	1	63	45	34	11	15	0	15
chr12	923109	2.86984e-12	1.45485e-09	NM_001099930	FASN	Intron	922545	923162	919603	938020			12	0	12	68	61	7	27	19	8	77	29	48	26	9	17	36	29	7	77	0	77	49	24	25	13	0	13
chr12	929636	3.7592e-06	0.000627732	NM_001099930	FASN	Intron	929548	929676	919603	938020			21	12	9	113	87	26	36	9	27	80	56	24	52	35	17	66	24	42	87	48	39	90	40	50	20	6	14
chr12	929783	3.10078e-17	2.77518e-14	NM_001099930	FASN	Exon	929677	929856	919603	938020			22	17	5	107	2	105	18	0	18	138	51	87	53	18	35	57	0	57	94	71	23	73	30	43	38	33	5
chr12	932403	2.4374e-05	0.00311189	NM_001099930	FASN	Intron	932273	932439	919603	938020			14	4	10	100	75	25	39	30	9	62	51	11	34	14	20	68	55	13	77	0	77	50	40	10	18	11	7
chr12	937743	1.40118e-05	0.0019461			Intergenic			919603	938020			20	7	13	79	61	18	17	2	15	137	67	70	52	20	32	38	12	26	128	39	89	85	39	46	32	10	22
chr12	937768	4.02243e-07	8.60103e-05			Intergenic			919603	938020			13	0	13	67	52	15	26	21	5	80	36	44	40	12	28	62	52	10	62	0	62	65	32	33	17	0	17
chr12	937817	1.30686e-06	0.000247695			Intergenic			919603	938020			13	0	13	160	84	76	40	12	28	115	44	71	55	11	44	101	46	55	62	1	61	84	25	59	17	1	16
chr12	952065	1.32743e-07	3.1413e-05			Intergenic			945459	961496			13	13	0	169	62	107	73	28	45	147	78	69	44	20	24	150	67	83	97	87	10	107	55	52	17	17	0
chr12	953160	1.41685e-05	0.00196481			Intergenic			945459	961496			10	3	7	179	101	78	64	44	20	102	37	65	48	14	34	139	76	63	68	9	59	90	41	49	13	0	13
chr12	957157	6.40386e-05	0.00689766			Intergenic			945459	961496			17	0	17	100	9	91	21	0	21	78	2	76	34	0	34	43	0	43	79	0	79	66	0	66	17	0	17
chr12	961228	8.1017e-05	0.00830083			Intergenic			945459	961496			30	7	23	108	13	95	61	24	37	148	47	101	47	17	30	105	26	79	125	51	74	128	49	79	27	11	16
chr12	964308	1.46838e-19	1.74306e-16			Intergenic			963470	964465			15	0	15	90	73	17	30	22	8	85	37	48	36	14	22	84	71	13	105	0	105	67	21	46	35	0	35
chr12	964309	2.57911e-13	1.47995e-10			Intergenic			963470	964465			19	0	19	107	94	13	30	28	2	112	47	65	35	11	24	88	78	10	91	0	91	71	36	35	19	0	19
chr12	981220	4.39025e-05	0.00506431			Intergenic					979461	983201	24	21	3	65	3	62	26	0	26	77	44	33	31	13	18	73	0	73	73	69	4	57	16	41	20	17	3
chr12	985718	2.97183e-17	2.6713e-14			Intergenic					984918	986976	24	21	3	116	5	111	48	0	48	159	74	85	44	24	20	93	4	89	113	103	10	94	43	51	20	17	3
chr12	985759	2.93444e-05	0.00362412			Intergenic					984918	986976	13	4	9	144	59	85	29	1	28	144	38	106	74	35	39	62	11	51	109	18	91	92	15	77	25	6	19
chr12	997653	9.47954e-05	0.00941779			Intergenic							20	15	5	89	65	24	28	19	9	103	84	19	46	31	15	48	30	18	71	49	22	89	45	44	22	11	11
chr12	1004516	9.667e-06	0.00141851			Intergenic							15	14	1	73	52	21	41	31	10	100	92	8	27	23	4	75	65	10	71	68	3	47	46	1	18	17	1
chr12	1004518	1.3045e-05	0.00183311			Intergenic							15	15	0	73	45	28	41	30	11	100	84	16	27	19	8	75	63	12	71	65	6	47	45	2	18	16	2
chr12	1004553	2.1683e-05	0.00282397			Intergenic							15	11	4	73	49	24	41	34	7	101	93	8	27	23	4	75	69	6	71	65	6	46	41	5	18	17	1
chr12	1008144	6.21273e-11	2.58578e-08			Intergenic			1006990	1013460			10	10	0	96	37	59	29	27	2	77	36	41	17	0	17	74	68	6	22	21	1	33	28	5	10	10	0
chr12	1041231	5.30262e-05	0.00589833			Intergenic			1040861	1041383			20	8	12	65	4	61	15	0	15	63	16	47	45	15	30	38	0	38	95	39	56	61	16	45	16	11	5
chr12	1041802	5.85998e-05	0.00641844			Intergenic			1041774	1042024			24	17	7	105	93	12	43	38	5	104	75	29	43	33	10	72	61	11	166	102	64	99	63	36	44	35	9
chr12	1041803	2.48079e-09	8.03492e-07			Intergenic			1041774	1042024			29	10	19	89	84	5	38	31	7	90	49	41	31	18	13	66	62	4	162	70	92	96	54	42	37	9	28
chr12	1058578	1.23247e-05	0.00174928			Intergenic					1056155	1060022	31	23	8	71	19	52	25	1	24	87	35	52	68	32	36	45	11	34	136	92	44	99	50	49	28	21	7
chr12	1062430	2.12971e-08	5.86941e-06			Intergenic			1062262	1063697			22	17	5	91	66	25	78	36	42	114	79	35	50	21	29	145	77	68	140	54	86	98	39	59	20	10	10
chr12	1063454	5.99139e-05	0.00653362			Intergenic			1062262	1063697			32	18	14	101	88	13	37	29	8	144	115	29	55	33	22	110	82	28	143	88	55	116	76	40	21	10	11
chr12	1081813	4.73473e-07	9.98002e-05	NM_001114272	SIRT7	Intron	1081772	1081927	1078174	1104596			15	4	11	94	92	2	53	52	1	65	47	18	29	20	9	98	96	2	33	6	27	50	37	13	10	1	9
chr12	1090806	8.22157e-12	3.89637e-09			Intergenic			1078174	1104596			22	12	10	80	9	71	21	1	20	104	31	73	54	20	34	55	3	52	125	84	41	86	40	46	17	12	5
chr12	1093902	3.9727e-05	0.00466026			Intergenic			1078174	1104596			14	11	3	90	75	15	33	26	7	114	102	12	37	36	1	55	51	4	77	73	4	77	74	3	10	10	0
chr12	1113313	8.52363e-05	0.00863498			Promoter	1112394	1114394	1112655	1114219			15	0	15	84	8	76	54	0	54	89	1	88	38	1	37	82	0	82	97	0	97	59	0	59	14	0	14
chr12	1126384	3.15196e-07	6.88045e-05			Intergenic			1120907	1129651			14	6	8	88	21	67	18	18	0	105	25	80	36	3	33	56	40	16	79	42	37	66	39	27	12	7	5
chr12	1128054	1.189e-16	9.97417e-14			Intergenic			1120907	1129651			19	0	19	103	86	17	64	57	7	138	64	74	30	12	18	112	95	17	112	0	112	68	36	32	27	0	27
chr12	1128055	7.79259e-07	0.000156234			Intergenic			1120907	1129651			20	1	19	94	68	26	39	34	5	98	53	45	25	11	14	113	98	15	77	0	77	58	27	31	12	0	12
chr12	1147105	3.70678e-06	0.000620562			Intergenic			1146975	1147176			12	0	12	128	38	90	93	26	67	133	10	123	46	5	41	126	38	88	100	0	100	86	8	78	22	0	22
chr12	1150944	8.82773e-07	0.000174429			Intergenic					1149763	1151840	10	7	3	119	10	109	24	2	22	62	21	41	39	10	29	53	4	49	77	42	35	79	25	54	10	6	4
chr12	1150965	5.12413e-08	1.32062e-05			Intergenic					1149763	1151840	10	6	4	121	6	115	25	3	22	64	19	45	40	11	29	53	3	50	77	43	34	79	23	56	10	5	5
chr12	1150980	4.70776e-06	0.000762684			Intergenic					1149763	1151840	10	7	3	122	9	113	25	3	22	64	18	46	40	13	27	53	3	50	77	39	38	79	22	57	10	6	4
chr12	1150999	1.18029e-07	2.82327e-05			Intergenic					1149763	1151840	10	7	3	122	3	119	25	2	23	64	15	49	40	11	29	53	2	51	76	38	38	79	20	59	10	5	5
chr12	1151008	3.05372e-05	0.00374327			Intergenic					1149763	1151840	10	7	3	122	12	110	25	3	22	64	15	49	40	15	25	53	3	50	76	40	36	79	23	56	10	4	6
chr12	1151058	4.11357e-05	0.00479477			Intergenic					1149763	1151840	24	7	17	199	26	173	67	13	54	150	32	118	77	13	64	141	12	129	157	52	105	162	34	128	38	23	15
chr12	1153240	8.62153e-05	0.00871926			Intergenic			1153164	1153821			10	5	5	85	52	33	26	17	9	73	32	41	32	23	9	61	48	13	60	47	13	56	41	15	10	10	0
chr12	1192052	9.91572e-05	0.00975453			Intergenic					1190503	1192502	24	6	18	62	30	32	41	9	32	90	33	57	36	13	23	60	32	28	97	53	44	68	38	30	14	9	5
chr12	1227651	1.88625e-06	0.000342686			Intergenic			1227450	1228478			17	13	4	80	67	13	23	18	5	97	84	13	63	44	19	54	36	18	70	49	21	70	45	25	29	12	17
chr12	1247051	3.52054e-08	9.32844e-06			Intergenic							14	13	1	103	31	72	66	13	53	106	49	57	57	30	27	130	25	105	87	84	3	82	39	43	16	16	0
chr12	1262209	2.01366e-06	0.00036274			Intergenic			1261134	1262860			28	10	18	66	7	59	60	13	47	129	47	82	49	15	34	104	22	82	132	68	64	95	38	57	21	12	9
chr12	1262242	6.93838e-09	2.09404e-06			Intergenic			1261134	1262860			10	0	10	70	63	7	13	13	0	77	36	41	25	11	14	50	48	2	69	0	69	65	38	27	10	0	10
chr12	1262248	2.77199e-10	1.04373e-07			Intergenic			1261134	1262860			10	0	10	70	65	5	13	13	0	77	38	39	25	11	14	50	47	3	69	0	69	66	38	28	10	0	10
chr12	1267266	5.02668e-12	2.45135e-09			Intergenic					1265080	1267821	11	0	11	46	43	3	18	16	2	50	27	23	28	7	21	41	37	4	62	0	62	44	18	26	12	0	12
chr12	1292690	4.72944e-13	2.63722e-10			Intergenic			1287861	1295777			12	8	4	104	30	74	32	29	3	98	32	66	30	5	25	75	62	13	82	54	28	75	60	15	20	15	5
chr12	1293895	2.58627e-19	2.98187e-16			Intergenic			1287861	1295777			20	19	1	105	2	103	32	0	32	116	55	61	37	16	21	58	0	58	97	89	8	62	32	30	21	18	3
chr12	1294208	5.99642e-05	0.00653795			Intergenic			1287861	1295777			10	5	5	80	70	10	24	21	3	57	21	36	36	29	7	32	30	2	44	39	5	65	28	37	11	0	11
chr12	1294298	4.44536e-05	0.00511537			Intergenic			1287861	1295777			13	6	7	97	11	86	30	16	14	96	7	89	33	1	32	73	34	39	92	34	58	73	27	46	13	3	10
chr12	1294299	1.03423e-06	0.000200723			Intergenic			1287861	1295777			14	11	3	80	78	2	36	23	13	61	52	9	36	33	3	61	32	29	73	44	29	89	64	25	16	10	6
chr12	1294353	5.66256e-06	0.000896585			Intergenic			1287861	1295777			24	18	6	75	73	2	33	21	12	94	89	5	38	33	5	83	51	32	76	50	26	74	52	22	16	13	3
chr12	1294384	7.22265e-13	3.93229e-10			Intergenic			1287861	1295777			19	18	1	77	3	74	22	0	22	92	43	49	38	13	25	49	0	49	53	52	1	52	32	20	14	13	1
chr12	1294751	1.62422e-10	6.34411e-08			Intergenic			1287861	1295777			15	15	0	116	0	116	42	0	42	125	48	77	35	18	17	90	1	89	71	61	10	102	22	80	23	22	1
chr12	1294776	1.68131e-10	6.54859e-08			Intergenic			1287861	1295777			15	14	1	116	0	116	42	0	42	125	51	74	35	18	17	90	0	90	71	62	9	103	21	82	24	23	1
chr12	1305730	2.73155e-06	0.000475002			Intergenic			1304812	1306458			19	9	10	97	94	3	35	35	0	83	29	54	40	37	3	72	69	3	78	72	6	71	28	43	15	0	15
chr12	1305731	7.46115e-07	0.000150389			Intergenic			1304812	1306458			25	10	15	150	136	14	58	55	3	138	74	64	54	50	4	106	101	5	93	92	1	76	38	38	39	1	38
chr12	1344507	2.49613e-07	5.57504e-05			Intergenic					1341855	1344563	29	0	29	99	84	15	43	39	4	94	46	48	41	19	22	115	104	11	83	0	83	98	55	43	22	0	22
chr12	1349144	3.87918e-27	9.02032e-24			Intergenic					1348475	1350474	24	24	0	95	4	91	67	0	67	98	35	63	36	22	14	94	1	93	107	103	4	79	46	33	28	28	0
chr12	1349145	8.02134e-09	2.39762e-06			Intergenic					1348475	1350474	23	21	2	100	4	96	55	0	55	100	34	66	55	28	27	93	1	92	78	71	7	66	13	53	18	16	2
chr12	1352336	5.78654e-11	2.42189e-08			Intergenic			1352079	1357955			12	3	9	71	69	2	12	11	1	44	25	19	13	5	8	23	22	1	38	4	34	24	16	8	14	1	13
chr12	1352339	3.39669e-05	0.00408037			Intergenic			1352079	1357955			25	15	10	49	9	40	11	4	7	64	37	27	16	11	5	33	8	25	127	86	41	53	39	14	34	18	16
chr12	1353175	1.80158e-07	4.15584e-05			Intergenic			1352079	1357955			29	16	13	111	22	89	23	21	2	122	40	82	56	20	36	38	18	20	128	81	47	69	38	31	39	22	17
chr12	1353985	2.15186e-06	0.00038496			Intergenic			1352079	1357955			11	2	9	98	42	56	13	2	11	98	33	65	53	20	33	63	5	58	54	10	44	66	11	55	20	2	18
chr12	1358557	1.63339e-07	3.80382e-05			Intergenic			1358384	1358709			33	15	18	110	83	27	17	3	14	132	94	38	55	27	28	32	18	14	157	60	97	65	27	38	19	9	10
chr12	1361053	5.13165e-05	0.00575342			Intergenic							13	10	3	93	93	0	11	8	3	77	73	4	47	47	0	20	11	9	64	57	7	44	30	14	10	10	0
chr12	1361058	9.43398e-11	3.83038e-08			Intergenic							13	2	11	95	5	90	12	5	7	78	8	70	48	1	47	21	9	12	70	20	50	44	26	18	11	2	9
chr12	1365406	3.48793e-13	1.97683e-10			Intergenic			1365254	1366247			30	28	2	97	9	88	49	0	49	109	59	50	35	23	12	75	7	68	91	87	4	64	33	31	20	18	2
chr12	1365407	6.94944e-28	1.72908e-24			Intergenic			1365254	1366247			19	18	1	110	1	109	69	1	68	112	41	71	44	23	21	117	1	116	111	108	3	91	42	49	30	27	3
chr12	1366301	2.25011e-07	5.07935e-05			Intergenic					1366248	1367118	18	14	4	198	92	106	24	16	8	166	97	69	64	34	30	66	50	16	116	88	28	76	54	22	25	18	7
chr12	1368985	1.13595e-17	1.06896e-14			Intergenic			1368984	1371966			17	0	17	109	107	2	25	23	2	70	26	44	31	18	13	47	47	0	94	2	92	55	32	23	12	0	12
chr12	1369012	7.58362e-06	0.00115306			Intergenic			1368984	1371966			24	7	17	119	14	105	45	17	28	75	11	64	39	7	32	79	34	45	131	41	90	86	35	51	18	6	12
chr12	1375835	2.37993e-06	0.000421217			Intergenic					1373092	1376974	29	15	14	90	12	78	39	3	36	107	49	58	38	18	20	86	5	81	180	104	76	78	26	52	36	22	14
chr12	1376652	5.23266e-14	3.27118e-11			Intergenic					1373092	1376974	11	11	0	86	0	86	30	2	28	89	52	37	29	12	17	75	5	70	68	65	3	58	24	34	19	18	1
chr12	1376653	2.51236e-11	1.10754e-08			Intergenic					1373092	1376974	19	18	1	73	0	73	32	0	32	104	57	47	41	16	25	54	0	54	70	68	2	49	21	28	15	14	1
chr12	1377335	6.29214e-16	4.86797e-13			Intergenic			1376975	1377803			15	14	1	94	0	94	20	0	20	88	37	51	29	12	17	66	0	66	73	70	3	55	23	32	13	13	0
chr12	1377336	1.19332e-05	0.00170051			Intergenic			1376975	1377803			17	16	1	22	3	19	18	0	18	65	52	13	25	23	2	20	0	20	98	95	3	36	22	14	20	17	3
chr12	1381528	4.167e-08	1.08975e-05			Intergenic					1379698	1382631	18	0	18	102	74	28	51	34	17	102	39	63	47	13	34	104	91	13	90	0	90	71	31	40	23	0	23
chr12	1386615	5.93352e-05	0.00648415			Intergenic							26	22	4	86	0	86	11	0	11	89	32	57	29	9	20	64	0	64	84	64	20	71	16	55	19	14	5
chr12	1388854	9.72506e-16	7.37258e-13			Intergenic			1388650	1389015			19	0	19	103	86	17	39	32	7	98	39	59	39	14	25	91	87	4	101	2	99	55	19	36	25	0	25
chr12	1395950	9.59338e-25	1.88243e-21			Intergenic					1395024	1398791	16	14	2	114	7	107	45	0	45	108	52	56	42	13	29	74	1	73	115	114	1	88	43	45	13	13	0
chr12	1395961	3.15524e-21	4.42532e-18			Intergenic					1395024	1398791	16	16	0	114	5	109	45	0	45	108	52	56	42	15	27	74	1	73	115	106	9	88	43	45	13	12	1
chr12	1420723	5.88277e-05	0.00644			Intergenic					1419888	1421887	12	2	10	106	55	51	46	12	34	110	35	75	41	13	28	89	32	57	49	4	45	42	12	30	11	0	11
chr12	1421123	8.76348e-15	5.94771e-12			Intergenic					1419888	1421887	17	0	17	75	69	6	50	41	9	85	52	33	36	11	25	52	43	9	73	0	73	75	37	38	15	0	15
chr12	1425871	2.32507e-08	6.3613e-06			Intergenic			1425750	1426211			16	6	10	77	64	13	57	51	6	89	74	15	53	27	26	96	82	14	102	42	60	61	38	23	23	8	15
chr12	1425882	1.22331e-08	3.54001e-06			Intergenic			1425750	1426211			16	10	6	78	70	8	31	20	11	78	62	16	41	21	20	64	54	10	79	36	43	66	31	35	13	7	6
chr12	1425883	1.15695e-07	2.77321e-05			Intergenic			1425750	1426211			16	8	8	77	69	8	57	52	5	89	69	20	53	36	17	96	77	19	102	47	55	61	45	16	23	10	13
chr12	1425900	1.49049e-06	0.000277829			Intergenic			1425750	1426211			16	12	4	78	68	10	31	22	9	78	63	15	41	28	13	64	48	16	79	51	28	66	38	28	13	4	9
chr12	1425901	1.67039e-07	3.88055e-05			Intergenic			1425750	1426211			16	10	6	77	68	9	57	54	3	89	73	16	53	36	17	96	82	14	102	53	49	61	44	17	23	12	11
chr12	1425925	2.4038e-06	0.000424778			Intergenic			1425750	1426211			16	9	7	78	68	10	31	19	12	78	61	17	41	23	18	64	43	21	79	39	40	66	39	27	13	4	9
chr12	1425926	3.50091e-06	0.000590788			Intergenic			1425750	1426211			16	9	7	78	63	15	57	47	10	89	60	29	53	24	29	96	82	14	102	39	63	61	39	22	23	9	14
chr12	1425928	7.1158e-08	1.7808e-05			Intergenic			1425750	1426211			16	9	7	78	64	14	31	18	13	78	59	19	41	22	19	64	45	19	79	43	36	66	24	42	13	4	9
chr12	1425929	7.89637e-05	0.00813669			Intergenic			1425750	1426211			16	4	12	78	63	15	57	46	11	89	63	26	53	28	25	96	82	14	102	42	60	61	35	26	23	10	13
chr12	1454802	5.66847e-07	0.000117393			Intergenic			1454800	1455077			21	12	9	141	24	117	76	41	35	107	36	71	60	20	40	138	73	65	125	65	60	138	65	73	18	11	7
chr12	1456246	8.19074e-18	7.85026e-15			Intergenic			1455985	1456350			28	24	4	98	0	98	53	1	52	101	34	67	46	26	20	77	0	77	100	81	19	68	24	44	36	34	2
chr12	1464489	1.17345e-21	1.72149e-18			Intergenic							18	16	2	66	1	65	15	0	15	65	18	47	38	19	19	22	0	22	66	65	1	29	19	10	16	16	0
chr12	1469154	1.81686e-08	5.08151e-06			Intergenic							12	0	12	69	58	11	20	17	3	92	34	58	51	15	36	79	65	14	93	0	93	46	27	19	12	0	12
chr12	1484638	1.45576e-12	7.6222e-10			Intergenic			1481132	1495350			24	23	1	85	2	83	41	0	41	79	46	33	25	14	11	106	2	104	106	103	3	63	28	35	12	12	0
chr12	1486608	3.22657e-05	0.00391342			Intergenic			1481132	1495350			11	2	9	98	10	88	33	23	10	75	13	62	38	1	37	55	36	19	70	26	44	75	29	46	19	6	13
chr12	1494837	1.61338e-30	5.0942e-27			Intergenic			1481132	1495350			20	20	0	131	1	130	20	0	20	116	49	67	44	16	28	50	0	50	122	117	5	84	45	39	22	21	1
chr12	1494867	1.59829e-34	7.31009e-31			Intergenic			1481132	1495350			20	20	0	131	1	130	20	0	20	111	50	61	44	19	25	50	1	49	122	121	1	84	49	35	22	22	0
chr12	1495229	3.61661e-05	0.00430382			Intergenic			1481132	1495350			27	21	6	56	51	5	77	72	5	89	77	12	30	28	2	122	119	3	96	91	5	60	60	0	28	28	0
chr12	1495239	1.59475e-05	0.00217156			Intergenic			1481132	1495350			27	1	26	148	96	52	94	20	74	109	25	84	43	15	28	176	67	109	96	10	86	91	35	56	28	1	27
chr12	1495240	5.0286e-08	1.29788e-05			Intergenic			1481132	1495350			12	12	0	149	61	88	83	50	33	97	54	43	47	29	18	140	67	73	81	76	5	115	80	35	22	19	3
chr12	1504573	4.29898e-13	2.40581e-10			Intergenic			1502356	1510950			11	11	0	74	0	74	20	0	20	52	29	23	27	11	16	52	3	49	47	44	3	44	22	22	13	13	0
chr12	1510530	1.73104e-19	2.04316e-16			Intergenic			1502356	1510950			12	11	1	129	7	122	38	0	38	117	62	55	41	22	19	82	0	82	86	85	1	69	31	38	14	13	1
chr12	1511195	6.18499e-08	1.56772e-05			Intergenic					1510951	1512950	19	9	10	83	78	5	23	19	4	109	103	6	30	13	17	73	64	9	102	0	102	64	64	0	25	23	2
chr12	1522013	2.54066e-10	9.63037e-08	NM_001244108	TEPSIN	Intron	1519819	1522287					11	0	11	79	77	2	21	21	0	58	29	29	29	14	15	39	38	1	41	0	41	35	23	12	10	0	10
chr12	1523629	4.11219e-06	0.000677672	NM_001244108	TEPSIN	Intron	1522860	1524223					22	18	4	77	5	72	12	2	10	110	54	56	56	16	40	31	2	29	159	99	60	83	30	53	32	24	8
chr12	1528240	4.73003e-17	4.14976e-14	NM_001244108	TEPSIN	Exon	1527995	1529542			1527227	1529226	11	0	11	86	79	7	21	20	1	66	31	35	36	9	27	45	44	1	68	0	68	46	19	27	11	0	11
chr12	1528818	4.36452e-09	1.36355e-06	NM_001244108	TEPSIN	Exon	1527995	1529542			1527227	1529226	20	18	2	164	81	83	72	49	23	104	73	31	65	44	21	122	70	52	96	88	8	116	96	20	22	19	3
chr12	1538608	1.91637e-13	1.1177e-10			Intergenic			1537813	1540225			22	0	22	92	88	4	19	15	4	114	49	65	39	23	16	58	57	1	94	0	94	95	47	48	23	0	23
chr12	1555490	5.42895e-07	0.000113016			Intergenic			1553639	1556036			19	16	3	90	1	89	34	0	34	66	24	42	26	4	22	92	0	92	79	48	31	63	17	46	20	16	4
chr12	1555491	9.01102e-10	3.12607e-07			Intergenic			1553639	1556036			34	26	8	96	3	93	55	0	55	78	31	47	32	11	21	91	0	91	97	76	21	65	20	45	29	22	7
chr12	1565149	5.62953e-06	0.000892036			Intergenic					1564128	1566546	42	22	20	82	7	75	50	2	48	123	45	78	57	16	41	60	4	56	149	73	76	99	39	60	35	18	17
chr12	1567068	2.54777e-17	2.30847e-14			Intergenic					1567038	1569637	26	25	1	83	3	80	46	0	46	101	51	50	43	22	21	98	1	97	128	127	1	87	36	51	30	30	0
chr12	1567069	4.05671e-14	2.57486e-11			Intergenic					1567038	1569637	21	20	1	83	1	82	47	0	47	99	53	46	34	16	18	87	0	87	94	91	3	90	36	54	23	23	0
chr12	1567565	1.38375e-05	0.00192599			Intergenic					1567038	1569637	19	2	17	124	100	24	74	49	25	113	48	65	49	20	29	107	75	32	86	16	70	94	55	39	12	1	11
chr12	1569964	1.31239e-05	0.00184254			Intergenic			1569638	1570081			15	2	13	37	2	35	11	0	11	53	3	50	36	0	36	38	1	37	75	21	54	69	15	54	14	4	10
chr12	1570030	9.37357e-07	0.000183987			Intergenic			1569638	1570081			25	16	9	89	76	13	39	38	1	131	98	33	44	34	10	60	58	2	155	85	70	85	60	25	33	16	17
chr12	1572623	1.31967e-05	0.00185088			Intergenic			1572454	1573698			12	5	7	65	3	62	18	0	18	54	0	54	35	0	35	51	0	51	69	0	69	37	1	36	12	0	12
chr12	1597261	2.7851e-16	2.24258e-13			Intergenic			1596980	1597266			17	16	1	106	2	104	27	1	26	76	37	39	44	0	44	53	1	52	81	79	2	87	35	52	13	13	0
chr12	1597262	3.47733e-16	2.76772e-13			Intergenic			1596980	1597266			11	11	0	92	2	90	31	0	31	83	35	48	37	0	37	58	0	58	73	68	5	57	23	34	14	12	2
chr12	1600355	7.15146e-15	4.89908e-12			Intergenic							10	0	10	69	63	6	14	12	2	63	31	32	46	46	0	44	44	0	73	0	73	38	16	22	10	0	10
chr12	1600356	1.93256e-08	5.3713e-06			Intergenic							12	0	12	62	54	8	34	29	5	50	22	28	34	28	6	51	47	4	42	0	42	41	19	22	13	0	13
chr12	1604746	5.91891e-18	5.75714e-15			Intergenic			1604517	1607549			24	1	23	107	101	6	56	54	2	107	45	62	30	30	0	90	90	0	107	1	106	63	35	28	23	0	23
chr12	1604747	2.13506e-23	3.73574e-20			Intergenic			1604517	1607549			13	0	13	117	113	4	34	32	2	86	41	45	21	21	0	106	99	7	90	0	90	62	33	29	24	0	24
chr12	1606516	7.40746e-10	2.6135e-07			Intergenic			1604517	1607549			34	13	21	159	95	64	57	28	29	139	67	72	71	32	39	92	23	69	175	50	125	123	43	80	24	5	19
chr12	1611045	1.47346e-05	0.00203243			Intergenic							37	23	14	106	80	26	29	22	7	165	97	68	56	36	20	97	79	18	195	82	113	99	60	39	42	18	24
chr12	1611390	8.43932e-17	7.1567e-14			Intergenic							16	15	1	94	3	91	32	0	32	102	51	51	48	0	48	41	0	41	80	72	8	84	40	44	16	16	0
chr12	1611634	5.11391e-05	0.00573818			Intergenic							12	7	5	71	67	4	27	25	2	71	55	16	29	27	2	43	42	1	56	1	55	59	56	3	13	11	2
chr12	1611695	1.15737e-12	6.13212e-10			Intergenic							12	11	1	71	3	68	27	0	27	70	43	27	29	0	29	43	1	42	58	54	4	59	30	29	13	13	0
chr12	1611710	7.2532e-05	0.00761716			Intergenic							20	17	3	184	102	82	74	49	25	103	64	39	65	31	34	128	84	44	83	72	11	77	53	24	22	22	0
chr12	1613255	4.94491e-10	1.7862e-07			Intergenic							14	12	2	36	2	34	25	10	15	37	12	25	23	5	18	30	16	14	72	58	14	51	33	18	17	14	3
chr12	1614785	8.31751e-09	2.47722e-06			Intergenic							15	9	6	91	85	6	40	34	6	85	58	27	36	32	4	40	38	2	174	87	87	100	66	34	23	15	8
chr12	1614890	4.40047e-09	1.37409e-06			Intergenic							12	7	5	59	7	52	19	3	16	77	38	39	33	1	32	19	0	19	132	94	38	61	26	35	15	10	5
chr12	1629061	1.57201e-13	9.25533e-11			Intergenic							12	12	0	74	2	72	18	0	18	62	32	30	25	0	25	33	0	33	61	59	2	46	22	24	12	11	1
chr12	1629069	7.28707e-05	0.0076437			Intergenic							12	0	12	114	45	69	23	5	18	82	22	60	41	16	25	44	13	31	61	2	59	58	10	48	12	1	11
chr12	1630117	1.37842e-15	1.03302e-12			Intergenic							17	14	3	76	1	75	28	0	28	71	30	41	35	1	34	62	0	62	97	81	16	57	26	31	17	14	3
chr12	1637427	1.59548e-05	0.00217208			Intergenic							17	9	8	106	27	79	33	25	8	98	30	68	40	16	24	95	60	35	124	63	61	100	54	46	22	14	8
chr12	1638504	5.24283e-09	1.61683e-06			Intergenic							18	11	7	88	17	71	27	15	12	87	46	41	45	17	28	70	42	28	94	64	30	77	46	31	21	16	5
chr12	1644382	9.72571e-06	0.00142646			Intergenic					1643712	1644457	26	15	11	83	6	77	33	10	23	93	31	62	53	4	49	55	11	44	98	53	45	102	39	63	15	10	5
chr12	1644383	7.636e-06	0.00115936			Intergenic					1643712	1644457	11	5	6	73	62	11	32	28	4	73	49	24	40	34	6	44	35	9	102	57	45	50	29	21	15	5	10
chr12	1651020	2.91812e-19	3.34896e-16			Intergenic			1650997	1656386			15	14	1	85	4	81	42	0	42	81	45	36	25	0	25	87	1	86	71	70	1	54	38	16	13	12	1
chr12	1653510	3.89762e-13	2.19801e-10			Intergenic			1650997	1656386			25	25	0	97	0	97	27	0	27	108	53	55	47	0	47	56	0	56	100	90	10	66	29	37	14	13	1
chr12	1694657	8.48755e-05	0.00860774			Intergenic			1691887	1698838			13	5	8	52	37	15	18	5	13	53	26	27	42	29	13	46	3	43	65	21	44	66	28	38	15	3	12
chr12	1720758	3.31324e-32	1.25283e-28			Intergenic			1708838	1725965			27	26	1	115	2	113	83	52	31	108	63	45	27	0	27	115	52	63	122	118	4	71	63	8	30	30	0
chr12	1720759	1.75046e-33	7.38186e-30			Intergenic			1708838	1725965			22	22	0	74	1	73	70	38	32	85	34	51	27	1	26	96	47	49	118	113	5	84	80	4	23	22	1
chr12	1724073	8.20891e-06	0.00123479			Intergenic			1708838	1725965			11	3	8	115	8	107	45	27	18	61	3	58	43	1	42	87	49	38	90	23	67	55	24	31	11	2	9
chr12	1724493	2.49483e-25	5.16419e-22			Intergenic			1708838	1725965			20	0	20	113	108	5	14	14	0	118	58	60	48	48	0	36	36	0	104	2	102	56	26	30	29	0	29
chr12	1724494	3.24637e-11	1.40328e-08			Intergenic			1708838	1725965			23	0	23	92	88	4	11	10	1	95	30	65	44	43	1	44	43	1	52	0	52	34	17	17	30	0	30
chr12	1725240	7.51795e-13	4.08021e-10			Intergenic			1708838	1725965			29	27	2	78	76	2	10	5	5	76	72	4	46	44	2	42	18	24	70	65	5	67	30	37	20	14	6
chr12	1725849	1.58803e-19	1.8815e-16			Intergenic			1708838	1725965			16	12	4	62	4	58	33	14	19	56	34	22	15	0	15	75	31	44	64	59	5	45	41	4	17	16	1
chr12	1725850	3.621e-36	1.95856e-32			Intergenic			1708838	1725965			19	17	2	63	2	61	29	9	20	78	37	41	27	0	27	81	44	37	101	98	3	69	67	2	20	20	0
chr12	1733663	9.48631e-05	0.00942376			Intergenic			1733187	1756485			10	8	2	71	36	35	36	34	2	38	29	9	14	4	10	46	39	7	85	72	13	39	33	6	20	17	3
chr12	1734068	2.23964e-06	0.000398769			Intergenic			1733187	1756485			14	5	9	91	84	7	19	19	0	61	41	20	35	35	0	40	39	1	52	50	2	60	28	32	14	0	14
chr12	1735864	7.81504e-12	3.71078e-09			Intergenic			1733187	1756485			15	13	2	54	14	40	60	58	2	42	29	13	25	16	9	84	74	10	97	84	13	56	54	2	16	16	0
chr12	1739450	4.17234e-15	2.96773e-12			Intergenic			1733187	1756485			25	6	19	43	42	1	18	3	15	75	36	39	12	12	0	57	11	46	136	19	117	86	21	65	38	5	33
chr12	1739451	1.21002e-13	7.24754e-11			Intergenic			1733187	1756485			13	10	3	29	3	26	15	13	2	50	23	27	14	1	13	33	23	10	97	82	15	79	73	6	15	11	4
chr12	1740312	2.43826e-19	2.8184e-16			Intergenic			1733187	1756485			16	0	16	128	124	4	43	42	1	90	42	48	41	41	0	95	92	3	94	1	93	56	33	23	11	0	11
chr12	1741860	4.13878e-09	1.29628e-06			Intergenic			1733187	1756485			18	18	0	227	119	108	31	23	8	134	78	56	61	34	27	99	70	29	57	56	1	81	62	19	20	20	0
chr12	1741879	2.44121e-12	1.24773e-09			Intergenic			1733187	1756485			18	18	0	110	107	3	25	15	10	85	82	3	33	32	1	72	39	33	57	57	0	60	22	38	20	19	1
chr12	1743815	8.85069e-11	3.60886e-08			Intergenic			1733187	1756485			17	15	2	86	83	3	12	10	2	54	30	24	21	19	2	50	46	4	38	36	2	51	25	26	17	0	17
chr12	1750328	2.53137e-33	1.05322e-29			Intergenic			1733187	1756485			29	28	1	98	1	97	53	23	30	100	51	49	48	0	48	90	35	55	128	120	8	61	57	4	26	26	0
chr12	1752698	9.30603e-05	0.00927652			Intergenic			1733187	1756485			30	15	15	148	144	4	61	41	20	124	97	27	41	40	1	116	77	39	123	93	30	130	96	34	29	14	15
chr12	1755709	5.3136e-06	0.000847698			Intergenic			1733187	1756485			21	5	16	12	12	0	11	2	9	42	10	32	15	15	0	27	2	25	85	11	74	50	3	47	17	4	13
chr12	1755806	9.15215e-05	0.00914726			Intergenic			1733187	1756485			25	23	2	122	113	9	63	33	30	135	126	9	45	43	2	104	54	50	143	134	9	92	44	48	35	33	2
chr12	1755831	2.04122e-07	4.64543e-05			Intergenic			1733187	1756485			25	24	1	122	121	1	63	36	27	138	128	10	45	43	2	104	62	42	143	133	10	92	44	48	35	34	1
chr12	1755832	6.10294e-07	0.000125555			Intergenic			1733187	1756485			16	16	0	72	71	1	44	16	28	76	72	4	29	29	0	51	25	26	65	65	0	66	19	47	18	18	0
[truncated: 10,739 more rows]

## Sheet: 415 genes associated with DMCs
Chromosome		NCBI Reference Sequence	Gene name	Gene start position	Gene end position	Number of DMCs inside the gene
chr1		NM_001244864	MPC1	2541536	2552860	3
chr1		NM_001244534	SFT2D1	2576814	2593516	2
chr1		NM_001044603	PRKN	5698507	6731132	9
chr1		NM_001143697	AGPAT4	6807761	6883255	2
chr1		NM_001244473	IGF2R	7369484	7472480	13
chr1		NM_001243543	TAGAP	8209297	8217993	2
chr1		NM_001128475	TFB1M	11566304	11648366	1
chr1		NM_214133	VNN1	31003337	31023731	1
chr1		NM_001167653	PDSS2	73253304	73510244	1
chr1		NM_001135959	FOXO3	74629694	74738437	4
chr1		NM_001080206	FYN	77585913	77642342	1
chr1		NM_001143716	MAP2K1	164381891	164469312	1
chr1		NM_001244461	GMFB	183849369	183863334	1
chr1		NM_001206404	TJP2	222474649	222612989	1
chr1		NM_001243624	TRMO	239768663	239786932	1
chr1		NM_001077215	PTBP3	252991647	253056361	1
chr1		NM_001258424	LMX1B	267207686	267286728	1
chr1		NM_001243487	URM1	268798438	268815534	1
chr1		NM_001244486	ZER1	269088697	269121879	1
chr1		NM_001243457	NTMT1	269819773	269828832	1
chr1		NM_001244285	FUBP3	270652698	270702920	1
chr1		NM_001001644	MED27	271724909	271928367	6
chr1		NM_001253922	SARDH	273231348	273294621	2
chr1		NM_001014971	COL5A1	273934218	274083264	11
chr1		NM_213868	FCN2	274106275	274111970	1
chr10		NM_001123210	UCHL5	725687	761633	1
chr10		NM_001160092	SMYD3	18267597	19019520	1
chr10		NM_001348771	TLR5	19387665	19410024	3
chr10		NM_001100188	CAPN2	19758823	19820241	3
chr10		NM_001267893	NR5A2	22728018	22865352	5
chr10		NM_213912	TNNI1	23788278	23800108	2
chr10		NM_213979	FBP1	27588608	27622225	1
chr10		NM_001201485	BAMBI	40053367	40058590	2
chr10		NM_001195781	PIP4K2A	52224532	52408928	2
chr10		NM_001285971	BMI1	52586088	52596154	1
chr10		NM_213968	ITGB1	56078398	56130608	1
chr10		NM_001243935	CAMK1D	59205274	59454435	6
chr10		NM_001243823	CDC123	59718339	59765621	1
chr10		NM_001134353	KLF6	66488444	66497829	2
chr10		NM_001244454	WDR37	68489776	68528598	5
chr11		NM_213881	CRYL1	845470	925169	10
chr11		NM_001177919	LATS2	1225525	1254381	1
chr11		NM_213801	FGF9	1554647	1581938	3
chr11		NM_001012613	SLC7A1	6538051	6604641	8
chr11		NM_001243910	SLC25A15	15494175	15547626	1
chr11		NM_001285967	RB1	19188482	19317642	3
chr11		NM_001252205	TMTC4	69362094	69442448	3
chr11		NM_001243422	NAXD	77210231	77230687	1
chr12		NM_001244105	TBCD	327008	449375	48
chr12		NM_001190296	WDR45B	522834	546826	3
chr12		NM_001099930	FASN	922404	937560	5
chr12		NM_001114272	SIRT7	1078205	1083881	1
chr12		NM_001244108	TEPSIN	1519759	1529542	4
chr12		NM_001145985	TIMP2	3254793	3298308	1
chr12		NM_001048069	JPT1	6139512	6157658	1
chr12		NM_001244792	FADS6	6353715	6366660	1
chr12		NM_001244727	FDXR	6372294	6382769	1
chr12		NM_001143724	SLC9A3R1	6466137	6483538	2
chr12		NM_001244303	CD300C	6632077	6635924	1
chr12		NM_001044605	CACNG1	13463225	13474324	1
chr12		NM_001143722	PITPNC1	13741402	14015571	1
chr12		NM_001097520	NAGS	19170397	19173968	1
chr12		NM_214156	HCRT	20588596	20589991	1
chr12		NM_001105302	ACLY	20796714	20841293	1
chr12		NM_001243807	FKBP10	20872155	20881604	1
chr12		NM_214323	JUP	20902394	20931208	1
chr12		NM_001244895	KRT31	21209792	21213828	1
chr12		NM_001315780	MSI2	33537274	33967835	2
chr12		NM_001244532	DHRS11	38114016	38123360	1
chr12		NM_001114269	ACACA	38583285	38800425	1
chr12		NM_001243183	AP2B1	39803110	39926878	1
chr12		NM_001244103	LIG3	40153390	40183586	1
chr12		NM_001253818	ABR	46812498	46895819	1
chr12		NM_001177921	SPATA22	49577835	49605867	1
chr12		NM_001243862	NDEL1	53601832	53640461	1
chr12		NM_001244077	CCDC42	53869558	53883929	1
chr12		NM_213851	PIK3R5	53979205	54046927	2
chr12		NM_001044548	NTN1	54089476	54292191	13
chr12		NM_001246266	GLP2R	54680280	54735099	3
chr12		NM_213745	MYOCD	56931627	57029258	8
chr12		NM_001243216	ELAC2	57206595	57238438	9
chr12		NM_001244626	COX10	58011830	58110575	6
chr12		NM_214138	AKAP10	59732316	59782422	4
chr12		NM_001012297	SLC5A10	60281882	60332141	12
chr12		NM_214157	SREBF1	60733972	60750520	1
chr12		NM_214365	PEMT	60892687	60919121	7
chr12		NM_001244149	COPS3	61001253	61023920	2
chr13		NM_214201	GPX1	31916268	31917337	3
chr13		NM_001123195	SLCO2A1	75108539	75189660	1
chr13		NM_001123197	SOX2	119668475	119669435	2
chr13		NM_214372	APP	189435283	189715952	2
chr13		NM_001244456	ERG	202000990	202129336	1
chr13		NM_001143700	AGPAT3	206884549	206904470	6
chr13		NM_213908	ITGB2	207514280	207544108	4
chr14		NM_001195329	CDK20	16619	23773	1
chr14		NM_001083930	HR	6386899	6404964	1
chr14		NM_001123072	ADRA1A	10637143	10730857	1
chr14		NM_001044576	NCOR2	28624701	28819404	3
chr14		NM_001173519	ORAI1	31012211	31028008	1
chr14		NM_001044611	ALDH2	39902316	39933113	1
chr14		NM_001206399	ACACB	41621573	41739916	2
chr14		NM_001098589	HPS4	44050115	44071677	1
chr14		NM_001243490	TPST2	44122155	44140654	1
chr14		NM_001243319	LOC100152327	48800247	49004642	1
chr14		NM_001243455	GNB1L	51306567	51343029	1
chr14		NM_001206919	DGCR8	51473511	51489535	1
chr14		NM_001142827	LGALS8	54871683	54889071	1
chr14		NM_001243605	MICU1	75203733	75445598	1
chr14		NM_001243122	NCOA4	90505613	90531171	1
chr14		NM_001044574	PRKG1	97562709	98793080	3
chr14		NM_214210	OPALIN	107793681	107809764	2
chr14		NM_001315654	SLC18A2	127357604	127394242	1
chr14		NR_035399	MIR202	141207133	141207213	1
chr14		NM_001190175	ECHS1	141340319	141348870	1
chr15		NM_213750	CACNB4	186894	455691	1
chr15		NM_001204765	ACVR2A	4177332	4259056	1
chr15		NM_001315712	GLI2	30312533	30579265	10
chr15		NM_001244861	GTF2E2	54444479	54525566	1
chr15		NM_001244263	LNPK	81730445	81805662	2
chr15		NM_001243330	FRZB	88332855	88376347	1
chr15		NM_001243304	CYP27A1	120809885	120852196	1
chr15		NM_001315714	NMUR1	132218772	132228645	1
chr15		NM_001195333	DIS3L2	132540845	132902939	3
chr15		NM_001098594	MLPH	137180991	137219556	5
chr15		NM_001243950	RAB17	137236058	137255813	1
chr15		NM_214199	RAMP1	137490439	137535556	1
chr15		NM_001044529	CAPN10	139557771	139568759	1
chr15		NM_001243902	PPP1R7	139918008	139936493	1
chr15		NM_001190283	ATG4B	140223962	140245325	1
chr15		NM_001204379	PDCD1	140337352	140347475	2
chr16		NM_213938	OXCT1	26514490	26659734	1
chr16		NM_001244746	TRAPPC13	44146633	44183504	1
chr16		NM_001137624	SLC30A5	47284973	47320892	1
chr16		NM_001031794	SPARC	71368163	71380972	1
chr16		NM_001145987	TNIP1	71947668	71979232	8
chr16		NM_001278779	CCT5	72211468	72223190	1
chr16		NM_001244300	TERT	79258590	79276421	6
chr16		NM_001195371	TRIP13	79458846	79473705	1
chr16		NM_001123206	TPPP	79535103	79553224	1
chr17		NM_001099935	IKBKB	11290333	11347417	1
chr17		NM_001004044	PCSK2	25681423	25920690	1
chr17		NM_001190212	DDRGK1	32479980	32491401	2
chr17		NM_001185136	PIGU	37960023	38081062	1
chr17		NM_001159307	BPI	41359175	41389241	2
chr17		NM_214218	KCNB1	51040870	51142636	1
chr17		NM_001205093	TMEM189	51674098	51697981	1
chr17		NM_001123082	BCAS4	52239398	52304259	1
chr17		NM_001113452	NFATC2	52743569	52890236	5
chr17		NM_001114672	ATP9A	52936168	53072379	7
chr17		NM_001114673	SALL4	53084311	53103023	3
chr17		NM_001123217	ZNF217	54605938	54631755	3
chr17		NM_001105290	BMP7	57586821	57675961	1
chr17		NM_001105296	RAE1	57752180	57767952	2
chr17		NM_001105312	RBM38	57783155	57797992	3
chr17		NM_001123158	PCK1	57930554	57936523	1
chr17		NM_001128449	ANKRD60	58425164	58434669	1
chr17		NM_001123213	VAPB	58594748	58644925	2
chr17		NM_001123199	STX16	58840340	58864481	4
chr17		NM_001123148	NPEPL1	58875683	58891247	2
chr17		NM_001113698	NELFCD	59129075	59141499	3
chr17		NM_001123087	ZNF831	59311924	59379651	2
chr17		NM_001098582	EDN3	59425841	59447058	2
chr17		NM_001110176	PHACTR3	59747987	59862928	5
chr17		NM_001243652	PSMA7	61566372	61571516	1
chr18		NM_214295	NOS3	6209217	6228912	1
chr18		NM_214454	AQP1	42065383	42076551	2
chr18		NM_001144118	CRHR2	42266425	42294563	1
chr18		NM_001315730	JAZF1	44488529	44825178	9
chr18		NM_001244338	HOXA10	45393944	45402043	3
chr18		NM_001195105	IGFBP1	50018486	50022799	1
chr2		NM_001244431	TMEM80	428296	433533	1
chr2		NM_001243810	CHID1	552318	570793	5
chr2		NM_001037721	CTSD	1188554	1197642	1
chr2		NM_213883	IGF2	1472037	1496154	1
chr2		NM_001078679	CD81	1625975	1641135	2
chr2		NM_001285976	NAP1L4	2070139	2098429	2
chr2		NM_001031797	FADD	3191717	3194820	1
chr2		NM_001129805	CPT1A	4250641	4293914	3
chr2		NM_001244878	GRK2	5209435	5227415	2
chr2		NM_214349	PC	5566607	5587797	1
chr2		NM_001243915	KAT5	6564331	6572218	2
chr2		NM_001348784	CAPN1	6997512	7023342	2
chr2		NM_001190278	ATG2A	7262030	7282347	1
chr2		NM_001204770	MACROD1	7939124	8087656	3
chr2		NM_214034	CHRM1	8858764	8872042	1
chr2		NM_001171750	FADS2	9633940	9666666	1
chr2		NM_001244835	C2H11orf49	15401150	15606590	2
chr2		NM_001243711	ELF5	26457053	26485297	1
chr2		NM_214259	BDNF	32644660	32679022	1
chr2		NM_001142669	TEAD1	46403448	46670268	1
chr2		NM_001256770	NLRP3	56892242	56977228	1
chr2		NM_001131046	IFI30	59629761	59633714	1
chr2		NM_001243031	CC2D1A	65235756	65252477	4
chr2		NM_001244371	PIN1	68715897	68729471	5
chr2		NM_001243854	S1PR2	69050418	69057270	1
chr2		NM_001114670	TYK2	69157786	69183406	1
chr2		NM_001114671	KEAP1	69280940	69289509	1
chr2		NM_001123135	PLIN5	74305735	74313831	1
chr2		NM_001168422	B4GALT7	80349731	80359879	1
chr2		NM_214242	F12	80535946	80544826	1
chr2		NM_001098585	AP3B1	86876421	87142663	1
chr2		NM_001243213	LHFPL2	87323194	87498377	1
chr2		NM_213960	VDAC1	136302942	136320608	1
chr2		NM_001243924	SEC24A	136884045	136949715	1
chr2		NM_001244562	H2AFY	137535127	137616359	2
chr2		NM_001203267	ANKHD1	142166313	142298097	1
chr2		NM_001008481	NR3C1	144826400	144929697	1
chr2		NM_214025	PPP2R2B	147938077	148233805	1
chr2		NM_001001267	HTR4	149768294	149884727	1
chr2		NM_001128436	ADRB2	150033795	150035052	1
chr2		NM_001244817	AFAP1L1	150445145	150507577	11
chr2		NM_001244954	LOC100514340	150561381	150578187	1
chr3		NM_214226	ADAP1	548822	615471	12
chr3		NM_001145219	GRIFIN	1776156	1777520	1
chr3		NM_001195325	AMZ1	1964094	1993168	2
chr3		NM_001244772	AP5Z1	3622683	3639207	4
chr3		NM_001190295	WIPI2	3800207	3830962	2
chr3		NM_001243585	RAC1	4783052	4803510	1
chr3		NM_001134356	ARPC1B	6336498	6342353	1
chr3		NM_001244699	PVRIG	8230501	8232769	1
chr3		NM_001244153	MDH2	10120120	10132705	1
chr3		NM_001129959	POR	10212735	10270858	3
chr3		NM_001246269	AUTS2	13565438	14794360	13
chr3		NM_001293144	PHKG1	16822041	16831054	1
chr3		NM_001284366	KAT8	17362325	17373110	1
chr3		NM_001166317	PHKG2	17640796	17656641	3
chr3		NM_001244989	SEPT1	17924650	17937948	1
chr3		NM_001243020	SPNS1	18629645	18638442	2
chr3		NM_001243581	CPPED1	30362724	30484250	2
chr3		NM_001135680	USP7	33754356	33810125	1
chr3		NM_001244099	CDIP1	37815725	37839266	1
chr3		NM_001243945	TRAP1	38536709	38595273	2
chr3		NM_001245000	CLUAP1	38717451	38753385	2
chr3		NM_001246202	PKD1	39849608	39899455	3
chr3		NM_001137639	SLC9A3R2	39942370	39952824	1
chr3		NM_001048186	IGFALS	40174798	40177789	2
chr3		NM_001244801	NUBP2	40178416	40184585	1
chr3		NM_001204369	UBE2I	40556555	40568941	4
chr3		NM_001100189	SLC9A2	51535797	51623003	1
chr3		NM_214251	TGFA	71948417	72049253	1
chr3		NM_001195357	MSH2	93082957	93163556	2
chr3		NM_001097420	EPAS1	94167758	94253662	2
chr3		NM_213962	HADHA	112753342	112797627	1
chr3		NM_001097437	DNMT3A	113585955	113603090	2
chr3		NM_001195119	PDIA6	125756756	125774225	1
chr3		NM_001099926	ADAM17	126795629	126852843	2
chr3		NM_001243698	ADI1	131295256	131303663	1
chr3		NM_001244207	EIPR1	131360940	131435574	3
chr3		NM_001184752	TPO	132384819	132408943	1
chr4		NM_214051	DGAT1	452902	462478	1
chr4		NM_001243819	HSF1	463530	486465	1
chr4		NM_001194975	AGO2	2920207	3012388	5
chr4		NM_001168418	TG	8158394	8382435	8
chr4		NM_001243334	LRRC6	8532725	8605632	1
chr4		NM_001293141	RSPO2	29415773	29577890	1
chr4		NM_001243691	CPQ	39492662	39967556	1
chr4		NM_001190196	ARMC1	68983042	69015746	1
chr4		NM_214155	CD247	83494375	83584415	1
chr4		NM_001244259	POGK	84190514	84203175	1
chr4		NM_001171541	ATP1A2	90343538	90370905	1
chr4		NM_001005730	GBA	94600070	94606092	2
chr4		NM_213985	KCNN3	94929807	95107848	1
chr4		NM_001246198	TDRD10	95231252	95284485	1
chr4		NM_001243322	INTS3	95905499	95944805	1
chr4		NM_001244361	PGLYRP3	96261763	96277521	1
chr4		NM_214249	ATP1A1	104353508	104384321	1
chr4		NM_001038645	PALMD	118377245	118427800	1
chr4		NM_214272	TGFBR3	125137570	125307549	8
chr4		NM_001112686	LMO4	128894297	128907989	1
chr4		NM_001085443	SELENOF	129258942	129287726	6
chr4		NM_214148	CLCA1	129621258	129655385	6
chr5		NM_001007191	CPT1B	156176	163388	2
chr5		NM_001206376	SCO2	220800	222678	1
chr5		NM_001206363	NCAPH2	222783	233491	1
chr5		NM_001206370	SBF1	266514	284238	8
chr5		NM_001206372	PPP6R2	285380	341527	2
chr5		NM_001204383	ARHGAP8	4399875	4450496	2
chr5		NM_001204382	PRR5	4467230	4494164	2
chr5		NM_001244621	PARVG	4874342	4898466	4
chr5		NM_001146126	PNPLA3	5075621	5092515	1
chr5		NM_213954	ACO2	7014382	7071023	2
chr5		NM_001244667	DNAL4	9236652	9248735	2
chr5		NM_001099933	SOX10	9891688	9900754	2
chr5		NM_001244837	RBFOX2	11809149	11899874	1
chr5		NM_001001642	PRKAG1	15033628	15049619	2
chr5		NM_001114676	LIMA1	16074442	16177042	1
chr5		NM_001195322	ACVR1B	17314321	17347751	1
chr5		NM_001170520	CCT2	33858536	33873596	1
chr5		NM_001105306	LAG3	63929668	63935054	1
chr5		NM_214006	CD9	64420176	64459776	1
chr5		NM_001246221	VWF	64517592	64655938	3
chr5		NM_214088	CCND2	66092482	66114575	1
chr5		NM_001077226	TSPAN9	66916980	66994751	4
chr5		NM_001142666	TEAD4	67130391	67167579	1
chr5		NM_214016	ADA2	69526413	69550360	1
chr6		NM_001177918	SPATA2L	328533	331334	1
chr6		NM_001243360	CHMP1A	351877	358655	2
chr6		NM_214108	DPEP1	361192	366235	2
chr6		NM_213955	GALNS	869283	890137	9
chr6		NM_214267	CYBA	1015211	1021419	2
chr6		NM_001244650	BANP	1421459	1495484	6
chr6		NM_001243840	KLHDC4	1627054	1672328	1
chr6		NM_001252427	IRF8	3041616	3060668	2
chr6		NM_001109945	CDH13	4816572	5832188	2
chr6		NM_001167649	HSD17B2	6296428	6360434	1
chr6		NM_001285975	IL34	13648237	13659394	2
chr6		NM_001163060	CDH1	18075486	18155986	1
chr6		NM_001278781	NLRC5	18971176	19036288	1
chr6		NM_001256776	CCL22	19296725	19301505	1
chr6		NM_001112692	FTO	31177111	31564674	2
chr6		NM_001243463	AKTIP	31747679	31757863	1
chr6		NM_214330	GPI	44038373	44069331	1
chr6		NM_214117	HAMP	44785862	44787303	1
chr6		NM_001315601	FFAR3	44844148	44845172	1
chr6		NM_001001534	RYR1	47339758	47458457	2
chr6		NM_001256779	AKT2	48561369	48587924	3
chr6		NM_214015	TGFB1	49332170	49348601	1
chr6		NM_001123083	BCKDHA	49382209	49398398	1
chr6		NM_001315716	BCL3	51256032	51264923	1
chr6		NM_214308	APOE	51372289	51375333	3
chr6		NM_001123118	GPR4	51969616	51970708	1
chr6		NM_001244452	AP2S1	52695639	52703198	1
chr6		NM_001244384	NAPA	53249331	53275238	1
chr6		NM_001195508	GYS1	54234599	54250211	2
chr6		NM_001243867	RUVBL2	54250503	54263492	3
chr6		NM_214080	LHB	54263642	54264347	1
chr6		NM_001315804	U2AF2	59774189	59788774	1
chr6		NM_001204374	PRKCZ	64073342	64159187	12
chr6		NM_001244721	WRAP73	65155205	65167061	3
chr6		NM_001244820	C6H1orf174	65326980	65333891	1
chr6		NM_001078663	PARK7	68630331	68645147	1
chr6		NM_001142828	ANGPTL7	71350871	71356299	1
chr6		NM_001244632	FBXO6	71755666	71774264	1
chr6		NM_001243388	HSPB7	75171507	75174918	2
chr6		NM_001267894	TAS1R2	77350456	77364843	1
chr6		NM_001243851	PQLC2	77761860	77778570	1
chr6		NM_001113444	CAPZB	77780681	77912617	2
chr6		NM_214188	DDOST	78885267	78895720	1
chr6		NM_001170828	WNT4	80110253	80123362	1
chr6		NM_213739	PAQR7	83318411	83329567	1
chr6		NM_001244280	CATSPER4	83609348	83627855	1
chr6		NM_001043346	HCRTR1	88139622	88149531	1
chr6		NM_001244624	EIF3I	88695925	88705082	1
chr6		NM_001244804	SS18	110708884	110789793	1
chr6		NM_001145387	GNG12	144782523	144915753	1
chr6		NM_214114	JAK1	147429075	147567187	2
chr6		NM_214266	PRKAA2	155690289	155754244	1
chr6		NM_001199891	LRP8	158905663	158982381	1
chr6		NM_001168415	SCP2	159191044	159314985	1
chr6		NM_214425	CYP4A21	164698438	164715639	2
chr6		NM_001078669	POMGNT1	165213429	165222412	1
chr6		NM_001032356	TCTEX1D4	166527349	166528854	4
chr6		NM_213759	ST3GAL3	167364186	167558738	4
chr6		NM_001167647	ELOVL1	167883974	167885625	2
chr7		NM_001111256	SERPINB9	1723301	1732562	2
chr7		NM_001168001	BMP6	5058816	5208868	3
chr7		NM_001123207	TRIM10	22718482	22728717	1
chr7		NM_001123208	TRIM15	22731741	22742647	1
chr7		NM_001123214	VARS2	23405022	23416185	1
chr7		NM_001128448	CDSN	23520141	23524372	1
chr7		NM_001195378	VARS	23886131	23899265	1
chr7		NM_001114274	MIC-2	23599358	23982179	3
chr7		NM_001101823	EHMT2	23977682	23992673	1
chr7		NM_001101817	SKIV2L	24047015	24057621	1
chr7		NM_001123089	C4A	24068018	24083060	1
chr7		NM_214433	CYP21A2	24086297	24088835	1
chr7		NM_001123204	TNXB	24088872	24155815	1
chr7		NM_001033008	AGPAT1	24205929	24208430	1
chr7		NM_001308410	NUDT3	30343252	30422019	1
chr7		NM_001246264	ANKS1A	30813090	30995369	1
chr7		NM_001037966	TEAD3	31337889	31351449	3
chr7		NM_001243303	BTBD9	33723282	34122597	5
chr7		NM_001128466	DLK2	38452800	38457153	1
chr7		NM_001123084	BLM	53343861	53412495	2
chr7		NM_001134349	KLF15	53877830	53890558	1
chr7		NM_001244544	ARPIN	55469022	55483535	1
chr7		NM_001244403	ETFA	56450508	56540275	1
chr7		NM_001243061	ACTN1	92550132	92644842	3
chr7		NM_001185836	LIN52	97382349	97491672	1
chr7		NM_214198	TGFB3	99133872	99154105	1
chr7		NM_001044536	FOXN3	111041496	111341156	2
chr7		NM_001143692	ITPK1	114362396	114520176	6
chr7		NM_001197194	DICER1	116365742	116408546	2
chr7		NM_001243882	CLMN	116476788	116590181	4
chr7		NM_001297633	BCL11B	120205007	120295737	3
chr7		NM_001244777	EVL	120988250	121056306	4
chr7		NM_001134358	RTL1	121707121	121711414	1
chr8		NM_001244857	SLBP	802939	818154	2
chr8		NM_001244948	LETM1	900278	926493	5
chr8		NM_001044528	RNF4	1369985	1379255	1
chr8		NM_213964	HTT	1809784	1934002	7
chr8		NM_001113436	LRPAP1	2129491	2145632	3
chr8		NM_001195343	HTRA3	2794779	2819686	6
chr8		NM_001253821	AFAP1	3070030	3198319	3
chr8		NM_213849	MAN2B2	4137034	4181195	8
chr8		NM_001134352	KLF3	30024977	30059171	4
chr8		NM_001018033	GUCY1A1	44449414	44517147	1
chr8		NM_001039745	BMPR1B	124538774	124961521	1
chr8		NM_001245979	PKD2	131005404	131058932	1
chr8		NM_001243830	ENOPH1	135775742	135802333	1
chr9		NM_001113055	LMO1	1049647	1082974	5
chr9		NM_001163649	TRIM21	5783287	5789898	2
chr9		NM_001130974	STIM1	6068016	6269423	1
chr9		NM_214049	UCP3	8378022	8389452	2
chr9		NM_001244132	SERPINH1	9782938	9794484	2
chr9		NM_001099928	MYO7A	11251186	11337618	9
chr9		NM_001244730	JAML	45506495	45532674	1
chr9		NM_214225	KCNJ5	55836776	55861288	2
chr9		NM_001244707	VAMP4	114142245	114174968	1
chr9		NM_001129958	SERPINC1	116181987	116193100	1
chr9		NM_213888	CD46	135031206	135078840	1
chr9		NM_001134965	GRB10	136582654	136742545	10
chr9		NM_214007	EGFR	139302409	139474621	3
chrX		NM_001144119	SRPK3	124524140	124528604	1
chrX		NM_001142668	DKC1	125218927	125228881	1
